# Supplementary material for: Cardiac arrest: An interdisciplinary scoping review of clinical literature from 2020
Source: PubMed Central journal article supplement — J Am Coll Emerg Physicians Open. 2022 Jul 14;3(4):e12773. doi: 10.1002/emp2.12773 (PMC9282171; doi:10.1002/emp2.12773), 2022-07-14
Supplement: EMP2-3-e12773-s001.pdf [file EMP2-3-e12773-s001.pdf]

**ICARE: Article Scoring for REVIEW ARTICLES**

|                                                  |                                                      |              |                    |                      | Clarity<br>(5 max) |   |   |   | Design<br>(7 max) |   |   |   | Importance<br>(5 max) |   |   | Impact<br>(5 max) |   |   | Total<br>score<br>(22 max) |
|--------------------------------------------------|------------------------------------------------------|--------------|--------------------|----------------------|--------------------|---|---|---|-------------------|---|---|---|-----------------------|---|---|-------------------|---|---|----------------------------|
| Category<br>(EPH, PRE, IN, PRO,<br>PED, BSP, GL) | Type:<br>Original Research<br>(OR) or Review<br>(RE) | PubMed<br>ID | Editor<br>Initials | Reviewer<br>Initials | A                  | B | C | D | A                 | B | C | D | A                     | B | C | A                 | B | C |                            |
| EPH                                              | RE                                                   | 32437783     | MPB/MABC           | YT                   | 2                  | 1 | 1 | 1 | 3                 | 2 | 1 | 1 | 2                     | 2 | 1 | 2                 | 2 | 1 | 22                         |
| IN                                               | RE                                                   | 31992342     | CH                 | SK                   | 2                  | 1 | 1 | 1 | 3                 | 2 | 1 | 1 | 2                     | 2 | 1 | 2                 | 2 | 1 | 22                         |
| IN                                               | RE                                                   | 32934100     | CH                 | NSh                  | 2                  | 1 | 1 | 1 | 3                 | 2 | 1 | 1 | 2                     | 2 | 1 | 2                 | 2 | 1 | 22                         |
| PED                                              | RE                                                   | 32516929     | LAv                | NSa                  | 2                  | 1 | 1 | 1 | 3                 | 2 | 1 | 1 | 2                     | 2 | 1 | 2                 | 2 | 1 | 22                         |
| PED                                              | RE                                                   | 32707697     | LAv                | LA/JP                | 2                  | 1 | 1 | 1 | 3                 | 2 | 1 | 1 | 2                     | 2 | 1 | 2                 | 2 | 1 | 22                         |
| PED                                              | RE                                                   | 33081526     | LAv                | LA/JP                | 2                  | 1 | 1 | 1 | 3                 | 2 | 1 | 1 | 2                     | 2 | 1 | 2                 | 2 | 1 | 22                         |
| PRE                                              | RE                                                   | 31983493     | DCr                | LB                   | 2                  | 1 | 1 | 1 | 3                 | 2 | 1 | 1 | 2                     | 2 | 1 | 2                 | 2 | 1 | 22                         |
| PRE                                              | RE                                                   | 32088060     | DCr                | CE                   | 2                  | 1 | 1 | 1 | 3                 | 2 | 1 | 1 | 2                     | 2 | 1 | 2                 | 2 | 1 | 22                         |
| PRE                                              | RE                                                   | 32466824     | DCr                | DCr                  | 2                  | 1 | 1 | 1 | 3                 | 2 | 1 | 1 | 2                     | 2 | 1 | 2                 | 2 | 1 | 22                         |
| EPH                                              | RE                                                   | 33174152     | MPB/MABC           | SB                   | 2                  | 1 | 1 | 1 | 3                 | 2 | 1 | 1 | 2                     | 2 | 1 | 2                 | 2 | 0 | 21                         |
| GL                                               | RE                                                   | 33084391     | RB                 | AD                   | 2                  | 1 | 1 | 1 | 3                 | 2 | 0 | 1 | 2                     | 2 | 1 | 2                 | 2 | 1 | 21                         |
| IN                                               | RE                                                   | 32400236     | CH                 | GS                   | 2                  | 1 | 1 | 1 | 3                 | 2 | 0 | 1 | 2                     | 2 | 1 | 2                 | 2 | 1 | 21                         |
| IN                                               | RE                                                   | 33032706     | CH                 | JR                   | 2                  | 1 | 1 | 1 | 3                 | 2 | 0 | 1 | 2                     | 2 | 1 | 2                 | 2 | 1 | 21                         |
| PED                                              | RE                                                   | 28486266     | LAv                | SL                   | 2                  | 1 | 1 | 1 | 3                 | 2 | 0 | 1 | 2                     | 2 | 1 | 2                 | 2 | 1 | 21                         |
| PRE                                              | RE                                                   | 31931808     | DCr                | JPo                  | 2                  | 1 | 1 | 1 | 3                 | 2 | 0 | 1 | 2                     | 2 | 1 | 2                 | 2 | 1 | 21                         |
| PRO                                              | RE                                                   | 31978453     | CM                 | SZ                   | 2                  | 1 | 1 | 1 | 3                 | 2 | 0 | 1 | 2                     | 2 | 1 | 2                 | 2 | 1 | 21                         |
| PRO                                              | RE                                                   | 32437781     | CM                 | TK                   | 2                  | 1 | 1 | 1 | 3                 | 2 | 0 | 1 | 2                     | 2 | 1 | 2                 | 2 | 1 | 21                         |
| PRO                                              | RE                                                   | 32915254     | CM                 | TR                   | 2                  | 1 | 1 | 1 | 3                 | 2 | 0 | 1 | 2                     | 2 | 1 | 2                 | 2 | 1 | 21                         |
| GL                                               | RE                                                   | 32076566     | RB                 | EH                   | 2                  | 1 | 1 | 1 | 3                 | 2 | 1 | 1 | 2                     | 2 | 1 | 2                 | 0 | 1 | 20                         |
| GL                                               | RE                                                   | 32142750     | RB                 | AD                   | 2                  | 1 | 1 | 1 | 3                 | 2 | 1 | 1 | 2                     | 2 | 1 | 2                 | 0 | 1 | 20                         |
| GL                                               | RE                                                   | 32204668     | RB                 | EH                   | 2                  | 1 | 1 | 1 | 3                 | 2 | 1 | 1 | 2                     | 2 | 1 | 2                 | 0 | 1 | 20                         |
| GL                                               | RE                                                   | 32389599     | RB                 | AD                   | 2                  | 1 | 1 | 1 | 3                 | 2 | 1 | 1 | 2                     | 2 | 1 | 2                 | 0 | 1 | 20                         |
| GL                                               | RE                                                   | 32433212     | RB                 | AD                   | 2                  | 1 | 1 | 1 | 3                 | 2 | 1 | 1 | 2                     | 2 | 1 | 2                 | 0 | 1 | 20                         |
| IN                                               | RE                                                   | 31937354     | CH                 | AS                   | 2                  | 1 | 1 | 1 | 3                 | 2 | 1 | 1 | 2                     | 2 | 1 | 2                 | 0 | 1 | 20                         |
| IN                                               | RE                                                   | 32561473     | CH                 | LAl                  | 2                  | 1 | 1 | 1 | 3                 | 2 | 1 | 1 | 2                     | 2 | 1 | 2                 | 0 | 1 | 20                         |
| IN                                               | RE                                                   | 32607968     | CH                 | DCu                  | 2                  | 1 | 1 | 1 | 3                 | 2 | 1 | 1 | 2                     | 2 | 1 | 2                 | 0 | 1 | 20                         |
| IN                                               | RE                                                   | 33031262     | CH                 | NSh                  | 2                  | 1 | 1 | 1 | 3                 | 2 | 1 | 1 | 2                     | 2 | 1 | 2                 | 0 | 1 | 20                         |
| IN                                               | RE                                                   | 33197522     | CH                 | LAl                  | 2                  | 1 | 1 | 1 | 3                 | 2 | 1 | 1 | 2                     | 2 | 1 | 2                 | 0 | 1 | 20                         |
| PRE                                              | RE                                                   | 32975628     | DCr                | MB                   | 2                  | 1 | 1 | 1 | 3                 | 2 | 1 | 1 | 2                     | 2 | 1 | 2                 | 0 | 1 | 20                         |
| PRO                                              | RE                                                   | 32304801     | CM                 | EL                   | 2                  | 1 | 1 | 1 | 3                 | 2 | 1 | 1 | 2                     | 2 | 1 | 2                 | 0 | 1 | 20                         |
| EPH                                              | RE                                                   | 32920113     | MPB/MABC           | SC                   | 2                  | 1 | 1 | 1 | 0                 | 2 | 1 | 1 | 2                     | 2 | 1 | 2                 | 2 | 1 | 19                         |
| GL                                               | RE                                                   | 32371027     | RB                 | AD                   | 2                  | 1 | 1 | 1 | 0                 | 2 | 1 | 1 | 2                     | 2 | 1 | 2                 | 2 | 1 | 19                         |
| GL                                               | RE                                                   | 32609351     | RB                 | EH                   | 2                  | 1 | 1 | 1 | 3                 | 2 | 0 | 1 | 2                     | 2 | 1 | 2                 | 0 | 1 | 19                         |
| GL                                               | RE                                                   | 33081524     | RB                 | EH                   | 2                  | 1 | 1 | 1 | 0                 | 2 | 1 | 1 | 2                     | 2 | 1 | 2                 | 2 | 1 | 19                         |

|       |    |          |          |     |   |   |   |   |   |   |   |   |   |   |   |   |   |   |    |
|-------|----|----------|----------|-----|---|---|---|---|---|---|---|---|---|---|---|---|---|---|----|
| GL    | RE | 33099419 | RB       | AD  | 2 | 0 | 1 | 0 | 3 | 2 | 1 | 0 | 2 | 2 | 1 | 2 | 2 | 1 | 19 |
| GL    | RE | 33138865 | RB       | AD  | 2 | 1 | 1 | 1 | 3 | 2 | 1 | 0 | 0 | 2 | 1 | 2 | 2 | 1 | 19 |
| IN    | RE | 32049278 | CH       | LAl | 2 | 1 | 1 | 1 | 3 | 2 | 1 | 1 | 0 | 2 | 0 | 2 | 2 | 1 | 19 |
| IN    | RE | 32102671 | CH       | DCu | 2 | 1 | 1 | 1 | 0 | 2 | 1 | 1 | 2 | 2 | 1 | 2 | 2 | 1 | 19 |
| IN    | RE | 32284771 | CH       | SK  | 2 | 1 | 1 | 1 | 3 | 2 | 0 | 1 | 2 | 2 | 1 | 2 | 0 | 1 | 19 |
| IN    | RE | 32304388 | CH       | AS  | 2 | 1 | 1 | 1 | 3 | 2 | 0 | 1 | 2 | 2 | 1 | 2 | 0 | 1 | 19 |
| IN    | RE | 32728712 | CH       | SK  | 2 | 1 | 1 | 1 | 3 | 2 | 0 | 1 | 2 | 2 | 1 | 2 | 0 | 1 | 19 |
| IN    | RE | 33071073 | CH       | DB  | 2 | 1 | 1 | 1 | 3 | 2 | 0 | 1 | 2 | 2 | 1 | 2 | 0 | 1 | 19 |
| PED   | RE | 31994613 | LAv      | KM  | 2 | 1 | 1 | 1 | 3 | 2 | 0 | 1 | 2 | 2 | 1 | 2 | 0 | 1 | 19 |
| PRE   | RE | 32441184 | DCr      | BC  | 2 | 1 | 1 | 1 | 0 | 2 | 1 | 1 | 2 | 2 | 1 | 2 | 2 | 1 | 19 |
| PRE   | RE | 33140398 | DCr      | JPo | 2 | 1 | 1 | 1 | 3 | 2 | 0 | 1 | 2 | 2 | 1 | 2 | 0 | 1 | 19 |
| PRO   | RE | 32365854 | CM       | AFr | 2 | 1 | 1 | 1 | 0 | 2 | 1 | 1 | 2 | 2 | 1 | 2 | 2 | 1 | 19 |
| PRO   | RE | 32562686 | CM       | PP  | 2 | 1 | 1 | 1 | 3 | 2 | 0 | 1 | 2 | 2 | 1 | 2 | 0 | 1 | 19 |
| EPH   | RE | 32810560 | MPB/MABC | SC  | 2 | 1 | 1 | 0 | 3 | 2 | 1 | 0 | 2 | 2 | 1 | 2 | 0 | 1 | 18 |
| EPH   | RE | 33010372 | MPB/MABC | SC  | 2 | 1 | 1 | 1 | 3 | 0 | 1 | 1 | 2 | 2 | 1 | 2 | 0 | 1 | 18 |
| GL    | RE | 33084390 | RB       | EH  | 2 | 1 | 1 | 1 | 0 | 2 | 0 | 1 | 2 | 2 | 1 | 2 | 2 | 1 | 18 |
| GL    | RE | 33091602 | RB       | AD  | 2 | 1 | 1 | 1 | 0 | 2 | 1 | 0 | 2 | 2 | 1 | 2 | 2 | 1 | 18 |
| GL    | RE | 33098918 | RB       | EH  | 2 | 1 | 1 | 1 | 0 | 2 | 0 | 1 | 2 | 2 | 1 | 2 | 2 | 1 | 18 |
| GL    | RE | 33098921 | RB       | EH  | 2 | 1 | 1 | 1 | 0 | 2 | 0 | 1 | 2 | 2 | 1 | 2 | 2 | 1 | 18 |
| IN    | RE | 32780340 | CH       | NSh | 2 | 1 | 1 | 1 | 3 | 2 | 0 | 1 | 2 | 2 | 1 | 2 | 0 | 0 | 18 |
| IN    | RE | 32832091 | CH       | LAl | 2 | 1 | 1 | 1 | 3 | 2 | 0 | 1 | 2 | 2 | 1 | 2 | 0 | 0 | 18 |
| IN    | RE | 32696232 | CH       | SC  | 2 | 1 | 1 | 1 | 3 | 2 | 1 | 1 | 0 | 2 | 1 | 2 | 0 | 1 | 18 |
| IN    | RE | 32798042 | CH       | SC  | 2 | 1 | 0 | 1 | 3 | 2 | 0 | 1 | 2 | 2 | 1 | 2 | 0 | 1 | 18 |
| PED   | RE | 32345933 | LAv      | AH  | 2 | 1 | 1 | 1 | 3 | 2 | 1 | 1 | 2 | 2 | 1 | 0 | 0 | 1 | 18 |
| PRE   | RE | 32755666 | DCr      | SC  | 2 | 1 | 1 | 1 | 3 | 2 | 1 | 1 | 2 | 2 | 1 | 0 | 0 | 1 | 18 |
| PRO   | RE | 32857778 | CM       | CC  | 2 | 1 | 1 | 1 | 3 | 2 | 1 | 1 | 2 | 2 | 1 | 0 | 0 | 1 | 18 |
| PRO   | RE | 33426054 | CM       | PP  | 2 | 1 | 1 | 1 | 3 | 2 | 1 | 1 | 2 | 2 | 1 | 0 | 0 | 1 | 18 |
| COVID | RE | 32949726 | YE       | FA  | 2 | 1 | 1 | 1 | 0 | 2 | 0 | 1 | 2 | 2 | 1 | 2 | 2 | 0 | 17 |
| COVID | RE | 33137418 | YE       | MA  | 2 | 1 | 1 | 1 | 0 | 2 | 1 | 1 | 2 | 2 | 1 | 2 | 0 | 1 | 17 |
| GL    | RE | 32087741 | RB       | AD  | 2 | 1 | 1 | 1 | 0 | 2 | 1 | 1 | 2 | 2 | 1 | 2 | 0 | 1 | 17 |
| GL    | RE | 32131575 | RB       | EH  | 2 | 1 | 1 | 1 | 3 | 0 | 0 | 1 | 2 | 2 | 1 | 2 | 0 | 1 | 17 |
| GL    | RE | 32434791 | RB       | AD  | 2 | 1 | 1 | 1 | 0 | 2 | 1 | 1 | 2 | 2 | 1 | 2 | 0 | 1 | 17 |
| IN    | RE | 31923532 | CH       | SC  | 2 | 1 | 1 | 1 | 3 | 2 | 0 | 1 | 2 | 2 | 1 | 0 | 0 | 1 | 17 |
| IN    | RE | 32572823 | CH       | DB  | 2 | 1 | 1 | 1 | 0 | 2 | 1 | 1 | 2 | 2 | 1 | 2 | 0 | 1 | 17 |
| IN    | RE | 33046293 | CH       | DCu | 2 | 1 | 1 | 1 | 0 | 2 | 1 | 1 | 2 | 2 | 1 | 2 | 0 | 1 | 17 |
| PED   | RE | 32541373 | LAv      | AL  | 2 | 1 | 1 | 1 | 0 | 2 | 1 | 1 | 2 | 2 | 1 | 2 | 0 | 1 | 17 |
| PRE   | RE | 32600490 | DCr      | JPo | 2 | 1 | 1 | 1 | 0 | 2 | 1 | 1 | 2 | 2 | 1 | 2 | 0 | 1 | 17 |
| PRE   | RE | 32631439 | DCr      | CE  | 2 | 1 | 1 | 1 | 0 | 2 | 1 | 1 | 2 | 2 | 1 | 2 | 0 | 1 | 17 |
| PRE   | RE | 33253767 | DCr      | BC  | 2 | 1 | 1 | 1 | 0 | 2 | 1 | 1 | 2 | 2 | 1 | 2 | 0 | 1 | 17 |
| PRO   | RE | 32332280 | CM       | JN  | 2 | 1 | 1 | 1 | 3 | 2 | 0 | 1 | 0 | 2 | 1 | 2 | 0 | 1 | 17 |
| PRO   | RE | 32787675 | CM       | EL  | 2 | 1 | 1 | 1 | 0 | 2 | 1 | 1 | 2 | 2 | 1 | 2 | 0 | 1 | 17 |
| PRO   | RE | 32807207 | CM       | SZ  | 2 | 1 | 1 | 1 | 3 | 2 | 0 | 1 | 0 | 2 | 1 | 2 | 0 | 1 | 17 |
| PRO   | RE | 33387469 | CM       | JN  | 2 | 1 | 1 | 1 | 3 | 2 | 0 | 1 | 2 | 2 | 1 | 0 | 0 | 1 | 17 |
| COVID | RE | 32325096 | YE       | JW  | 2 | 1 | 1 | 1 | 0 | 2 | 0 | 1 | 2 | 2 | 1 | 2 | 0 | 1 | 16 |

|       |    |          |          |       |   |   |   |   |   |   |   |   |   |   |   |   |   |   |    |
|-------|----|----------|----------|-------|---|---|---|---|---|---|---|---|---|---|---|---|---|---|----|
| COVID | RE | 33041141 | YE       | SF    | 2 | 1 | 1 | 1 | 0 | 2 | 0 | 1 | 2 | 2 | 1 | 2 | 0 | 1 | 16 |
| COVID | RE | 33403363 | YE       | FA    | 2 | 1 | 1 | 1 | 0 | 0 | 0 | 1 | 2 | 2 | 1 | 2 | 2 | 1 | 16 |
| EPH   | RE | 32721478 | MPB/MABC | SC    | 2 | 1 | 1 | 1 | 0 | 0 | 0 | 1 | 2 | 2 | 1 | 2 | 2 | 1 | 16 |
| GL    | RE | 32078390 | RB       | EH    | 2 | 1 | 1 | 1 | 0 | 0 | 0 | 1 | 2 | 2 | 1 | 2 | 2 | 1 | 16 |
| GL    | RE | 33129915 | RB       | SC    | 0 | 1 | 1 | 1 | 3 | 2 | 1 | 1 | 2 | 2 | 1 | 0 | 0 | 1 | 16 |
| GL    | RE | 32755663 | RB       | SC    | 2 | 1 | 1 | 1 | 3 | 2 | 1 | 1 | 0 | 2 | 1 | 0 | 0 | 1 | 16 |
| IN    | RE | 31789981 | CH       | NSh   | 2 | 1 | 1 | 1 | 0 | 2 | 0 | 1 | 2 | 2 | 1 | 2 | 0 | 1 | 16 |
| IN    | RE | 33137159 | CH       | AS    | 2 | 1 | 1 | 1 | 3 | 2 | 1 | 1 | 0 | 2 | 1 | 0 | 0 | 1 | 16 |
| IN    | RE | 33165089 | CH       | GS    | 2 | 1 | 1 | 1 | 0 | 2 | 0 | 1 | 2 | 2 | 1 | 2 | 0 | 1 | 16 |
| IN    | RE | 33058991 | CH       | SC    | 2 | 1 | 1 | 1 | 3 | 0 | 1 | 1 | 2 | 2 | 1 | 0 | 0 | 1 | 16 |
| PRE   | RE | 33046315 | DCr      | DCr   | 2 | 1 | 1 | 1 | 0 | 2 | 0 | 1 | 2 | 2 | 1 | 2 | 0 | 1 | 16 |
| PRE   | RE | 33254164 | DCr      | LB    | 2 | 1 | 1 | 1 | 0 | 2 | 0 | 1 | 2 | 2 | 1 | 2 | 0 | 1 | 16 |
| PRE   | RE | 32737007 | DCr      | SC    | 2 | 1 | 1 | 1 | 3 | 0 | 1 | 1 | 0 | 2 | 1 | 2 | 0 | 1 | 16 |
| PRO   | RE | 32531405 | CM       | SG    | 2 | 1 | 1 | 1 | 3 | 2 | 1 | 1 | 0 | 2 | 1 | 0 | 0 | 1 | 16 |
| PRO   | RE | 33333181 | CM       | TK    | 2 | 1 | 1 | 1 | 0 | 2 | 0 | 1 | 2 | 2 | 1 | 2 | 0 | 1 | 16 |
| COVID | RE | 33276842 | YE       | SC    | 2 | 1 | 1 | 1 | 0 | 0 | 0 | 0 | 2 | 2 | 1 | 2 | 2 | 1 | 15 |
| COVID | RE | 33130157 | YE       | SC    | 2 | 1 | 1 | 1 | 3 | 0 | 0 | 1 | 2 | 2 | 1 | 0 | 0 | 1 | 15 |
| EPH   | RE | 31876165 | MPB/MABC | EM    | 2 | 1 | 1 | 1 | 3 | 2 | 0 | 1 | 0 | 2 | 1 | 0 | 0 | 1 | 15 |
| EPH   | RE | 33143958 | MPB/MABC | YT    | 2 | 1 | 1 | 1 | 0 | 2 | 0 | 0 | 0 | 2 | 1 | 2 | 2 | 1 | 15 |
| GL    | RE | 32540113 | RB       | EH    | 2 | 1 | 1 | 1 | 0 | 0 | 0 | 1 | 2 | 2 | 1 | 2 | 2 | 0 | 15 |
| GL    | RE | 33081525 | RB       | AD    | 2 | 1 | 1 | 1 | 3 | 2 | 1 | 1 | 2 | 0 | 1 | 0 | 0 | 0 | 15 |
| IN    | RE | 31907075 | CH       | SK    | 2 | 1 | 1 | 1 | 0 | 0 | 0 | 0 | 2 | 2 | 1 | 2 | 2 | 1 | 15 |
| IN    | RE | 32578471 | CH       | JR    | 2 | 1 | 1 | 1 | 0 | 2 | 1 | 1 | 0 | 2 | 1 | 2 | 0 | 1 | 15 |
| IN    | RE | 32892825 | CH       | SK    | 2 | 1 | 1 | 1 | 0 | 2 | 0 | 0 | 2 | 2 | 1 | 2 | 0 | 1 | 15 |
| IN    | RE | 33002969 | CH       | LAI   | 2 | 1 | 1 | 1 | 0 | 2 | 1 | 1 | 2 | 2 | 1 | 0 | 0 | 1 | 15 |
| IN    | RE | 33251235 | CH       | SK    | 2 | 1 | 1 | 1 | 0 | 2 | 0 | 0 | 2 | 2 | 1 | 2 | 0 | 1 | 15 |
| PED   | RE | 32070780 | LAv      | ME/JH | 2 | 1 | 1 | 1 | 0 | 2 | 1 | 1 | 2 | 2 | 1 | 0 | 0 | 1 | 15 |
| PRE   | RE | 32768497 | DCr      | SC    | 2 | 0 | 1 | 1 | 3 | 0 | 1 | 1 | 2 | 2 | 1 | 0 | 0 | 1 | 15 |
| PRO   | RE | 32920881 | CM       | AFr   | 2 | 1 | 1 | 1 | 0 | 2 | 1 | 1 | 0 | 2 | 1 | 2 | 0 | 1 | 15 |
| PRO   | RE | 33336311 | CM       | CC    | 2 | 1 | 1 | 1 | 0 | 0 | 0 | 0 | 2 | 2 | 1 | 2 | 2 | 1 | 15 |
| COVID | RE | 32707142 | YE       | SC    | 2 | 1 | 1 | 1 | 0 | 0 | 0 | 1 | 2 | 2 | 1 | 2 | 0 | 1 | 14 |
| EPH   | RE | 32122716 | MPB/MABC | GK    | 2 | 1 | 1 | 1 | 0 | 0 | 0 | 1 | 2 | 2 | 1 | 2 | 0 | 1 | 14 |
| EPH   | RE | 32242971 | MPB/MABC | JA    | 2 | 1 | 1 | 1 | 0 | 0 | 0 | 1 | 0 | 2 | 1 | 2 | 2 | 1 | 14 |
| GL    | RE | 31765933 | RB       | EH    | 2 | 1 | 1 | 1 | 0 | 0 | 0 | 1 | 2 | 2 | 1 | 2 | 0 | 1 | 14 |
| GL    | RE | 32044073 | RB       | EH    | 2 | 1 | 1 | 1 | 0 | 0 | 0 | 1 | 2 | 2 | 1 | 2 | 0 | 1 | 14 |
| GL    | RE | 32367476 | RB       | EH    | 2 | 1 | 1 | 1 | 0 | 0 | 0 | 1 | 2 | 2 | 1 | 2 | 0 | 1 | 14 |
| GL    | RE | 32892826 | RB       | EH    | 2 | 1 | 1 | 1 | 0 | 0 | 0 | 1 | 2 | 2 | 1 | 2 | 0 | 1 | 14 |
| GL    | RE | 33098922 | RB       | AD    | 2 | 1 | 1 | 1 | 0 | 0 | 1 | 0 | 2 | 2 | 1 | 2 | 0 | 1 | 14 |
| GL    | RE | 32892828 | RB       | SC    | 2 | 1 | 1 | 1 | 0 | 0 | 0 | 1 | 2 | 2 | 1 | 2 | 0 | 1 | 14 |
| IN    | RE | 32871868 | CH       | JR    | 2 | 0 | 0 | 0 | 3 | 2 | 1 | 0 | 2 | 2 | 1 | 0 | 0 | 1 | 14 |
| IN    | RE | 33089022 | CH       | MM    | 2 | 1 | 1 | 1 | 0 | 0 | 0 | 1 | 2 | 2 | 1 | 2 | 0 | 1 | 14 |
| PED   | RE | 31580845 | LAv      | KC    | 2 | 1 | 1 | 1 | 0 | 2 | 0 | 1 | 2 | 2 | 1 | 0 | 0 | 1 | 14 |
| PRE   | RE | 32332286 | DCr      | DCr   | 2 | 1 | 1 | 1 | 0 | 0 | 0 | 1 | 2 | 2 | 1 | 2 | 0 | 1 | 14 |
| PRE   | RE | 32348091 | DCr      | DCr   | 2 | 1 | 1 | 1 | 0 | 0 | 0 | 1 | 2 | 2 | 1 | 2 | 0 | 1 | 14 |

|       |    |          |          |       |   |   |   |   |   |   |   |   |   |   |   |   |   |   |    |
|-------|----|----------|----------|-------|---|---|---|---|---|---|---|---|---|---|---|---|---|---|----|
| PRE   | RE | 32375010 | DCr      | RC    | 2 | 1 | 1 | 1 | 0 | 0 | 0 | 1 | 2 | 2 | 1 | 2 | 0 | 1 | 14 |
| PRE   | RE | 32740425 | DCr      | LB    | 2 | 1 | 1 | 1 | 0 | 0 | 0 | 1 | 2 | 2 | 1 | 2 | 0 | 1 | 14 |
| PRE   | RE | 32921542 | DCr      | JPo   | 2 | 1 | 1 | 1 | 0 | 2 | 0 | 1 | 0 | 2 | 1 | 2 | 0 | 1 | 14 |
| PRO   | RE | 32430978 | CM       | SC    | 2 | 1 | 1 | 1 | 0 | 0 | 0 | 1 | 2 | 2 | 1 | 2 | 0 | 1 | 14 |
| COVID | RE | 32656798 | YE       | MD    | 2 | 1 | 1 | 1 | 0 | 0 | 0 | 0 | 0 | 2 | 1 | 2 | 2 | 1 | 13 |
| COVID | RE | 32916218 | YE       | MA    | 0 | 1 | 0 | 1 | 3 | 0 | 0 | 1 | 0 | 2 | 1 | 2 | 2 | 0 | 13 |
| GL    | RE | 32374256 | RB       | AD    | 2 | 1 | 1 | 1 | 0 | 0 | 0 | 0 | 2 | 2 | 1 | 2 | 0 | 1 | 13 |
| GL    | RE | 32502424 | RB       | AD    | 2 | 1 | 1 | 1 | 0 | 0 | 0 | 0 | 2 | 2 | 1 | 2 | 0 | 1 | 13 |
| GL    | RE | 32618012 | RB       | AD    | 2 | 1 | 1 | 1 | 0 | 0 | 0 | 0 | 2 | 2 | 1 | 2 | 0 | 1 | 13 |
| GL    | RE | 33036856 | RB       | EH    | 2 | 1 | 1 | 1 | 0 | 0 | 0 | 1 | 2 | 2 | 1 | 2 | 0 | 0 | 13 |
| GL    | RE | 33109950 | RB       | AD    | 2 | 1 | 1 | 1 | 0 | 0 | 0 | 0 | 2 | 2 | 1 | 2 | 0 | 1 | 13 |
| GL    | RE | 33127032 | RB       | SC    | 2 | 1 | 1 | 1 | 0 | 0 | 0 | 0 | 0 | 2 | 1 | 2 | 2 | 1 | 13 |
| GL    | RE | 32840069 | RB       | SC    | 2 | 1 | 1 | 1 | 0 | 0 | 0 | 0 | 0 | 2 | 1 | 2 | 2 | 1 | 13 |
| GL    | RE | 32892823 | RB       | SC    | 2 | 1 | 1 | 1 | 0 | 0 | 0 | 0 | 2 | 2 | 1 | 2 | 0 | 1 | 13 |
| IN    | RE | 32348093 | CH       | JR    | 2 | 1 | 0 | 1 | 0 | 0 | 0 | 1 | 2 | 2 | 1 | 2 | 0 | 1 | 13 |
| IN    | RE | 32467405 | CH       | MM    | 2 | 1 | 1 | 1 | 0 | 2 | 0 | 1 | 2 | 0 | 0 | 0 | 2 | 1 | 13 |
| IN    | RE | 32829996 | CH       | DB    | 0 | 0 | 1 | 1 | 0 | 0 | 0 | 1 | 2 | 2 | 1 | 2 | 2 | 1 | 13 |
| IN    | RE | 33002970 | CH       | GS    | 2 | 1 | 1 | 1 | 0 | 0 | 0 | 1 | 2 | 2 | 1 | 2 | 0 | 0 | 13 |
| IN    | RE | 33027149 | CH       | DCu   | 2 | 1 | 1 | 1 | 0 | 0 | 0 | 0 | 2 | 2 | 1 | 2 | 0 | 1 | 13 |
| IN    | RE | 33245547 | CH       | DB    | 2 | 1 | 1 | 1 | 0 | 0 | 0 | 0 | 2 | 2 | 1 | 2 | 0 | 1 | 13 |
| IN    | RE | 33313705 | CH       | MM    | 2 | 1 | 1 | 1 | 0 | 0 | 0 | 1 | 2 | 2 | 1 | 2 | 0 | 0 | 13 |
| IN    | RE | 33315152 | CH       | JR    | 2 | 1 | 1 | 1 | 0 | 0 | 0 | 0 | 2 | 2 | 1 | 2 | 0 | 1 | 13 |
| PED   | RE | 32024336 | LAv      | LA/JP | 2 | 1 | 1 | 1 | 0 | 0 | 0 | 0 | 2 | 2 | 1 | 2 | 0 | 1 | 13 |
| PED   | RE | 32381279 | LAv      | NA    | 2 | 1 | 1 | 1 | 0 | 0 | 0 | 0 | 2 | 2 | 1 | 2 | 0 | 1 | 13 |
| PED   | RE | 33226408 | LAv      | NSa   | 2 | 1 | 1 | 1 | 0 | 0 | 0 | 0 | 2 | 2 | 1 | 2 | 0 | 1 | 13 |
| PRE   | RE | 32762909 | DCr      | BC    | 2 | 1 | 0 | 1 | 0 | 0 | 0 | 1 | 2 | 2 | 1 | 2 | 0 | 1 | 13 |
| PRE   | RE | 32982493 | DCr      | CE    | 2 | 1 | 1 | 1 | 0 | 0 | 0 | 0 | 2 | 2 | 1 | 2 | 0 | 1 | 13 |
| PRO   | RE | 31907802 | CM       | JN    | 2 | 1 | 1 | 1 | 0 | 0 | 0 | 0 | 2 | 2 | 1 | 2 | 0 | 1 | 13 |
| EPH   | RE | 33052579 | MPB/MABC | JA    | 2 | 1 | 1 | 1 | 0 | 0 | 0 | 1 | 0 | 2 | 1 | 0 | 2 | 1 | 12 |
| GL    | RE | 31512559 | RB       | EH    | 2 | 1 | 1 | 1 | 0 | 0 | 0 | 1 | 0 | 2 | 1 | 2 | 0 | 1 | 12 |
| GL    | RE | 32361851 | RB       | AD    | 2 | 1 | 1 | 1 | 0 | 0 | 0 | 0 | 2 | 2 | 1 | 2 | 0 | 0 | 12 |
| GL    | RE | 32620487 | RB       | SC    | 2 | 1 | 1 | 1 | 0 | 0 | 0 | 1 | 0 | 2 | 1 | 2 | 0 | 1 | 12 |
| GL    | RE | 32638902 | RB       | EH    | 2 | 0 | 1 | 1 | 0 | 0 | 0 | 1 | 2 | 2 | 1 | 2 | 0 | 0 | 12 |
| GL    | RE | 32755091 | RB       | AD    | 2 | 1 | 1 | 0 | 0 | 0 | 0 | 0 | 2 | 2 | 1 | 2 | 0 | 1 | 12 |
| GL    | RE | 32981615 | RB       | EH    | 0 | 1 | 1 | 1 | 0 | 0 | 0 | 1 | 2 | 2 | 1 | 2 | 0 | 1 | 12 |
| GL    | RE | 33040363 | RB       | AD    | 2 | 1 | 1 | 0 | 0 | 0 | 0 | 0 | 2 | 2 | 1 | 2 | 0 | 1 | 12 |
| IN    | RE | 32304957 | CH       | NSh   | 2 | 1 | 1 | 1 | 0 | 2 | 1 | 1 | 0 | 2 | 1 | 0 | 0 | 0 | 12 |
| PED   | RE | 30827253 | LAv      | ME/JH | 2 | 1 | 1 | 1 | 0 | 0 | 0 | 1 | 0 | 2 | 1 | 2 | 0 | 1 | 12 |
| PRE   | RE | 32109504 | DCr      | MB    | 2 | 1 | 1 | 1 | 0 | 0 | 0 | 0 | 2 | 2 | 1 | 2 | 0 | 0 | 12 |
| PRE   | RE | 32766558 | DCr      | DCr   | 2 | 1 | 1 | 0 | 0 | 0 | 0 | 0 | 0 | 2 | 1 | 2 | 2 | 1 | 12 |
| PRE   | RE | 33387933 | DCr      | RC    | 2 | 1 | 1 | 1 | 0 | 0 | 0 | 1 | 0 | 2 | 1 | 2 | 0 | 1 | 12 |
| GL    | RE | 32981616 | RB       | EH    | 0 | 1 | 1 | 1 | 0 | 0 | 0 | 1 | 2 | 2 | 1 | 2 | 0 | 0 | 11 |
| EPH   | RE | 30808611 | MPB/MABC | GK    | 2 | 1 | 1 | 1 | 0 | 2 | 0 | 1 | 0 | 0 | 1 | 0 | 0 | 1 | 10 |
| EPH   | RE | 31390006 | MPB/MABC | SB    | 2 | 1 | 1 | 1 | 0 | 2 | 1 | 1 | 0 | 0 | 1 | 0 | 0 | 0 | 10 |

|     |    |          |                 |       |   |   |   |   |   |   |   |   |   |   |   |   |   |   |    |
|-----|----|----------|-----------------|-------|---|---|---|---|---|---|---|---|---|---|---|---|---|---|----|
| EPH | RE | 31909521 | MPB/MABC        | YT    | 2 | 1 | 1 | 1 | 0 | 0 | 0 | 1 | 0 | 2 | 1 | 0 | 0 | 1 | 10 |
| GL  | RE | 32300931 | RB              | EH    | 2 | 1 | 1 | 1 | 0 | 0 | 0 | 0 | 0 | 2 | 1 | 2 | 0 | 0 | 10 |
| GL  | RE | 32981624 | RB              | AD    | 0 | 1 | 1 | 0 | 0 | 0 | 0 | 0 | 2 | 2 | 1 | 2 | 0 | 1 | 10 |
| IN  | RE | 32981628 | CH              | AS    | 0 | 1 | 1 | 1 | 0 | 0 | 0 | 0 | 2 | 2 | 1 | 2 | 0 | 0 | 10 |
| EPH | RE | 31008774 | MPB/MABC        | EM    | 2 | 1 | 1 | 1 | 0 | 0 | 0 | 0 | 0 | 2 | 1 | 0 | 0 | 1 | 9  |
| EPH | RE | 33437484 | MPB/MABC        | GK    | 2 | 1 | 1 | 1 | 0 | 2 | 1 | 1 | 0 | 0 | 0 | 0 | 0 | 0 | 9  |
| IN  | RE | 32624462 | CH              | LAI   | 2 | 0 | 0 | 0 | 0 | 0 | 0 | 1 | 2 | 2 | 1 | 0 | 0 | 1 | 9  |
| PED | RE | 32981620 | LA <sub>v</sub> | ME/JH | 2 | 1 | 1 | 1 | 0 | 0 | 0 | 0 | 2 | 0 | 1 | 0 | 0 | 0 | 8  |
| EPH | RE | 32088067 | MPB/MABC        | CP    | 2 | 1 | 1 | 1 | 0 | 0 | 0 | 1 | 0 | 0 | 1 | 0 | 0 | 0 | 7  |
| IN  | RE | 33068641 | CH              | GS    | 2 | 1 | 1 | 1 | 0 | 0 | 0 | 1 | 0 | 0 | 0 | 0 | 0 | 1 | 7  |
| EPH | RE | 32523432 | MPB/MABC        | CP    | 0 | 1 | 1 | 1 | 0 | 2 | 0 | 0 | 0 | 0 | 1 | 0 | 0 | 0 | 6  |
| EPH | RE | 33040200 | MPB/MABC        | CP    | 2 | 1 | 1 | 1 | 0 | 0 | 0 | 0 | 0 | 0 | 1 | 0 | 0 | 0 | 6  |
| GL  | RE | 32843120 | RB              | EH    | 0 | 1 | 1 | 1 | 0 | 0 | 0 | 0 | 2 | 0 | 0 | 0 | 0 | 0 | 5  |
| EPH | RE | 31949025 | MPB/MABC        | SB    | 0 | 1 | 0 | 1 | 0 | 0 | 1 | 1 | 0 | 0 | 0 | 0 | 0 | 0 | 4  |
| EPH | RE | 32371340 | MPB/MABC        | SB    | 0 | 1 | 1 | 1 | 0 | 0 | 1 | 0 | 0 | 0 | 0 | 0 | 0 | 0 | 4  |
