# Supplementary material for: Cardiac arrest: An interdisciplinary scoping review of clinical literature from 2020
Source: PubMed Central journal article supplement — J Am Coll Emerg Physicians Open. 2022 Jul 14;3(4):e12773. doi: 10.1002/emp2.12773 (PMC9282171; doi:10.1002/emp2.12773), 2022-07-14
Supplement: EMP2-3-e12773-s004.pdf [file EMP2-3-e12773-s004.pdf]

**ICARE: Article Scoring for ORIGINAL RESEARCH ARTICLES**

|                                            |                                             |           |                 |                   | Design (8 max) |   |   |   |   | Ethics (4 max) |   |   | Importance (5 max) |   |   | Impact (5 max) |   |   | Total score (22 max) |
|--------------------------------------------|---------------------------------------------|-----------|-----------------|-------------------|----------------|---|---|---|---|----------------|---|---|--------------------|---|---|----------------|---|---|----------------------|
| Category (EPH, PRE, IN, PRO, PED, BSP, GL) | Type: Original Research (OR) or Review (RE) | PubMed ID | Editor Initials | Reviewer Initials | A              | B | C | D | E | A              | B | C | A                  | B | C | A              | B | C |                      |
| PED                                        | OR                                          | 32292179  | LAv             | ME/JH             | 4              | 1 | 1 | 1 | 1 | 2              | 1 | 1 | 2                  | 2 | 1 | 2              | 2 | 1 | 22                   |
| IN                                         | OR                                          | 32372965  | CH              | LAI               | 4              | 1 | 1 | 1 | 1 | 2              | 1 | 1 | 2                  | 2 | 1 | 2              | 2 | 1 | 22                   |
| IN                                         | OR                                          | 32792079  | CH              | JR                | 4              | 1 | 1 | 1 | 1 | 2              | 1 | 1 | 2                  | 2 | 1 | 2              | 2 | 1 | 22                   |
| PED                                        | OR                                          | 32208443  | LAv             | AL                | 3              | 1 | 1 | 1 | 1 | 2              | 1 | 1 | 2                  | 2 | 1 | 2              | 2 | 1 | 21                   |
| PRO                                        | OR                                          | 32345356  | CM              | TP                | 3              | 1 | 1 | 1 | 1 | 2              | 1 | 1 | 2                  | 2 | 1 | 2              | 2 | 1 | 21                   |
| PRO                                        | OR                                          | 32445783  | CM              | EL                | 3              | 1 | 1 | 1 | 1 | 2              | 1 | 1 | 2                  | 2 | 1 | 2              | 2 | 1 | 21                   |
| EPH                                        | OR                                          | 32976224  | MPB/MABC        | YT                | 3              | 1 | 1 | 1 | 1 | 2              | 1 | 1 | 2                  | 2 | 1 | 2              | 2 | 1 | 21                   |
| COVID                                      | OR                                          | 33403365  | YE              | MD                | 3              | 1 | 1 | 1 | 1 | 2              | 1 | 1 | 2                  | 2 | 1 | 2              | 2 | 1 | 21                   |
| PRO                                        | OR                                          | 30950641  | CM              | CC                | 2              | 1 | 1 | 1 | 1 | 2              | 1 | 1 | 2                  | 2 | 1 | 2              | 2 | 1 | 20                   |
| IN                                         | OR                                          | 31394154  | CH              | NSh               | 2              | 1 | 1 | 1 | 1 | 2              | 1 | 1 | 2                  | 2 | 1 | 2              | 2 | 1 | 20                   |
| PRE                                        | OR                                          | 31469063  | DCr             | AFe               | 2              | 1 | 1 | 1 | 1 | 2              | 1 | 1 | 2                  | 2 | 1 | 2              | 2 | 1 | 20                   |
| PRE                                        | OR                                          | 31896278  | DCr             | RC                | 2              | 1 | 1 | 1 | 1 | 2              | 1 | 1 | 2                  | 2 | 1 | 2              | 2 | 1 | 20                   |
| PRE                                        | OR                                          | 31923531  | DCr             | MB                | 2              | 1 | 1 | 1 | 1 | 2              | 1 | 1 | 2                  | 2 | 1 | 2              | 2 | 1 | 20                   |
| PED                                        | OR                                          | 31931094  | LAv             | NA                | 2              | 1 | 1 | 1 | 1 | 2              | 1 | 1 | 2                  | 2 | 1 | 2              | 2 | 1 | 20                   |
| PRO                                        | OR                                          | 31939784  | CM              | TP                | 2              | 1 | 1 | 1 | 1 | 2              | 1 | 1 | 2                  | 2 | 1 | 2              | 2 | 1 | 20                   |
| PRE                                        | OR                                          | 31982506  | DCr             | AFe               | 2              | 1 | 1 | 1 | 1 | 2              | 1 | 1 | 2                  | 2 | 1 | 2              | 2 | 1 | 20                   |
| IN                                         | OR                                          | 32001056  | CH              | JR                | 2              | 1 | 1 | 1 | 1 | 2              | 1 | 1 | 2                  | 2 | 1 | 2              | 2 | 1 | 20                   |
| IN                                         | OR                                          | 32004081  | CH              | MM                | 4              | 1 | 1 | 1 | 1 | 2              | 1 | 1 | 2                  | 2 | 1 | 2              | 0 | 1 | 20                   |
| PRO                                        | OR                                          | 32004660  | CM              | CC                | 2              | 1 | 1 | 1 | 1 | 2              | 1 | 1 | 2                  | 2 | 1 | 2              | 2 | 1 | 20                   |
| PRO                                        | OR                                          | 32016534  | CM              | TK                | 2              | 1 | 1 | 1 | 1 | 2              | 1 | 1 | 2                  | 2 | 1 | 2              | 2 | 1 | 20                   |
| PRO                                        | OR                                          | 32035995  | CM              | TK                | 2              | 1 | 1 | 1 | 1 | 2              | 1 | 1 | 2                  | 2 | 1 | 2              | 2 | 1 | 20                   |
| EPH                                        | OR                                          | 32063126  | MPB/MABC        | JA                | 2              | 1 | 1 | 1 | 1 | 2              | 1 | 1 | 2                  | 2 | 1 | 2              | 2 | 1 | 20                   |
| EPH                                        | OR                                          | 32067590  | MPB/MABC        | SB                | 2              | 1 | 1 | 1 | 1 | 2              | 1 | 1 | 2                  | 2 | 1 | 2              | 2 | 1 | 20                   |
| PRE                                        | OR                                          | 32068026  | DCr             | CE                | 2              | 1 | 1 | 1 | 1 | 2              | 1 | 1 | 2                  | 2 | 1 | 2              | 2 | 1 | 20                   |
| PRO                                        | OR                                          | 32087761  | CM              | TK                | 2              | 1 | 1 | 1 | 1 | 2              | 1 | 1 | 2                  | 2 | 1 | 2              | 2 | 1 | 20                   |
| PRE                                        | OR                                          | 32088255  | DCr             | AFe               | 2              | 1 | 1 | 1 | 1 | 2              | 1 | 1 | 2                  | 2 | 1 | 2              | 2 | 1 | 20                   |
| IN                                         | OR                                          | 32154359  | CH              | AS                | 4              | 1 | 1 | 1 | 1 | 2              | 1 | 1 | 2                  | 2 | 1 | 2              | 0 | 1 | 20                   |
| IN                                         | OR                                          | 32204725  | CH              | JR                | 2              | 1 | 1 | 1 | 1 | 2              | 1 | 1 | 2                  | 2 | 1 | 2              | 2 | 1 | 20                   |
| IN                                         | OR                                          | 32205507  | CH              | NSh               | 4              | 1 | 1 | 1 | 1 | 2              | 1 | 1 | 2                  | 2 | 1 | 2              | 0 | 1 | 20                   |
| PRO                                        | OR                                          | 32213644  | CM              | CC                | 2              | 1 | 1 | 1 | 1 | 2              | 1 | 1 | 2                  | 2 | 1 | 2              | 2 | 1 | 20                   |
| PRO                                        | OR                                          | 32229047  | CM              | PP                | 2              | 1 | 1 | 1 | 1 | 2              | 1 | 1 | 2                  | 2 | 1 | 2              | 2 | 1 | 20                   |
| EPH                                        | OR                                          | 32259606  | MPB/MABC        | GK                | 2              | 1 | 1 | 1 | 1 | 2              | 1 | 1 | 2                  | 2 | 1 | 2              | 2 | 1 | 20                   |
| PRO                                        | OR                                          | 32276001  | CM              | EL                | 2              | 1 | 1 | 1 | 1 | 2              | 1 | 1 | 2                  | 2 | 1 | 2              | 2 | 1 | 20                   |
| IN                                         | OR                                          | 32294489  | CH              | AS                | 2              | 1 | 1 | 1 | 1 | 2              | 1 | 1 | 2                  | 2 | 1 | 2              | 2 | 1 | 20                   |

|       |    |          |          |       |   |   |   |   |   |   |   |   |   |   |   |   |   |   |    |
|-------|----|----------|----------|-------|---|---|---|---|---|---|---|---|---|---|---|---|---|---|----|
| PRO   | OR | 32300483 | CM       | AFr   | 2 | 1 | 1 | 1 | 1 | 2 | 1 | 1 | 2 | 2 | 1 | 2 | 2 | 1 | 20 |
| PRO   | OR | 32330180 | CM       | TP    | 2 | 1 | 1 | 1 | 1 | 2 | 1 | 1 | 2 | 2 | 1 | 2 | 2 | 1 | 20 |
| PED   | OR | 32347460 | LAv      | LA/JP | 2 | 1 | 1 | 1 | 1 | 2 | 1 | 1 | 2 | 2 | 1 | 2 | 2 | 1 | 20 |
| IN    | OR | 32422241 | CH       | DB    | 2 | 1 | 1 | 1 | 1 | 2 | 1 | 1 | 2 | 2 | 1 | 2 | 2 | 1 | 20 |
| EPH   | OR | 32422244 | MPB/MABC | EM    | 4 | 1 | 1 | 1 | 1 | 2 | 1 | 1 | 0 | 2 | 1 | 2 | 2 | 1 | 20 |
| COVID | OR | 32430344 | YE       | SF    | 3 | 1 | 1 | 1 | 1 | 2 | 1 | 0 | 2 | 2 | 1 | 2 | 2 | 1 | 20 |
| PED   | OR | 32433939 | LAv      | KM    | 2 | 1 | 1 | 1 | 1 | 2 | 1 | 1 | 2 | 2 | 1 | 2 | 2 | 1 | 20 |
| PRO   | OR | 32482841 | CM       | EL    | 2 | 1 | 1 | 1 | 1 | 2 | 1 | 1 | 2 | 2 | 1 | 2 | 2 | 1 | 20 |
| PRO   | OR | 32494928 | CM       | EL    | 2 | 1 | 1 | 1 | 1 | 2 | 1 | 1 | 2 | 2 | 1 | 2 | 2 | 1 | 20 |
| IN    | OR | 32502576 | CH       | DB    | 2 | 1 | 1 | 1 | 1 | 2 | 1 | 1 | 2 | 2 | 1 | 2 | 2 | 1 | 20 |
| PRE   | OR | 32522699 | DCr      | CE    | 2 | 1 | 1 | 1 | 1 | 2 | 1 | 1 | 2 | 2 | 1 | 2 | 2 | 1 | 20 |
| IN    | OR | 32549988 | CH       | DCu   | 2 | 1 | 1 | 1 | 1 | 2 | 1 | 1 | 2 | 2 | 1 | 2 | 2 | 1 | 20 |
| IN    | OR | 32551835 | CH       | JR    | 4 | 1 | 1 | 1 | 1 | 2 | 1 | 1 | 2 | 2 | 1 | 2 | 0 | 1 | 20 |
| PRO   | OR | 32553923 | CM       | PP    | 2 | 1 | 1 | 1 | 1 | 2 | 1 | 1 | 2 | 2 | 1 | 2 | 2 | 1 | 20 |
| PRO   | OR | 32568854 | CM       | TP    | 2 | 1 | 1 | 1 | 1 | 2 | 1 | 1 | 2 | 2 | 1 | 2 | 2 | 1 | 20 |
| PRO   | OR | 32586339 | CM       | AFr   | 2 | 1 | 1 | 1 | 1 | 2 | 1 | 1 | 2 | 2 | 1 | 2 | 2 | 1 | 20 |
| EPH   | OR | 32615163 | MPB/MABC | JA    | 2 | 1 | 1 | 1 | 1 | 2 | 1 | 1 | 2 | 2 | 1 | 2 | 2 | 1 | 20 |
| PRE   | OR | 32642114 | DCr      | AFe   | 4 | 1 | 1 | 1 | 1 | 2 | 1 | 1 | 2 | 2 | 1 | 2 | 0 | 1 | 20 |
| PRO   | OR | 32651293 | CM       | EL    | 2 | 1 | 1 | 1 | 1 | 2 | 1 | 1 | 2 | 2 | 1 | 2 | 2 | 1 | 20 |
| IN    | OR | 32701158 | CH       | AS    | 2 | 1 | 1 | 1 | 1 | 2 | 1 | 1 | 2 | 2 | 1 | 2 | 2 | 1 | 20 |
| PRO   | OR | 32731878 | CM       | PP    | 4 | 1 | 1 | 1 | 1 | 2 | 1 | 1 | 2 | 2 | 1 | 2 | 0 | 1 | 20 |
| IN    | OR | 32768435 | CH       | DB    | 2 | 1 | 1 | 1 | 1 | 2 | 1 | 1 | 2 | 2 | 1 | 2 | 2 | 1 | 20 |
| IN    | OR | 32876654 | CH       | DCu   | 4 | 1 | 1 | 1 | 1 | 2 | 1 | 1 | 2 | 2 | 1 | 2 | 0 | 1 | 20 |
| PRE   | OR | 32930759 | DCr      | CE    | 2 | 1 | 1 | 1 | 1 | 2 | 1 | 1 | 2 | 2 | 1 | 2 | 2 | 1 | 20 |
| PRE   | OR | 32967879 | DCr      | LB    | 2 | 1 | 1 | 1 | 1 | 2 | 1 | 1 | 2 | 2 | 1 | 2 | 2 | 1 | 20 |
| IN    | OR | 32985249 | CH       | NSh   | 4 | 1 | 1 | 1 | 1 | 2 | 1 | 1 | 2 | 2 | 1 | 2 | 0 | 1 | 20 |
| COVID | OR | 33047942 | YE       | SF    | 4 | 1 | 1 | 1 | 1 | 2 | 1 | 1 | 0 | 2 | 1 | 2 | 2 | 1 | 20 |
| PED   | OR | 33169240 | LAv      | SL    | 4 | 1 | 1 | 1 | 1 | 2 | 1 | 1 | 2 | 2 | 1 | 2 | 0 | 1 | 20 |
| IN    | OR | 33181415 | CH       | DCu   | 2 | 1 | 1 | 1 | 1 | 2 | 1 | 1 | 2 | 2 | 1 | 2 | 2 | 1 | 20 |
| EPH   | OR | 33220350 | MPB/MABC | EM    | 2 | 1 | 1 | 1 | 1 | 2 | 1 | 1 | 2 | 2 | 1 | 2 | 2 | 1 | 20 |
| PRE   | OR | 33220352 | DCr      | DCr   | 2 | 1 | 1 | 1 | 1 | 2 | 1 | 1 | 2 | 2 | 1 | 2 | 2 | 1 | 20 |
| PRE   | OR | 33221362 | DCr      | SC    | 4 | 1 | 1 | 1 | 1 | 2 | 1 | 1 | 2 | 2 | 1 | 2 | 0 | 1 | 20 |
| IN    | OR | 33225303 | CH       | DB    | 2 | 1 | 1 | 1 | 1 | 2 | 1 | 1 | 2 | 2 | 1 | 2 | 2 | 1 | 20 |
| PRE   | OR | 33309248 | DCr      | DCr   | 2 | 1 | 1 | 1 | 1 | 2 | 1 | 1 | 2 | 2 | 1 | 2 | 2 | 1 | 20 |
| PRO   | OR | 33338571 | CM       | EL    | 2 | 1 | 1 | 1 | 1 | 2 | 1 | 1 | 2 | 2 | 1 | 2 | 2 | 1 | 20 |
| IN    | OR | 33358390 | CH       | DCu   | 2 | 1 | 1 | 1 | 1 | 2 | 1 | 1 | 2 | 2 | 1 | 2 | 2 | 1 | 20 |
| EPH   | OR | 33359416 | MPB/MABC | JA    | 2 | 1 | 1 | 1 | 1 | 2 | 1 | 1 | 2 | 2 | 1 | 2 | 2 | 1 | 20 |
| PRE   | OR | 33360396 | DCr      | BC    | 2 | 1 | 1 | 1 | 1 | 2 | 1 | 1 | 2 | 2 | 1 | 2 | 2 | 1 | 20 |
| EPH   | OR | 32795597 | MPB/MABC | SC    | 4 | 1 | 1 | 1 | 1 | 2 | 1 | 1 | 2 | 2 | 1 | 0 | 2 | 1 | 20 |
| IN    | OR | 33197396 | CH       | SC    | 4 | 1 | 1 | 1 | 1 | 2 | 1 | 1 | 0 | 2 | 1 | 2 | 2 | 1 | 20 |
| PRO   | OR | 30935900 | CM       | AFr   | 2 | 1 | 1 | 1 | 1 | 2 | 0 | 1 | 2 | 2 | 1 | 2 | 2 | 1 | 19 |
| IN    | OR | 31560612 | CH       | DB    | 2 | 0 | 1 | 1 | 1 | 2 | 1 | 1 | 2 | 2 | 1 | 2 | 2 | 1 | 19 |
| EPH   | OR | 31789983 | MPB/MABC | YT    | 2 | 1 | 1 | 1 | 1 | 2 | 0 | 1 | 2 | 2 | 1 | 2 | 2 | 1 | 19 |
| PRO   | OR | 31898176 | CM       | PP    | 1 | 1 | 1 | 1 | 1 | 2 | 1 | 1 | 2 | 2 | 1 | 2 | 2 | 1 | 19 |

|     |    |          |          |     |   |   |   |   |   |   |   |   |   |   |   |   |   |   |    |
|-----|----|----------|----------|-----|---|---|---|---|---|---|---|---|---|---|---|---|---|---|----|
| IN  | OR | 31957258 | CH       | JR  | 3 | 1 | 1 | 1 | 1 | 2 | 1 | 1 | 2 | 2 | 1 | 2 | 0 | 1 | 19 |
| PRO | OR | 32004662 | CM       | PP  | 3 | 1 | 1 | 1 | 1 | 2 | 1 | 1 | 0 | 2 | 1 | 2 | 2 | 1 | 19 |
| IN  | OR | 32029415 | CH       | AS  | 3 | 1 | 1 | 1 | 1 | 2 | 1 | 1 | 2 | 2 | 0 | 2 | 2 | 0 | 19 |
| PRE | OR | 32091293 | DCr      | MB  | 3 | 1 | 1 | 1 | 1 | 2 | 1 | 1 | 2 | 2 | 1 | 2 | 0 | 1 | 19 |
| IN  | OR | 32268160 | CH       | LAI | 3 | 1 | 1 | 1 | 1 | 2 | 1 | 1 | 2 | 2 | 1 | 2 | 0 | 1 | 19 |
| EPH | OR | 32311532 | MPB/MABC | CP  | 2 | 1 | 1 | 1 | 1 | 2 | 1 | 0 | 2 | 2 | 1 | 2 | 2 | 1 | 19 |
| IN  | OR | 32322552 | CH       | MM  | 3 | 1 | 1 | 1 | 1 | 2 | 1 | 1 | 2 | 2 | 1 | 2 | 0 | 1 | 19 |
| PRO | OR | 32387318 | CM       | JN  | 2 | 1 | 1 | 1 | 1 | 2 | 0 | 1 | 2 | 2 | 1 | 2 | 2 | 1 | 19 |
| PRO | OR | 32392619 | CM       | TK  | 2 | 1 | 1 | 1 | 1 | 2 | 0 | 1 | 2 | 2 | 1 | 2 | 2 | 1 | 19 |
| PED | OR | 32422246 | LAv      | AL  | 2 | 1 | 1 | 1 | 1 | 2 | 0 | 1 | 2 | 2 | 1 | 2 | 2 | 1 | 19 |
| PRE | OR | 32427115 | DCr      | RC  | 3 | 1 | 1 | 1 | 1 | 2 | 1 | 1 | 2 | 2 | 1 | 2 | 0 | 1 | 19 |
| IN  | OR | 32433204 | CH       | DB  | 4 | 0 | 1 | 1 | 1 | 2 | 1 | 1 | 2 | 2 | 1 | 2 | 0 | 1 | 19 |
| EPH | OR | 32438992 | MPB/MABC | CP  | 2 | 1 | 1 | 1 | 1 | 2 | 1 | 0 | 2 | 2 | 1 | 2 | 2 | 1 | 19 |
| IN  | OR | 32440003 | CH       | MM  | 1 | 1 | 1 | 1 | 1 | 2 | 1 | 1 | 2 | 2 | 1 | 2 | 2 | 1 | 19 |
| EPH | OR | 32445436 | MPB/MABC | SB  | 3 | 1 | 1 | 1 | 1 | 2 | 1 | 1 | 2 | 2 | 1 | 2 | 0 | 1 | 19 |
| PED | OR | 32522702 | LAv      | NSa | 2 | 1 | 1 | 1 | 1 | 2 | 0 | 1 | 2 | 2 | 1 | 2 | 2 | 1 | 19 |
| PRO | OR | 32531403 | CM       | TP  | 2 | 1 | 1 | 1 | 1 | 2 | 0 | 1 | 2 | 2 | 1 | 2 | 2 | 1 | 19 |
| EPH | OR | 32563496 | MPB/MABC | SB  | 4 | 1 | 1 | 1 | 1 | 2 | 1 | 1 | 2 | 2 | 1 | 2 | 0 | 0 | 19 |
| PRO | OR | 32728323 | CM       | TP  | 2 | 1 | 1 | 1 | 0 | 2 | 1 | 1 | 2 | 2 | 1 | 2 | 2 | 1 | 19 |
| IN  | OR | 32895006 | CH       | MM  | 2 | 1 | 1 | 1 | 1 | 2 | 0 | 1 | 2 | 2 | 1 | 2 | 2 | 1 | 19 |
| PRE | OR | 32918419 | DCr      | BC  | 4 | 1 | 1 | 1 | 1 | 2 | 1 | 0 | 0 | 2 | 1 | 2 | 2 | 1 | 19 |
| EPH | OR | 33076963 | MPB/MABC | CP  | 2 | 1 | 1 | 1 | 0 | 2 | 1 | 1 | 2 | 2 | 1 | 2 | 2 | 1 | 19 |
| IN  | OR | 33136598 | CH       | DCu | 3 | 1 | 1 | 1 | 1 | 2 | 1 | 1 | 2 | 2 | 1 | 2 | 0 | 1 | 19 |
| IN  | OR | 33171716 | CH       | GS  | 2 | 0 | 1 | 1 | 1 | 2 | 1 | 1 | 2 | 2 | 1 | 2 | 2 | 1 | 19 |
| PRE | OR | 33308832 | DCr      | JPo | 3 | 1 | 1 | 1 | 1 | 2 | 1 | 1 | 0 | 2 | 1 | 2 | 2 | 1 | 19 |
| IN  | OR | 32851921 | CH       | SC  | 3 | 1 | 1 | 1 | 1 | 2 | 1 | 1 | 0 | 2 | 1 | 2 | 2 | 1 | 19 |
| PRE | OR | 33010371 | DCr      | SC  | 3 | 1 | 1 | 1 | 1 | 2 | 1 | 1 | 2 | 2 | 1 | 2 | 0 | 1 | 19 |
| IN  | OR | 30982559 | CH       | AS  | 2 | 1 | 1 | 1 | 1 | 2 | 1 | 1 | 2 | 2 | 1 | 2 | 0 | 1 | 18 |
| PRO | OR | 31069659 | CM       | PP  | 2 | 1 | 1 | 1 | 1 | 2 | 1 | 1 | 2 | 2 | 1 | 2 | 0 | 1 | 18 |
| PRE | OR | 31291129 | DCr      | LB  | 1 | 1 | 1 | 1 | 1 | 2 | 1 | 0 | 2 | 2 | 1 | 2 | 2 | 1 | 18 |
| IN  | OR | 31296118 | CH       | SK  | 2 | 1 | 1 | 1 | 1 | 2 | 1 | 1 | 2 | 2 | 1 | 2 | 0 | 1 | 18 |
| IN  | OR | 31303537 | CH       | LAI | 2 | 1 | 1 | 1 | 1 | 2 | 1 | 1 | 2 | 2 | 1 | 2 | 0 | 1 | 18 |
| IN  | OR | 31314693 | CH       | DCu | 2 | 1 | 1 | 1 | 1 | 2 | 1 | 1 | 2 | 2 | 1 | 2 | 0 | 1 | 18 |
| EPH | OR | 31350130 | MPB/MABC | GK  | 2 | 1 | 1 | 1 | 1 | 2 | 1 | 1 | 2 | 2 | 1 | 0 | 2 | 1 | 18 |
| IN  | OR | 31394965 | CH       | MM  | 2 | 1 | 1 | 1 | 1 | 2 | 1 | 1 | 2 | 2 | 1 | 2 | 0 | 1 | 18 |
| PRO | OR | 31411544 | CM       | PP  | 2 | 1 | 1 | 1 | 1 | 2 | 1 | 1 | 0 | 2 | 1 | 2 | 2 | 1 | 18 |
| IN  | OR | 31465539 | CH       | NSh | 1 | 1 | 1 | 1 | 1 | 2 | 0 | 1 | 2 | 2 | 1 | 2 | 2 | 1 | 18 |
| IN  | OR | 31468207 | CH       | DCu | 2 | 1 | 1 | 1 | 0 | 2 | 0 | 1 | 2 | 2 | 1 | 2 | 2 | 1 | 18 |
| IN  | OR | 31526205 | CH       | MM  | 2 | 1 | 1 | 1 | 1 | 2 | 1 | 1 | 2 | 2 | 1 | 2 | 0 | 1 | 18 |
| EPH | OR | 31578416 | MPB/MABC | GK  | 2 | 1 | 1 | 1 | 1 | 2 | 1 | 1 | 2 | 2 | 1 | 2 | 0 | 1 | 18 |
| PRE | OR | 31584640 | DCr      | MB  | 2 | 1 | 1 | 1 | 1 | 2 | 1 | 1 | 2 | 2 | 1 | 2 | 0 | 1 | 18 |
| EPH | OR | 31829773 | MPB/MABC | YT  | 2 | 1 | 1 | 1 | 1 | 0 | 1 | 1 | 2 | 2 | 1 | 2 | 2 | 1 | 18 |
| IN  | OR | 31910226 | CH       | DCu | 2 | 1 | 1 | 1 | 1 | 2 | 1 | 1 | 2 | 2 | 1 | 2 | 0 | 1 | 18 |
| IN  | OR | 31911423 | CH       | SK  | 2 | 1 | 1 | 1 | 1 | 2 | 1 | 1 | 0 | 2 | 1 | 2 | 2 | 1 | 18 |

|     |    |          |          |       |   |   |   |   |   |   |   |   |   |   |   |   |   |   |    |
|-----|----|----------|----------|-------|---|---|---|---|---|---|---|---|---|---|---|---|---|---|----|
| PRE | OR | 31912202 | DCr      | LB    | 4 | 1 | 1 | 1 | 1 | 2 | 1 | 1 | 2 | 2 | 1 | 0 | 0 | 1 | 18 |
| PRO | OR | 31926258 | CM       | PP    | 2 | 1 | 1 | 1 | 1 | 2 | 1 | 1 | 0 | 2 | 1 | 2 | 2 | 1 | 18 |
| PRE | OR | 31973778 | DCr      | BC    | 2 | 1 | 1 | 1 | 1 | 2 | 1 | 1 | 2 | 2 | 1 | 2 | 0 | 1 | 18 |
| EPH | OR | 32004667 | MPB/MABC | GK    | 2 | 1 | 1 | 1 | 1 | 2 | 1 | 1 | 2 | 2 | 1 | 2 | 0 | 1 | 18 |
| PRO | OR | 32015774 | CM       | EL    | 2 | 1 | 1 | 1 | 1 | 2 | 1 | 1 | 0 | 2 | 1 | 2 | 2 | 1 | 18 |
| EPH | OR | 32027980 | MPB/MABC | SB    | 2 | 1 | 1 | 1 | 1 | 2 | 1 | 1 | 2 | 2 | 1 | 2 | 0 | 1 | 18 |
| PRE | OR | 32035177 | DCr      | CE    | 2 | 1 | 1 | 1 | 1 | 2 | 1 | 1 | 2 | 2 | 1 | 2 | 0 | 1 | 18 |
| PRO | OR | 32044334 | CM       | SZ    | 2 | 1 | 1 | 1 | 1 | 2 | 1 | 1 | 2 | 2 | 1 | 2 | 0 | 1 | 18 |
| PRE | OR | 32045664 | DCr      | DCr   | 2 | 1 | 1 | 1 | 1 | 2 | 1 | 1 | 2 | 2 | 1 | 0 | 2 | 1 | 18 |
| IN  | OR | 32052069 | CH       | GS    | 2 | 1 | 1 | 1 | 1 | 2 | 1 | 1 | 2 | 2 | 1 | 2 | 0 | 1 | 18 |
| EPH | OR | 32069089 | MPB/MABC | GK    | 2 | 1 | 1 | 1 | 1 | 2 | 1 | 1 | 2 | 2 | 1 | 2 | 0 | 1 | 18 |
| PED | OR | 32070779 | LAv      | SL    | 2 | 1 | 1 | 1 | 1 | 2 | 1 | 1 | 2 | 2 | 1 | 2 | 0 | 1 | 18 |
| PRE | OR | 32073408 | DCr      | CE    | 4 | 1 | 1 | 1 | 1 | 2 | 1 | 1 | 2 | 2 | 1 | 0 | 0 | 1 | 18 |
| EPH | OR | 32093953 | MPB/MABC | SB    | 2 | 1 | 1 | 1 | 1 | 2 | 1 | 1 | 2 | 2 | 1 | 2 | 0 | 1 | 18 |
| IN  | OR | 32115016 | CH       | GS    | 2 | 1 | 1 | 1 | 1 | 2 | 1 | 1 | 2 | 2 | 1 | 2 | 0 | 1 | 18 |
| PRE | OR | 32146637 | DCr      | DCr   | 2 | 1 | 1 | 1 | 1 | 2 | 1 | 1 | 2 | 2 | 1 | 2 | 0 | 1 | 18 |
| PRE | OR | 32151219 | DCr      | DCr   | 2 | 1 | 1 | 1 | 1 | 2 | 1 | 1 | 2 | 2 | 1 | 2 | 0 | 1 | 18 |
| IN  | OR | 32194166 | CH       | JR    | 2 | 1 | 1 | 1 | 1 | 2 | 1 | 1 | 2 | 2 | 1 | 2 | 0 | 1 | 18 |
| IN  | OR | 32205618 | CH       | GS    | 2 | 1 | 1 | 1 | 1 | 2 | 1 | 1 | 2 | 2 | 1 | 2 | 0 | 1 | 18 |
| EPH | OR | 32207699 | MPB/MABC | SB    | 2 | 1 | 1 | 1 | 1 | 2 | 1 | 1 | 2 | 2 | 1 | 2 | 0 | 1 | 18 |
| IN  | OR | 32208830 | CH       | GS    | 2 | 1 | 1 | 1 | 1 | 2 | 1 | 1 | 2 | 2 | 1 | 2 | 0 | 1 | 18 |
| PRE | OR | 32211207 | DCr      | LB    | 2 | 1 | 1 | 1 | 1 | 2 | 1 | 1 | 2 | 2 | 1 | 2 | 0 | 1 | 18 |
| EPH | OR | 32220008 | MPB/MABC | CP    | 1 | 1 | 1 | 1 | 1 | 2 | 1 | 1 | 2 | 2 | 1 | 2 | 2 | 0 | 18 |
| PRE | OR | 32220129 | DCr      | MB    | 2 | 1 | 1 | 1 | 1 | 2 | 1 | 1 | 2 | 2 | 1 | 2 | 0 | 1 | 18 |
| PED | OR | 32228742 | LAv      | AL    | 2 | 1 | 1 | 1 | 1 | 2 | 1 | 1 | 2 | 2 | 1 | 2 | 0 | 1 | 18 |
| PRO | OR | 32242492 | CM       | AFr   | 2 | 1 | 1 | 1 | 1 | 2 | 1 | 1 | 2 | 2 | 1 | 2 | 0 | 1 | 18 |
| PED | OR | 32245979 | LAv      | ME/JH | 4 | 1 | 1 | 1 | 1 | 2 | 1 | 1 | 2 | 2 | 1 | 0 | 0 | 1 | 18 |
| PRO | OR | 32251701 | CM       | PP    | 2 | 1 | 1 | 1 | 1 | 2 | 1 | 1 | 0 | 2 | 1 | 2 | 2 | 1 | 18 |
| PRO | OR | 32295020 | CM       | PP    | 2 | 1 | 1 | 1 | 1 | 2 | 1 | 1 | 0 | 2 | 1 | 2 | 2 | 1 | 18 |
| PRO | OR | 32295717 | CM       | TP    | 2 | 1 | 1 | 1 | 1 | 2 | 1 | 1 | 0 | 2 | 1 | 2 | 2 | 1 | 18 |
| IN  | OR | 32299653 | CH       | MM    | 2 | 1 | 1 | 1 | 1 | 2 | 1 | 1 | 2 | 2 | 1 | 2 | 0 | 1 | 18 |
| IN  | OR | 32301476 | CH       | DCu   | 2 | 1 | 1 | 1 | 1 | 2 | 1 | 1 | 2 | 2 | 1 | 2 | 0 | 1 | 18 |
| PRE | OR | 32301644 | DCr      | CE    | 4 | 1 | 1 | 1 | 1 | 2 | 1 | 1 | 2 | 2 | 1 | 0 | 0 | 1 | 18 |
| PRO | OR | 32329257 | CM       | JN    | 2 | 1 | 1 | 1 | 1 | 2 | 1 | 1 | 0 | 2 | 1 | 2 | 2 | 1 | 18 |
| EPH | OR | 32341139 | MPB/MABC | CP    | 2 | 1 | 1 | 1 | 1 | 2 | 1 | 1 | 2 | 2 | 1 | 0 | 2 | 1 | 18 |
| EPH | OR | 32396569 | MPB/MABC | GK    | 2 | 1 | 1 | 1 | 1 | 2 | 1 | 1 | 2 | 2 | 1 | 2 | 0 | 1 | 18 |
| PRO | OR | 32397548 | CM       | JN    | 2 | 1 | 1 | 1 | 1 | 2 | 1 | 1 | 0 | 2 | 1 | 2 | 2 | 1 | 18 |
| PRE | OR | 32403939 | DCr      | JPo   | 2 | 1 | 1 | 1 | 1 | 2 | 1 | 1 | 0 | 2 | 1 | 2 | 2 | 1 | 18 |
| PRO | OR | 32416613 | CM       | SG    | 2 | 1 | 1 | 1 | 1 | 2 | 1 | 1 | 2 | 2 | 1 | 2 | 0 | 1 | 18 |
| PED | OR | 32418493 | LAv      | NSa   | 2 | 1 | 1 | 1 | 1 | 2 | 1 | 1 | 0 | 2 | 1 | 2 | 2 | 1 | 18 |
| EPH | OR | 32422239 | MPB/MABC | EM    | 2 | 1 | 1 | 1 | 1 | 2 | 1 | 1 | 0 | 2 | 1 | 2 | 2 | 1 | 18 |
| PRE | OR | 32422240 | DCr      | LB    | 2 | 1 | 1 | 1 | 1 | 2 | 1 | 1 | 2 | 2 | 1 | 2 | 0 | 1 | 18 |
| EPH | OR | 32422247 | MPB/MABC | EM    | 2 | 1 | 1 | 1 | 1 | 2 | 1 | 1 | 0 | 2 | 1 | 2 | 2 | 1 | 18 |
| PRO | OR | 32425878 | CM       | SZ    | 2 | 1 | 1 | 1 | 1 | 2 | 1 | 1 | 2 | 2 | 1 | 2 | 0 | 1 | 18 |

|       |    |          |          |       |   |   |   |   |   |   |   |   |   |   |   |   |   |   |    |
|-------|----|----------|----------|-------|---|---|---|---|---|---|---|---|---|---|---|---|---|---|----|
| PRO   | OR | 32445782 | CM       | JN    | 2 | 1 | 1 | 1 | 1 | 2 | 1 | 1 | 0 | 2 | 1 | 2 | 2 | 1 | 18 |
| EPH   | OR | 32446792 | MPB/MABC | JA    | 2 | 1 | 1 | 1 | 1 | 2 | 1 | 1 | 0 | 2 | 1 | 2 | 2 | 1 | 18 |
| PRE   | OR | 32458720 | DCr      | AFe   | 2 | 1 | 1 | 1 | 1 | 2 | 1 | 1 | 0 | 2 | 1 | 2 | 2 | 1 | 18 |
| PRE   | OR | 32484818 | DCr      | RC    | 2 | 1 | 1 | 1 | 1 | 2 | 1 | 1 | 0 | 2 | 1 | 2 | 2 | 1 | 18 |
| PRO   | OR | 32514590 | CM       | SZ    | 2 | 1 | 1 | 1 | 1 | 2 | 1 | 1 | 0 | 2 | 1 | 2 | 2 | 1 | 18 |
| PRE   | OR | 32522902 | DCr      | CE    | 2 | 1 | 1 | 1 | 1 | 2 | 1 | 1 | 0 | 2 | 1 | 2 | 2 | 1 | 18 |
| IN    | OR | 32527321 | CH       | NSh   | 2 | 1 | 1 | 1 | 1 | 2 | 1 | 1 | 2 | 2 | 1 | 2 | 0 | 1 | 18 |
| IN    | OR | 32552615 | CH       | NSh   | 2 | 1 | 1 | 1 | 1 | 2 | 1 | 1 | 2 | 2 | 1 | 2 | 0 | 1 | 18 |
| COVID | OR | 32558876 | YE       | MD    | 2 | 1 | 1 | 1 | 1 | 2 | 1 | 1 | 0 | 2 | 1 | 2 | 2 | 1 | 18 |
| PRE   | OR | 32574654 | DCr      | DCr   | 2 | 1 | 1 | 1 | 1 | 2 | 1 | 1 | 2 | 2 | 1 | 2 | 0 | 1 | 18 |
| PRO   | OR | 32576294 | CM       | JN    | 2 | 1 | 1 | 1 | 1 | 2 | 1 | 1 | 0 | 2 | 1 | 2 | 2 | 1 | 18 |
| IN    | OR | 32584698 | CH       | MM    | 2 | 1 | 1 | 1 | 1 | 2 | 1 | 1 | 2 | 2 | 1 | 2 | 0 | 1 | 18 |
| PRO   | OR | 32590271 | CM       | CC    | 2 | 1 | 1 | 1 | 1 | 2 | 1 | 1 | 2 | 2 | 1 | 2 | 0 | 1 | 18 |
| IN    | OR | 32599840 | CH       | GS    | 2 | 1 | 1 | 1 | 1 | 2 | 1 | 1 | 2 | 2 | 1 | 2 | 0 | 1 | 18 |
| PRE   | OR | 32616162 | DCr      | JPo   | 2 | 1 | 1 | 1 | 1 | 2 | 1 | 1 | 0 | 2 | 1 | 2 | 2 | 1 | 18 |
| PRE   | OR | 32634172 | DCr      | LB    | 4 | 1 | 1 | 1 | 1 | 2 | 1 | 1 | 0 | 2 | 1 | 2 | 0 | 1 | 18 |
| PRE   | OR | 32635700 | DCr      | BC    | 2 | 1 | 1 | 1 | 1 | 2 | 1 | 1 | 2 | 2 | 1 | 2 | 0 | 1 | 18 |
| PED   | OR | 32639467 | LAv      | ME/JH | 3 | 1 | 1 | 0 | 1 | 2 | 1 | 1 | 2 | 2 | 1 | 2 | 0 | 1 | 18 |
| EPH   | OR | 32641339 | MPB/MABC | JA    | 2 | 1 | 1 | 1 | 1 | 2 | 1 | 1 | 0 | 2 | 1 | 2 | 2 | 1 | 18 |
| PRE   | OR | 32642127 | DCr      | JPo   | 2 | 1 | 1 | 1 | 1 | 2 | 1 | 1 | 0 | 2 | 1 | 2 | 2 | 1 | 18 |
| PED   | OR | 32650928 | LAv      | ME/JH | 2 | 1 | 1 | 1 | 1 | 2 | 1 | 1 | 0 | 2 | 1 | 2 | 2 | 1 | 18 |
| IN    | OR | 32651939 | CH       | SK    | 2 | 1 | 1 | 1 | 1 | 2 | 1 | 1 | 2 | 2 | 1 | 2 | 0 | 1 | 18 |
| IN    | OR | 32658901 | CH       | NSh   | 2 | 1 | 1 | 1 | 1 | 2 | 1 | 1 | 2 | 2 | 1 | 2 | 0 | 1 | 18 |
| PRO   | OR | 32687592 | CM       | SZ    | 2 | 1 | 1 | 1 | 1 | 2 | 1 | 1 | 2 | 2 | 1 | 0 | 2 | 1 | 18 |
| EPH   | OR | 32708363 | MPB/MABC | JA    | 2 | 1 | 1 | 1 | 1 | 2 | 1 | 1 | 0 | 2 | 1 | 2 | 2 | 1 | 18 |
| PRO   | OR | 32758271 | CM       | TR    | 2 | 1 | 1 | 1 | 1 | 2 | 1 | 1 | 0 | 2 | 1 | 2 | 2 | 1 | 18 |
| PRE   | OR | 32802513 | DCr      | CE    | 2 | 1 | 1 | 1 | 1 | 2 | 1 | 1 | 2 | 2 | 1 | 2 | 0 | 1 | 18 |
| PRO   | OR | 32852582 | CM       | JN    | 4 | 1 | 1 | 1 | 1 | 2 | 1 | 1 | 0 | 2 | 1 | 0 | 2 | 1 | 18 |
| PRO   | OR | 32872055 | CM       | AFr   | 2 | 1 | 1 | 1 | 1 | 2 | 1 | 1 | 2 | 2 | 1 | 2 | 0 | 1 | 18 |
| EPH   | OR | 32879735 | MPB/MABC | YT    | 2 | 1 | 1 | 1 | 1 | 2 | 1 | 1 | 0 | 2 | 1 | 2 | 2 | 1 | 18 |
| PRO   | OR | 32885107 | CM       | TK    | 2 | 1 | 1 | 1 | 1 | 2 | 1 | 1 | 2 | 2 | 1 | 2 | 0 | 1 | 18 |
| EPH   | OR | 32920114 | MPB/MABC | GK    | 2 | 1 | 1 | 1 | 1 | 2 | 1 | 1 | 2 | 2 | 1 | 0 | 2 | 1 | 18 |
| PRE   | OR | 32925478 | DCr      | BC    | 4 | 1 | 1 | 1 | 1 | 2 | 1 | 1 | 0 | 2 | 1 | 2 | 0 | 1 | 18 |
| PRE   | OR | 32949675 | DCr      | LB    | 2 | 1 | 1 | 1 | 1 | 2 | 1 | 1 | 0 | 2 | 1 | 2 | 2 | 1 | 18 |
| EPH   | OR | 32972428 | MPB/MABC | JA    | 2 | 1 | 1 | 1 | 1 | 2 | 1 | 1 | 0 | 2 | 1 | 2 | 2 | 1 | 18 |
| IN    | OR | 32998828 | CH       | MM    | 2 | 1 | 1 | 1 | 1 | 2 | 1 | 1 | 2 | 2 | 1 | 2 | 0 | 1 | 18 |
| PED   | OR | 33005733 | LAv      | NA    | 3 | 1 | 1 | 1 | 1 | 2 | 0 | 1 | 2 | 2 | 1 | 2 | 0 | 1 | 18 |
| PRE   | OR | 33021857 | DCr      | RC    | 2 | 1 | 1 | 1 | 1 | 2 | 1 | 1 | 0 | 2 | 1 | 2 | 2 | 1 | 18 |
| IN    | OR | 33023615 | CH       | LAI   | 2 | 1 | 1 | 1 | 1 | 2 | 1 | 1 | 2 | 2 | 1 | 2 | 0 | 1 | 18 |
| PRE   | OR | 33026273 | DCr      | DCr   | 2 | 1 | 1 | 1 | 1 | 2 | 1 | 1 | 2 | 2 | 1 | 2 | 0 | 1 | 18 |
| EPH   | OR | 33028067 | MPB/MABC | SB    | 2 | 1 | 1 | 1 | 1 | 2 | 1 | 1 | 2 | 2 | 1 | 0 | 2 | 1 | 18 |
| IN    | OR | 33028425 | CH       | NSh   | 4 | 1 | 1 | 1 | 1 | 2 | 1 | 1 | 2 | 2 | 1 | 0 | 0 | 1 | 18 |
| IN    | OR | 33038438 | CH       | SK    | 4 | 1 | 1 | 1 | 1 | 2 | 1 | 1 | 2 | 2 | 1 | 0 | 0 | 1 | 18 |
| EPH   | OR | 33094661 | MPB/MABC | JA    | 2 | 1 | 1 | 1 | 1 | 2 | 1 | 1 | 2 | 2 | 1 | 0 | 2 | 1 | 18 |

|     |    |          |          |     |   |   |   |   |   |   |   |   |   |   |   |   |   |   |    |
|-----|----|----------|----------|-----|---|---|---|---|---|---|---|---|---|---|---|---|---|---|----|
| PRE | OR | 33103542 | DCr      | DCr | 2 | 1 | 1 | 1 | 1 | 2 | 1 | 1 | 0 | 2 | 1 | 2 | 2 | 1 | 18 |
| PRE | OR | 33138109 | DCr      | JPo | 4 | 1 | 1 | 1 | 1 | 2 | 1 | 1 | 0 | 2 | 1 | 2 | 0 | 1 | 18 |
| EPH | OR | 33142165 | MPB/MABC | GK  | 2 | 1 | 1 | 1 | 1 | 2 | 1 | 1 | 2 | 2 | 1 | 2 | 0 | 1 | 18 |
| PRE | OR | 33151108 | DCr      | RC  | 2 | 1 | 1 | 1 | 1 | 2 | 1 | 1 | 0 | 2 | 1 | 2 | 2 | 1 | 18 |
| EPH | OR | 33156868 | MPB/MABC | EM  | 2 | 1 | 1 | 1 | 1 | 2 | 1 | 1 | 0 | 2 | 1 | 2 | 2 | 1 | 18 |
| PRE | OR | 33163534 | DCr      | AFe | 4 | 1 | 1 | 1 | 1 | 2 | 1 | 1 | 0 | 2 | 1 | 2 | 0 | 1 | 18 |
| PRE | OR | 33181229 | DCr      | DCr | 2 | 1 | 1 | 1 | 1 | 2 | 1 | 1 | 2 | 2 | 1 | 2 | 0 | 1 | 18 |
| PRE | OR | 33181232 | DCr      | MB  | 2 | 1 | 1 | 1 | 1 | 2 | 1 | 1 | 2 | 2 | 1 | 2 | 0 | 1 | 18 |
| PRO | OR | 33186992 | CM       | AFr | 2 | 1 | 1 | 1 | 1 | 2 | 1 | 1 | 2 | 2 | 1 | 2 | 0 | 1 | 18 |
| IN  | OR | 33189803 | CH       | SK  | 2 | 1 | 1 | 1 | 1 | 2 | 1 | 1 | 2 | 2 | 1 | 2 | 0 | 1 | 18 |
| PRE | OR | 33189805 | DCr      | RC  | 2 | 1 | 1 | 1 | 1 | 2 | 1 | 1 | 2 | 2 | 1 | 2 | 0 | 1 | 18 |
| EPH | OR | 33189807 | MPB/MABC | JA  | 2 | 1 | 1 | 1 | 1 | 2 | 1 | 1 | 0 | 2 | 1 | 2 | 2 | 1 | 18 |
| PRE | OR | 33200285 | DCr      | DCr | 2 | 1 | 1 | 1 | 1 | 0 | 1 | 1 | 2 | 2 | 1 | 2 | 2 | 1 | 18 |
| PRO | OR | 33204363 | CM       | SC  | 2 | 1 | 1 | 1 | 1 | 2 | 1 | 1 | 2 | 2 | 1 | 2 | 0 | 1 | 18 |
| PED | OR | 33208547 | LAv      | AL  | 2 | 1 | 1 | 1 | 1 | 2 | 1 | 1 | 2 | 2 | 1 | 2 | 0 | 1 | 18 |
| PRE | OR | 33221356 | DCr      | BC  | 2 | 1 | 1 | 1 | 1 | 2 | 1 | 1 | 2 | 2 | 1 | 2 | 0 | 1 | 18 |
| PRO | OR | 33225452 | CM       | AFr | 2 | 1 | 1 | 1 | 1 | 2 | 1 | 1 | 2 | 2 | 1 | 2 | 0 | 1 | 18 |
| IN  | OR | 33227591 | CH       | LAL | 2 | 1 | 1 | 1 | 1 | 2 | 1 | 1 | 2 | 2 | 1 | 2 | 0 | 1 | 18 |
| PRO | OR | 33232752 | CM       | TR  | 2 | 1 | 1 | 1 | 1 | 2 | 1 | 1 | 0 | 2 | 1 | 2 | 2 | 1 | 18 |
| IN  | OR | 33243530 | CH       | AS  | 2 | 1 | 1 | 1 | 1 | 2 | 1 | 1 | 2 | 2 | 1 | 2 | 0 | 1 | 18 |
| PRE | OR | 33253768 | DCr      | AFe | 2 | 1 | 1 | 1 | 1 | 2 | 1 | 1 | 2 | 2 | 1 | 2 | 0 | 1 | 18 |
| IN  | OR | 33259488 | CH       | GS  | 2 | 1 | 1 | 1 | 1 | 2 | 1 | 1 | 2 | 2 | 1 | 2 | 0 | 1 | 18 |
| PRE | OR | 33275864 | DCr      | DCr | 2 | 1 | 1 | 1 | 1 | 2 | 1 | 1 | 2 | 2 | 1 | 2 | 0 | 1 | 18 |
| PRE | OR | 33278521 | DCr      | CE  | 2 | 1 | 1 | 1 | 1 | 2 | 1 | 1 | 2 | 2 | 1 | 2 | 0 | 1 | 18 |
| EPH | OR | 33278522 | MPB/MABC | YT  | 2 | 1 | 1 | 1 | 1 | 2 | 1 | 1 | 0 | 2 | 1 | 2 | 2 | 1 | 18 |
| PRE | OR | 33307157 | DCr      | MB  | 2 | 1 | 1 | 1 | 1 | 2 | 1 | 1 | 2 | 2 | 1 | 0 | 2 | 1 | 18 |
| IN  | OR | 33318804 | CH       | DCu | 2 | 1 | 1 | 1 | 1 | 2 | 1 | 1 | 2 | 2 | 1 | 2 | 0 | 1 | 18 |
| PRE | OR | 33326454 | DCr      | JPo | 2 | 1 | 1 | 1 | 1 | 2 | 1 | 1 | 2 | 2 | 1 | 0 | 2 | 1 | 18 |
| PED | OR | 33334965 | LAv      | NA  | 3 | 1 | 1 | 0 | 1 | 2 | 1 | 1 | 2 | 2 | 1 | 2 | 0 | 1 | 18 |
| IN  | OR | 33342200 | CH       | DCu | 2 | 1 | 1 | 1 | 1 | 2 | 1 | 1 | 2 | 2 | 1 | 2 | 0 | 1 | 18 |
| PRE | OR | 33345465 | DCr      | MB  | 2 | 1 | 1 | 1 | 1 | 2 | 1 | 1 | 0 | 2 | 1 | 2 | 2 | 1 | 18 |
| PRO | OR | 33360013 | CM       | PP  | 2 | 1 | 1 | 1 | 1 | 2 | 1 | 1 | 2 | 2 | 1 | 2 | 0 | 1 | 18 |
| PED | OR | 33360395 | LAv      | AL  | 2 | 1 | 1 | 1 | 1 | 2 | 1 | 1 | 2 | 2 | 1 | 2 | 0 | 1 | 18 |
| IN  | OR | 33385885 | CH       | JR  | 2 | 1 | 1 | 1 | 1 | 2 | 1 | 1 | 2 | 2 | 1 | 2 | 0 | 1 | 18 |
| PRE | OR | 33387930 | DCr      | LB  | 2 | 1 | 1 | 1 | 1 | 2 | 1 | 1 | 2 | 2 | 1 | 0 | 2 | 1 | 18 |
| EPH | OR | 33387932 | MPB/MABC | JA  | 2 | 1 | 1 | 1 | 1 | 2 | 1 | 1 | 0 | 2 | 1 | 2 | 2 | 1 | 18 |
| IN  | OR | 32707144 | CH       | SC  | 2 | 1 | 1 | 1 | 1 | 2 | 1 | 1 | 0 | 2 | 1 | 2 | 2 | 1 | 18 |
| PRE | OR | 32739129 | DCr      | SC  | 2 | 1 | 1 | 1 | 1 | 2 | 1 | 1 | 2 | 2 | 1 | 2 | 0 | 1 | 18 |
| PRE | OR | 33205692 | DCr      | SC  | 2 | 1 | 1 | 1 | 1 | 2 | 1 | 1 | 2 | 2 | 1 | 2 | 0 | 1 | 18 |
| PRO | OR | 33191208 | CM       | SC  | 2 | 1 | 1 | 1 | 1 | 2 | 1 | 1 | 2 | 2 | 1 | 2 | 0 | 1 | 18 |
| PRE | OR | 31144648 | DCr      | DCr | 2 | 1 | 1 | 1 | 1 | 2 | 1 | 0 | 2 | 2 | 1 | 2 | 0 | 1 | 17 |
| PRE | OR | 31166220 | DCr      | LB  | 2 | 1 | 1 | 1 | 1 | 2 | 1 | 0 | 2 | 2 | 1 | 2 | 0 | 1 | 17 |
| IN  | OR | 31486571 | CH       | MM  | 2 | 1 | 1 | 1 | 1 | 2 | 0 | 1 | 2 | 2 | 1 | 2 | 0 | 1 | 17 |
| IN  | OR | 31633449 | CH       | DB  | 2 | 0 | 1 | 1 | 1 | 2 | 1 | 1 | 2 | 2 | 1 | 2 | 0 | 1 | 17 |

|       |    |          |          |       |   |   |   |   |   |   |   |   |   |   |   |   |   |   |    |
|-------|----|----------|----------|-------|---|---|---|---|---|---|---|---|---|---|---|---|---|---|----|
| PRE   | OR | 31855467 | DCr      | AFe   | 3 | 1 | 1 | 1 | 1 | 2 | 1 | 1 | 0 | 2 | 1 | 2 | 0 | 1 | 17 |
| IN    | OR | 31893427 | CH       | SK    | 1 | 1 | 1 | 1 | 1 | 2 | 1 | 1 | 2 | 0 | 1 | 2 | 2 | 1 | 17 |
| IN    | OR | 31906329 | CH       | AS    | 2 | 1 | 1 | 1 | 0 | 2 | 1 | 1 | 2 | 2 | 1 | 2 | 0 | 1 | 17 |
| PRO   | OR | 31919808 | CM       | CC    | 1 | 1 | 1 | 1 | 1 | 2 | 1 | 1 | 0 | 2 | 1 | 2 | 2 | 1 | 17 |
| EPH   | OR | 31928173 | MPB/MABC | JA    | 1 | 1 | 1 | 1 | 1 | 2 | 1 | 1 | 0 | 2 | 1 | 2 | 2 | 1 | 17 |
| PED   | OR | 31939509 | LAv      | ME/JH | 2 | 1 | 1 | 1 | 1 | 2 | 1 | 1 | 2 | 2 | 1 | 2 | 0 | 0 | 17 |
| PRO   | OR | 31939809 | CM       | SG    | 1 | 1 | 1 | 1 | 1 | 2 | 1 | 1 | 2 | 2 | 1 | 0 | 2 | 1 | 17 |
| PED   | OR | 31941988 | LAv      | ME/JH | 3 | 1 | 1 | 1 | 1 | 2 | 1 | 1 | 2 | 2 | 1 | 0 | 0 | 1 | 17 |
| IN    | OR | 31945424 | CH       | MM    | 2 | 1 | 1 | 1 | 1 | 0 | 0 | 1 | 2 | 2 | 1 | 2 | 2 | 1 | 17 |
| PED   | OR | 31954741 | LAv      | NA    | 2 | 1 | 1 | 1 | 1 | 2 | 1 | 1 | 2 | 2 | 1 | 2 | 0 | 0 | 17 |
| PRE   | OR | 31958102 | DCr      | DCr   | 2 | 1 | 1 | 1 | 0 | 2 | 1 | 1 | 2 | 2 | 1 | 2 | 0 | 1 | 17 |
| PRO   | OR | 31987887 | CM       | JN    | 2 | 1 | 1 | 1 | 1 | 2 | 0 | 1 | 0 | 2 | 1 | 2 | 2 | 1 | 17 |
| IN    | OR | 32004079 | CH       | MM    | 1 | 1 | 1 | 1 | 1 | 2 | 1 | 1 | 2 | 2 | 1 | 2 | 0 | 1 | 17 |
| PRO   | OR | 32004080 | CM       | SZ    | 2 | 1 | 1 | 1 | 1 | 2 | 0 | 1 | 2 | 2 | 1 | 2 | 0 | 1 | 17 |
| IN    | OR | 32004666 | CH       | DCu   | 2 | 1 | 1 | 1 | 1 | 2 | 0 | 1 | 2 | 2 | 1 | 2 | 0 | 1 | 17 |
| EPH   | OR | 32029343 | MPB/MABC | GK    | 2 | 1 | 1 | 1 | 1 | 2 | 1 | 0 | 2 | 2 | 1 | 2 | 0 | 1 | 17 |
| PRO   | OR | 32043140 | CM       | AFr   | 1 | 1 | 1 | 1 | 1 | 2 | 1 | 1 | 2 | 2 | 1 | 2 | 0 | 1 | 17 |
| IN    | OR | 32087257 | CH       | LAI   | 4 | 1 | 1 | 1 | 1 | 2 | 1 | 1 | 2 | 2 | 1 | 0 | 0 | 0 | 17 |
| IN    | OR | 32102640 | CH       | DCu   | 2 | 1 | 1 | 1 | 1 | 2 | 0 | 1 | 2 | 2 | 1 | 2 | 0 | 1 | 17 |
| PED   | OR | 32103031 | LAv      | KM    | 1 | 1 | 1 | 1 | 1 | 2 | 1 | 1 | 2 | 2 | 1 | 2 | 0 | 1 | 17 |
| PRO   | OR | 32104730 | CM       | TK    | 2 | 1 | 1 | 1 | 1 | 2 | 0 | 1 | 0 | 2 | 1 | 2 | 2 | 1 | 17 |
| IN    | OR | 32107069 | CH       | LAI   | 2 | 1 | 1 | 1 | 1 | 2 | 1 | 1 | 2 | 2 | 1 | 2 | 0 | 0 | 17 |
| EPH   | OR | 32111405 | MPB/MABC | GK    | 2 | 1 | 1 | 1 | 1 | 2 | 1 | 0 | 2 | 2 | 1 | 2 | 0 | 1 | 17 |
| IN    | OR | 32118377 | CH       | MM    | 2 | 1 | 1 | 1 | 1 | 2 | 1 | 1 | 2 | 2 | 1 | 2 | 0 | 0 | 17 |
| EPH   | OR | 32126247 | MPB/MABC | JA    | 2 | 1 | 1 | 1 | 1 | 0 | 0 | 1 | 2 | 2 | 1 | 2 | 2 | 1 | 17 |
| IN    | OR | 32150050 | CH       | GS    | 2 | 1 | 1 | 1 | 1 | 2 | 1 | 1 | 2 | 2 | 0 | 2 | 0 | 1 | 17 |
| IN    | OR | 32166289 | CH       | GS    | 3 | 1 | 1 | 1 | 1 | 2 | 1 | 1 | 2 | 0 | 1 | 2 | 0 | 1 | 17 |
| IN    | OR | 32209378 | CH       | LAI   | 2 | 1 | 1 | 1 | 1 | 2 | 1 | 1 | 2 | 2 | 0 | 2 | 0 | 1 | 17 |
| EPH   | OR | 32222419 | MPB/MABC | JA    | 2 | 1 | 1 | 1 | 1 | 2 | 0 | 1 | 0 | 2 | 1 | 2 | 2 | 1 | 17 |
| IN    | OR | 32229218 | CH       | JR    | 3 | 1 | 1 | 1 | 1 | 2 | 1 | 1 | 2 | 2 | 1 | 0 | 0 | 1 | 17 |
| IN    | OR | 32269996 | CH       | JR    | 2 | 1 | 1 | 1 | 1 | 2 | 1 | 1 | 2 | 2 | 1 | 2 | 0 | 0 | 17 |
| PRO   | OR | 32274152 | CM       | EL    | 2 | 0 | 1 | 1 | 1 | 2 | 1 | 1 | 0 | 2 | 1 | 2 | 2 | 1 | 17 |
| PRO   | OR | 32305260 | CM       | AFr   | 2 | 1 | 1 | 1 | 1 | 2 | 0 | 1 | 0 | 2 | 1 | 2 | 2 | 1 | 17 |
| PRE   | OR | 32308508 | DCr      | BC    | 1 | 1 | 1 | 1 | 1 | 2 | 1 | 1 | 2 | 2 | 1 | 0 | 2 | 1 | 17 |
| EPH   | OR | 32308520 | MPB/MABC | YT    | 1 | 1 | 1 | 1 | 1 | 2 | 1 | 1 | 2 | 2 | 1 | 2 | 0 | 1 | 17 |
| PED   | OR | 32355972 | LAv      | KM    | 1 | 1 | 1 | 1 | 1 | 2 | 1 | 1 | 2 | 2 | 1 | 2 | 0 | 1 | 17 |
| EPH   | OR | 32385129 | MPB/MABC | YT    | 2 | 1 | 1 | 1 | 1 | 2 | 0 | 1 | 0 | 2 | 1 | 2 | 2 | 1 | 17 |
| PRE   | OR | 32396128 | DCr      | RC    | 2 | 1 | 0 | 1 | 1 | 2 | 1 | 1 | 2 | 2 | 1 | 2 | 0 | 1 | 17 |
| PRE   | OR | 32444161 | DCr      | JPo   | 3 | 1 | 1 | 1 | 1 | 2 | 1 | 1 | 2 | 2 | 1 | 0 | 0 | 1 | 17 |
| IN    | OR | 32445610 | CH       | DCu   | 2 | 1 | 1 | 1 | 1 | 2 | 0 | 1 | 2 | 2 | 1 | 2 | 0 | 1 | 17 |
| PED   | OR | 32453255 | LAv      | AH    | 1 | 0 | 1 | 1 | 1 | 2 | 1 | 0 | 2 | 2 | 1 | 2 | 2 | 1 | 17 |
| IN    | OR | 32485327 | CH       | DB    | 2 | 0 | 1 | 1 | 1 | 2 | 1 | 1 | 2 | 2 | 1 | 2 | 0 | 1 | 17 |
| IN    | OR | 32489405 | CH       | SK    | 1 | 1 | 1 | 1 | 1 | 2 | 1 | 1 | 2 | 2 | 1 | 2 | 0 | 1 | 17 |
| COVID | OR | 32496811 | YE       | MD    | 2 | 1 | 1 | 1 | 1 | 2 | 0 | 1 | 0 | 2 | 1 | 2 | 2 | 1 | 17 |

|       |    |          |          |       |   |   |   |   |   |   |   |   |   |   |   |   |   |   |    |
|-------|----|----------|----------|-------|---|---|---|---|---|---|---|---|---|---|---|---|---|---|----|
| PRE   | OR | 32502575 | DCr      | BC    | 2 | 1 | 1 | 1 | 1 | 2 | 1 | 0 | 0 | 2 | 1 | 2 | 2 | 1 | 17 |
| PRO   | OR | 32504821 | CM       | TP    | 2 | 1 | 1 | 1 | 1 | 2 | 0 | 1 | 0 | 2 | 1 | 2 | 2 | 1 | 17 |
| PRO   | OR | 32505869 | CM       | EL    | 2 | 1 | 1 | 1 | 1 | 2 | 1 | 1 | 2 | 2 | 1 | 2 | 0 | 0 | 17 |
| IN    | OR | 32521045 | CH       | AS    | 2 | 1 | 1 | 1 | 1 | 2 | 0 | 1 | 2 | 2 | 1 | 2 | 0 | 1 | 17 |
| EPH   | OR | 32532235 | MPB/MABC | JA    | 1 | 1 | 1 | 1 | 1 | 2 | 1 | 1 | 0 | 2 | 1 | 2 | 2 | 1 | 17 |
| COVID | OR | 32562486 | YE       | MD    | 2 | 1 | 1 | 1 | 1 | 2 | 0 | 1 | 0 | 2 | 1 | 2 | 2 | 1 | 17 |
| IN    | OR | 32570657 | CH       | SK    | 1 | 1 | 1 | 1 | 1 | 2 | 1 | 1 | 2 | 2 | 1 | 2 | 0 | 1 | 17 |
| IN    | OR | 32624168 | CH       | JR    | 2 | 1 | 1 | 1 | 1 | 2 | 1 | 0 | 2 | 2 | 1 | 2 | 0 | 1 | 17 |
| PRE   | OR | 32627636 | DCr      | RC    | 3 | 1 | 1 | 1 | 1 | 2 | 1 | 1 | 0 | 2 | 1 | 2 | 0 | 1 | 17 |
| PED   | OR | 32638618 | LAv      | AH    | 3 | 1 | 1 | 1 | 1 | 2 | 1 | 1 | 2 | 2 | 1 | 0 | 0 | 1 | 17 |
| EPH   | OR | 32695737 | MPB/MABC | YT    | 3 | 1 | 1 | 1 | 1 | 2 | 1 | 1 | 0 | 2 | 1 | 2 | 0 | 1 | 17 |
| PRE   | OR | 32801977 | DCr      | AFe   | 3 | 1 | 1 | 1 | 1 | 2 | 1 | 1 | 0 | 2 | 1 | 2 | 0 | 1 | 17 |
| PRE   | OR | 32808100 | DCr      | JPo   | 3 | 1 | 1 | 1 | 1 | 2 | 1 | 1 | 0 | 2 | 1 | 2 | 0 | 1 | 17 |
| PRO   | OR | 32839077 | CM       | PP    | 3 | 1 | 1 | 1 | 1 | 2 | 1 | 1 | 0 | 2 | 1 | 2 | 0 | 1 | 17 |
| PED   | OR | 32912284 | LAv      | ME/JH | 3 | 1 | 1 | 1 | 1 | 2 | 1 | 1 | 2 | 2 | 1 | 0 | 0 | 1 | 17 |
| PED   | OR | 32917447 | LAv      | DO    | 2 | 1 | 1 | 1 | 1 | 2 | 1 | 0 | 2 | 2 | 1 | 2 | 0 | 1 | 17 |
| PRE   | OR | 33007308 | DCr      | CE    | 2 | 0 | 1 | 1 | 1 | 2 | 1 | 1 | 0 | 2 | 1 | 2 | 2 | 1 | 17 |
| PRO   | OR | 33009041 | CM       | SZ    | 2 | 1 | 1 | 0 | 1 | 2 | 1 | 1 | 2 | 2 | 1 | 2 | 0 | 1 | 17 |
| PRE   | OR | 33039236 | DCr      | AFe   | 3 | 1 | 1 | 1 | 1 | 2 | 1 | 1 | 0 | 2 | 1 | 2 | 0 | 1 | 17 |
| PRE   | OR | 33080730 | DCr      | BC    | 3 | 1 | 1 | 1 | 1 | 2 | 1 | 1 | 0 | 2 | 1 | 2 | 0 | 1 | 17 |
| EPH   | OR | 33101886 | MPB/MABC | JA    | 1 | 1 | 1 | 1 | 1 | 2 | 1 | 1 | 0 | 2 | 1 | 2 | 2 | 1 | 17 |
| EPH   | OR | 33189804 | MPB/MABC | YT    | 2 | 1 | 1 | 1 | 1 | 2 | 0 | 1 | 2 | 2 | 1 | 0 | 2 | 1 | 17 |
| EPH   | OR | 33189806 | MPB/MABC | JA    | 2 | 1 | 1 | 0 | 1 | 2 | 1 | 1 | 0 | 2 | 1 | 2 | 2 | 1 | 17 |
| PED   | OR | 33214515 | LAv      | ME/JH | 3 | 1 | 1 | 1 | 1 | 2 | 1 | 1 | 2 | 2 | 1 | 0 | 0 | 1 | 17 |
| IN    | OR | 33218192 | CH       | JR    | 2 | 1 | 1 | 1 | 1 | 2 | 1 | 1 | 2 | 2 | 1 | 2 | 0 | 0 | 17 |
| EPH   | OR | 33219108 | MPB/MABC | GK    | 2 | 1 | 1 | 1 | 1 | 2 | 1 | 1 | 2 | 2 | 1 | 2 | 0 | 0 | 17 |
| PRE   | OR | 33235109 | DCr      | AFe   | 3 | 1 | 1 | 1 | 1 | 2 | 1 | 1 | 0 | 2 | 1 | 2 | 0 | 1 | 17 |
| PRE   | OR | 33252342 | DCr      | CE    | 1 | 1 | 1 | 1 | 1 | 2 | 1 | 1 | 0 | 2 | 1 | 2 | 2 | 1 | 17 |
| IN    | OR | 33264500 | CH       | AS    | 2 | 1 | 1 | 1 | 1 | 2 | 0 | 1 | 2 | 2 | 1 | 2 | 0 | 1 | 17 |
| PRO   | OR | 33301887 | CM       | AFr   | 4 | 1 | 1 | 1 | 1 | 2 | 0 | 1 | 0 | 2 | 1 | 2 | 0 | 1 | 17 |
| EPH   | OR | 33314377 | MPB/MABC | EM    | 1 | 1 | 1 | 1 | 1 | 2 | 1 | 1 | 0 | 2 | 1 | 2 | 2 | 1 | 17 |
| PRE   | OR | 33325325 | DCr      | AFe   | 3 | 1 | 1 | 1 | 1 | 2 | 1 | 1 | 0 | 2 | 1 | 2 | 0 | 1 | 17 |
| PRE   | OR | 33380330 | DCr      | BC    | 3 | 1 | 1 | 1 | 1 | 2 | 1 | 1 | 2 | 2 | 1 | 0 | 0 | 1 | 17 |
| IN    | OR | 33383268 | CH       | SK    | 1 | 1 | 1 | 1 | 1 | 2 | 1 | 1 | 0 | 2 | 1 | 2 | 2 | 1 | 17 |
| PRE   | OR | 32721415 | DCr      | SC    | 3 | 1 | 1 | 1 | 1 | 2 | 1 | 1 | 2 | 2 | 1 | 0 | 0 | 1 | 17 |
| PED   | OR | 30681441 | LAv      | DO    | 2 | 1 | 1 | 1 | 1 | 2 | 1 | 1 | 2 | 2 | 1 | 0 | 0 | 1 | 16 |
| EPH   | OR | 31311316 | MPB/MABC | CP    | 2 | 1 | 1 | 1 | 1 | 2 | 1 | 1 | 2 | 2 | 1 | 0 | 0 | 1 | 16 |
| PRE   | OR | 31400888 | DCr      | JPo   | 2 | 1 | 1 | 1 | 1 | 2 | 1 | 1 | 2 | 2 | 1 | 0 | 0 | 1 | 16 |
| PRE   | OR | 31412291 | DCr      | CE    | 2 | 1 | 1 | 1 | 1 | 2 | 1 | 1 | 2 | 2 | 1 | 0 | 0 | 1 | 16 |
| IN    | OR | 31414970 | CH       | GS    | 2 | 1 | 1 | 1 | 1 | 2 | 1 | 1 | 2 | 0 | 1 | 2 | 0 | 1 | 16 |
| PRE   | OR | 31466139 | DCr      | CE    | 2 | 1 | 1 | 1 | 1 | 2 | 1 | 1 | 2 | 2 | 1 | 0 | 0 | 1 | 16 |
| PRO   | OR | 31615270 | CM       | TP    | 2 | 1 | 1 | 1 | 1 | 0 | 1 | 1 | 2 | 2 | 1 | 2 | 0 | 1 | 16 |
| PRE   | OR | 31686571 | DCr      | RC    | 2 | 1 | 1 | 1 | 1 | 2 | 1 | 1 | 0 | 2 | 1 | 2 | 0 | 1 | 16 |
| PRE   | OR | 31864867 | DCr      | CE    | 2 | 1 | 1 | 1 | 1 | 2 | 1 | 1 | 2 | 2 | 1 | 0 | 0 | 1 | 16 |



|     |    |          |          |       |   |   |   |   |   |   |   |   |   |   |   |   |   |   |    |
|-----|----|----------|----------|-------|---|---|---|---|---|---|---|---|---|---|---|---|---|---|----|
| PED | OR | 31895976 | LAv      | SL    | 2 | 1 | 1 | 1 | 1 | 2 | 1 | 1 | 0 | 2 | 1 | 2 | 0 | 1 | 16 |
| PRE | OR | 31926962 | DCr      | BC    | 2 | 1 | 1 | 1 | 1 | 2 | 1 | 1 | 2 | 2 | 1 | 0 | 0 | 1 | 16 |
| PRO | OR | 31931093 | CM       | EL    | 2 | 1 | 1 | 1 | 1 | 2 | 1 | 1 | 0 | 2 | 1 | 2 | 0 | 1 | 16 |
| PRO | OR | 31940337 | CM       | TK    | 2 | 1 | 1 | 1 | 1 | 2 | 1 | 1 | 0 | 2 | 1 | 2 | 0 | 1 | 16 |
| IN  | OR | 31945429 | CH       | DCu   | 2 | 1 | 1 | 1 | 1 | 2 | 1 | 1 | 2 | 2 | 1 | 0 | 0 | 1 | 16 |
| PED | OR | 31948649 | LAv      | DO    | 2 | 1 | 1 | 1 | 1 | 2 | 1 | 1 | 2 | 2 | 1 | 0 | 0 | 1 | 16 |
| EPH | OR | 31956145 | MPB/MABC | EM    | 2 | 1 | 1 | 1 | 1 | 2 | 1 | 1 | 0 | 2 | 1 | 0 | 2 | 1 | 16 |
| PRE | OR | 31962177 | DCr      | DCr   | 2 | 1 | 1 | 1 | 1 | 2 | 1 | 1 | 2 | 2 | 1 | 0 | 0 | 1 | 16 |
| IN  | OR | 31967987 | CH       | LAI   | 2 | 1 | 1 | 0 | 1 | 2 | 1 | 0 | 0 | 2 | 1 | 2 | 2 | 1 | 16 |
| PRE | OR | 31980268 | DCr      | BC    | 2 | 1 | 1 | 1 | 1 | 2 | 1 | 1 | 0 | 2 | 1 | 2 | 0 | 1 | 16 |
| IN  | OR | 32001120 | CH       | DB    | 2 | 0 | 1 | 1 | 1 | 2 | 1 | 0 | 2 | 2 | 1 | 2 | 0 | 1 | 16 |
| PED | OR | 32016433 | LAv      | NSa   | 2 | 1 | 1 | 1 | 1 | 2 | 0 | 1 | 2 | 2 | 1 | 2 | 0 | 0 | 16 |
| IN  | OR | 32023298 | CH       | LAI   | 2 | 1 | 1 | 1 | 1 | 2 | 1 | 1 | 2 | 2 | 1 | 0 | 0 | 1 | 16 |
| IN  | OR | 32032651 | CH       | DCu   | 2 | 1 | 1 | 1 | 1 | 2 | 1 | 1 | 2 | 2 | 1 | 0 | 0 | 1 | 16 |
| PED | OR | 32036023 | LAv      | AL    | 2 | 1 | 1 | 1 | 1 | 2 | 1 | 1 | 2 | 2 | 1 | 0 | 0 | 1 | 16 |
| PED | OR | 32039107 | LAv      | AH    | 2 | 1 | 1 | 1 | 1 | 2 | 1 | 1 | 2 | 2 | 1 | 0 | 0 | 1 | 16 |
| EPH | OR | 32048115 | MPB/MABC | GK    | 2 | 1 | 1 | 1 | 1 | 2 | 1 | 1 | 2 | 2 | 1 | 0 | 0 | 1 | 16 |
| IN  | OR | 32059120 | CH       | AS    | 3 | 1 | 1 | 0 | 1 | 2 | 1 | 1 | 2 | 2 | 1 | 0 | 0 | 1 | 16 |
| PRO | OR | 32070444 | CM       | EL    | 4 | 1 | 1 | 1 | 1 | 2 | 1 | 1 | 0 | 2 | 1 | 0 | 0 | 1 | 16 |
| PED | OR | 32106185 | LAv      | AH    | 2 | 1 | 1 | 1 | 1 | 2 | 1 | 1 | 2 | 2 | 1 | 0 | 0 | 1 | 16 |
| PRO | OR | 32141218 | CM       | CC    | 2 | 1 | 1 | 1 | 1 | 2 | 1 | 1 | 0 | 2 | 1 | 2 | 0 | 1 | 16 |
| IN  | OR | 32148348 | CH       | GS    | 2 | 1 | 1 | 1 | 1 | 2 | 1 | 1 | 2 | 2 | 1 | 0 | 0 | 1 | 16 |
| IN  | OR | 32151218 | CH       | SK    | 2 | 1 | 1 | 1 | 1 | 2 | 1 | 1 | 2 | 0 | 1 | 2 | 0 | 1 | 16 |
| PRO | OR | 32154865 | CM       | SG    | 2 | 1 | 1 | 1 | 1 | 2 | 1 | 1 | 2 | 2 | 1 | 0 | 0 | 1 | 16 |
| IN  | OR | 32163038 | CH       | DCu   | 2 | 1 | 1 | 1 | 1 | 2 | 1 | 1 | 2 | 0 | 1 | 2 | 0 | 1 | 16 |
| PRO | OR | 32164225 | CM       | AFr   | 2 | 1 | 1 | 1 | 1 | 2 | 1 | 1 | 0 | 2 | 1 | 2 | 0 | 1 | 16 |
| EPH | OR | 32165678 | MPB/MABC | CP    | 2 | 1 | 1 | 1 | 1 | 2 | 1 | 0 | 2 | 2 | 1 | 0 | 2 | 0 | 16 |
| PRE | OR | 32168293 | DCr      | JPo   | 3 | 1 | 1 | 1 | 1 | 2 | 1 | 0 | 2 | 2 | 1 | 0 | 0 | 1 | 16 |
| PRO | OR | 32169609 | CM       | EL    | 2 | 1 | 1 | 1 | 1 | 2 | 1 | 1 | 0 | 2 | 1 | 2 | 0 | 1 | 16 |
| PED | OR | 32171233 | LAv      | AL    | 2 | 1 | 1 | 1 | 1 | 2 | 1 | 1 | 2 | 2 | 1 | 0 | 0 | 1 | 16 |
| PED | OR | 32173714 | LAv      | AL    | 2 | 1 | 1 | 1 | 1 | 2 | 1 | 1 | 2 | 2 | 1 | 0 | 0 | 1 | 16 |
| PRO | OR | 32187434 | CM       | TP    | 2 | 1 | 1 | 1 | 1 | 2 | 1 | 1 | 2 | 0 | 1 | 2 | 0 | 1 | 16 |
| PRE | OR | 32188024 | DCr      | MB    | 2 | 1 | 1 | 1 | 1 | 2 | 1 | 1 | 0 | 2 | 1 | 2 | 0 | 1 | 16 |
| PRO | OR | 32191709 | CM       | SZ    | 2 | 1 | 1 | 1 | 1 | 2 | 1 | 1 | 0 | 2 | 1 | 2 | 0 | 1 | 16 |
| PRE | OR | 32194165 | DCr      | LB    | 2 | 1 | 1 | 1 | 1 | 2 | 1 | 1 | 2 | 2 | 1 | 0 | 0 | 1 | 16 |
| IN  | OR | 32198299 | CH       | GS    | 2 | 1 | 1 | 1 | 1 | 2 | 1 | 1 | 2 | 2 | 1 | 0 | 0 | 1 | 16 |
| IN  | OR | 32209377 | CH       | AS    | 2 | 1 | 1 | 1 | 1 | 2 | 1 | 1 | 0 | 2 | 1 | 2 | 0 | 1 | 16 |
| EPH | OR | 32217133 | MPB/MABC | CP    | 2 | 1 | 1 | 1 | 1 | 2 | 1 | 1 | 2 | 2 | 1 | 0 | 0 | 1 | 16 |
| PED | OR | 32224828 | LAv      | ME/JH | 2 | 1 | 1 | 1 | 1 | 2 | 1 | 1 | 2 | 2 | 1 | 0 | 0 | 1 | 16 |
| PRE | OR | 32229137 | DCr      | BC    | 3 | 1 | 1 | 1 | 1 | 0 | 1 | 0 | 2 | 2 | 1 | 2 | 0 | 1 | 16 |
| PED | OR | 32232441 | LAv      | LA/JP | 2 | 1 | 1 | 1 | 1 | 2 | 1 | 1 | 2 | 2 | 1 | 0 | 0 | 1 | 16 |
| PRO | OR | 32246250 | CM       | SZ    | 2 | 1 | 1 | 1 | 1 | 2 | 1 | 1 | 0 | 2 | 1 | 0 | 2 | 1 | 16 |
| PRO | OR | 32252129 | CM       | JN    | 2 | 1 | 1 | 1 | 1 | 2 | 1 | 1 | 0 | 2 | 1 | 2 | 0 | 1 | 16 |
| PRO | OR | 32264988 | CM       | JN    | 2 | 1 | 1 | 1 | 1 | 2 | 1 | 1 | 2 | 2 | 1 | 0 | 0 | 1 | 16 |

|       |    |          |          |     |   |   |   |   |   |   |   |   |   |   |   |   |   |   |    |
|-------|----|----------|----------|-----|---|---|---|---|---|---|---|---|---|---|---|---|---|---|----|
| PRO   | OR | 32269116 | CM       | EL  | 2 | 1 | 1 | 1 | 1 | 2 | 1 | 1 | 2 | 2 | 1 | 0 | 0 | 1 | 16 |
| EPH   | OR | 32272235 | MPB/MABC | JA  | 1 | 1 | 1 | 1 | 1 | 0 | 0 | 1 | 2 | 2 | 1 | 2 | 2 | 1 | 16 |
| EPH   | OR | 32278017 | MPB/MABC | EM  | 2 | 1 | 1 | 1 | 1 | 2 | 1 | 1 | 2 | 2 | 1 | 0 | 0 | 1 | 16 |
| PRO   | OR | 32279017 | CM       | AFr | 2 | 1 | 1 | 1 | 1 | 2 | 1 | 1 | 0 | 2 | 1 | 2 | 0 | 1 | 16 |
| COVID | OR | 32283116 | YE       | SF  | 2 | 1 | 1 | 1 | 1 | 2 | 1 | 1 | 0 | 2 | 1 | 2 | 0 | 1 | 16 |
| COVID | OR | 32283117 | YE       | SF  | 2 | 1 | 1 | 1 | 1 | 2 | 1 | 1 | 0 | 2 | 1 | 2 | 0 | 1 | 16 |
| PED   | OR | 32283564 | LAv      | AL  | 2 | 1 | 1 | 1 | 1 | 2 | 1 | 1 | 2 | 2 | 1 | 0 | 0 | 1 | 16 |
| IN    | OR | 32284719 | CH       | NSh | 2 | 1 | 1 | 1 | 1 | 2 | 1 | 1 | 0 | 2 | 1 | 2 | 0 | 1 | 16 |
| EPH   | OR | 32290746 | MPB/MABC | YT  | 2 | 1 | 1 | 1 | 1 | 2 | 1 | 1 | 0 | 2 | 1 | 0 | 2 | 1 | 16 |
| PRE   | OR | 32299340 | DCr      | DCr | 2 | 1 | 1 | 1 | 1 | 2 | 1 | 1 | 2 | 2 | 1 | 0 | 0 | 1 | 16 |
| PED   | OR | 32301844 | LAv      | SL  | 2 | 1 | 1 | 1 | 1 | 2 | 1 | 1 | 2 | 2 | 1 | 0 | 0 | 1 | 16 |
| EPH   | OR | 32301991 | MPB/MABC | JA  | 2 | 1 | 1 | 1 | 1 | 2 | 1 | 1 | 0 | 2 | 1 | 2 | 0 | 1 | 16 |
| PED   | OR | 32304416 | LAv      | DO  | 2 | 1 | 1 | 1 | 1 | 2 | 1 | 1 | 0 | 2 | 1 | 2 | 0 | 1 | 16 |
| IN    | OR | 32304804 | CH       | LAI | 2 | 1 | 1 | 1 | 1 | 2 | 1 | 1 | 2 | 2 | 1 | 0 | 0 | 1 | 16 |
| PRE   | OR | 32307352 | DCr      | BC  | 2 | 1 | 1 | 1 | 1 | 2 | 1 | 1 | 2 | 2 | 1 | 0 | 0 | 1 | 16 |
| PRE   | OR | 32336582 | DCr      | LB  | 2 | 1 | 1 | 1 | 1 | 2 | 1 | 1 | 0 | 2 | 1 | 2 | 0 | 1 | 16 |
| PED   | OR | 32343108 | LAv      | AL  | 2 | 1 | 1 | 1 | 1 | 2 | 1 | 1 | 2 | 2 | 1 | 0 | 0 | 1 | 16 |
| PRO   | OR | 32343353 | CM       | SZ  | 2 | 1 | 1 | 1 | 1 | 2 | 1 | 1 | 2 | 2 | 1 | 0 | 0 | 1 | 16 |
| EPH   | OR | 32345027 | MPB/MABC | YT  | 2 | 1 | 1 | 1 | 1 | 2 | 1 | 1 | 0 | 2 | 1 | 0 | 2 | 1 | 16 |
| IN    | OR | 32347147 | CH       | LAI | 2 | 1 | 1 | 1 | 1 | 2 | 1 | 1 | 2 | 2 | 1 | 0 | 0 | 1 | 16 |
| PRE   | OR | 32387124 | DCr      | MB  | 2 | 1 | 1 | 1 | 1 | 2 | 1 | 1 | 0 | 2 | 1 | 2 | 0 | 1 | 16 |
| EPH   | OR | 32413089 | MPB/MABC | EM  | 2 | 1 | 1 | 1 | 1 | 2 | 1 | 1 | 0 | 2 | 1 | 0 | 2 | 1 | 16 |
| IN    | OR | 32417498 | CH       | NSh | 2 | 1 | 1 | 1 | 1 | 2 | 1 | 1 | 0 | 2 | 1 | 2 | 0 | 1 | 16 |
| PRO   | OR | 32426140 | CM       | SZ  | 2 | 1 | 1 | 1 | 1 | 2 | 1 | 1 | 0 | 2 | 1 | 2 | 0 | 1 | 16 |
| EPH   | OR | 32430288 | MPB/MABC | EM  | 2 | 1 | 1 | 1 | 1 | 2 | 1 | 1 | 0 | 2 | 1 | 2 | 0 | 1 | 16 |
| PRE   | OR | 32438582 | DCr      | RC  | 2 | 1 | 1 | 1 | 1 | 2 | 1 | 1 | 2 | 2 | 1 | 0 | 0 | 1 | 16 |
| PED   | OR | 32452974 | LAv      | AL  | 2 | 1 | 1 | 1 | 1 | 2 | 1 | 1 | 2 | 2 | 1 | 0 | 0 | 1 | 16 |
| IN    | OR | 32456591 | CH       | MM  | 2 | 1 | 1 | 1 | 1 | 2 | 1 | 1 | 2 | 2 | 1 | 0 | 0 | 1 | 16 |
| PRE   | OR | 32460097 | DCr      | LB  | 2 | 1 | 1 | 1 | 0 | 2 | 1 | 0 | 2 | 2 | 1 | 2 | 0 | 1 | 16 |
| PRE   | OR | 32492455 | DCr      | DCr | 2 | 1 | 1 | 1 | 1 | 2 | 1 | 1 | 2 | 2 | 1 | 0 | 0 | 1 | 16 |
| COVID | OR | 32494921 | YE       | SF  | 2 | 1 | 1 | 1 | 1 | 2 | 1 | 1 | 0 | 2 | 1 | 2 | 0 | 1 | 16 |
| PRE   | OR | 32497484 | DCr      | MB  | 1 | 0 | 1 | 1 | 1 | 2 | 1 | 1 | 0 | 2 | 1 | 2 | 2 | 1 | 16 |
| PRO   | OR | 32500276 | CM       | JN  | 2 | 1 | 1 | 1 | 1 | 2 | 1 | 1 | 2 | 2 | 1 | 0 | 0 | 1 | 16 |
| EPH   | OR | 32502577 | MPB/MABC | EM  | 2 | 1 | 1 | 1 | 1 | 2 | 1 | 1 | 0 | 2 | 1 | 2 | 0 | 1 | 16 |
| PRO   | OR | 32504766 | CM       | SG  | 2 | 1 | 1 | 1 | 1 | 2 | 1 | 1 | 2 | 2 | 1 | 0 | 0 | 1 | 16 |
| PRE   | OR | 32504771 | DCr      | JPo | 2 | 1 | 1 | 1 | 1 | 2 | 1 | 1 | 0 | 2 | 1 | 2 | 0 | 1 | 16 |
| PRE   | OR | 32522698 | DCr      | RC  | 2 | 1 | 1 | 1 | 1 | 2 | 1 | 1 | 0 | 2 | 1 | 2 | 0 | 1 | 16 |
| PRE   | OR | 32527221 | DCr      | RC  | 2 | 1 | 1 | 1 | 1 | 2 | 1 | 1 | 0 | 2 | 1 | 2 | 0 | 1 | 16 |
| EPH   | OR | 32532201 | MPB/MABC | SB  | 2 | 1 | 1 | 1 | 1 | 2 | 1 | 1 | 0 | 2 | 1 | 2 | 0 | 1 | 16 |
| PRO   | OR | 32544415 | CM       | CC  | 1 | 1 | 1 | 1 | 1 | 2 | 0 | 1 | 0 | 2 | 1 | 2 | 2 | 1 | 16 |
| PED   | OR | 32558446 | LAv      | DO  | 1 | 1 | 1 | 1 | 1 | 2 | 1 | 0 | 2 | 2 | 1 | 2 | 0 | 1 | 16 |
| IN    | OR | 32565168 | CH       | AS  | 2 | 1 | 1 | 1 | 1 | 2 | 1 | 1 | 2 | 0 | 1 | 2 | 0 | 1 | 16 |
| PRE   | OR | 32566238 | DCr      | RC  | 2 | 1 | 1 | 1 | 1 | 2 | 1 | 1 | 0 | 2 | 1 | 2 | 0 | 1 | 16 |
| PRE   | OR | 32572100 | DCr      | AFe | 4 | 1 | 1 | 1 | 1 | 2 | 1 | 1 | 0 | 2 | 1 | 0 | 0 | 1 | 16 |

|       |    |          |          |     |   |   |   |   |   |   |   |   |   |   |   |   |   |   |    |
|-------|----|----------|----------|-----|---|---|---|---|---|---|---|---|---|---|---|---|---|---|----|
| PRO   | OR | 32575355 | CM       | JN  | 2 | 1 | 1 | 1 | 1 | 2 | 1 | 1 | 2 | 2 | 1 | 0 | 0 | 1 | 16 |
| PED   | OR | 32576791 | LA       | NSa | 2 | 1 | 1 | 1 | 1 | 2 | 1 | 1 | 2 | 2 | 1 | 0 | 0 | 1 | 16 |
| EPH   | OR | 32580006 | MPB/MABC | GK  | 2 | 1 | 1 | 1 | 1 | 2 | 1 | 1 | 2 | 2 | 1 | 0 | 0 | 1 | 16 |
| IN    | OR | 32580007 | CH       | SK  | 2 | 1 | 1 | 1 | 1 | 2 | 1 | 1 | 2 | 2 | 1 | 0 | 0 | 1 | 16 |
| PRO   | OR | 32583193 | CM       | TP  | 2 | 1 | 1 | 1 | 1 | 2 | 1 | 1 | 0 | 2 | 1 | 2 | 0 | 1 | 16 |
| PRO   | OR | 32608580 | CM       | AFr | 2 | 1 | 1 | 1 | 1 | 0 | 1 | 1 | 2 | 2 | 1 | 2 | 0 | 1 | 16 |
| PRO   | OR | 32634049 | CM       | SC  | 2 | 1 | 1 | 1 | 1 | 2 | 1 | 1 | 0 | 2 | 1 | 2 | 0 | 1 | 16 |
| PRO   | OR | 32648925 | CM       | CC  | 2 | 1 | 1 | 1 | 1 | 2 | 1 | 1 | 0 | 2 | 1 | 2 | 0 | 1 | 16 |
| PRO   | OR | 32670638 | CM       | PP  | 2 | 1 | 1 | 1 | 1 | 2 | 1 | 1 | 0 | 2 | 1 | 2 | 0 | 1 | 16 |
| EPH   | OR | 32692712 | MPB/MABC | YT  | 2 | 1 | 1 | 1 | 1 | 2 | 1 | 1 | 0 | 2 | 1 | 0 | 2 | 1 | 16 |
| PRE   | OR | 32733171 | DCr      | DCr | 2 | 1 | 1 | 1 | 1 | 2 | 1 | 1 | 0 | 2 | 1 | 2 | 0 | 1 | 16 |
| PRE   | OR | 32739845 | DCr      | BC  | 2 | 1 | 1 | 1 | 1 | 2 | 1 | 1 | 2 | 2 | 1 | 0 | 0 | 1 | 16 |
| EPH   | OR | 32747131 | MPB/MABC | YT  | 2 | 1 | 1 | 1 | 1 | 2 | 1 | 1 | 0 | 2 | 1 | 0 | 2 | 1 | 16 |
| PED   | OR | 32766493 | LA       | AH  | 2 | 1 | 1 | 1 | 1 | 2 | 1 | 1 | 2 | 2 | 1 | 0 | 0 | 1 | 16 |
| IN    | OR | 32769815 | CH       | AS  | 2 | 1 | 1 | 1 | 1 | 2 | 0 | 0 | 2 | 2 | 1 | 2 | 0 | 1 | 16 |
| IN    | OR | 32769819 | CH       | SK  | 2 | 1 | 1 | 1 | 1 | 2 | 1 | 1 | 2 | 2 | 1 | 0 | 0 | 1 | 16 |
| PRO   | OR | 32772765 | CM       | TK  | 2 | 1 | 1 | 1 | 1 | 2 | 1 | 1 | 0 | 2 | 1 | 2 | 0 | 1 | 16 |
| PRO   | OR | 32778971 | CM       | JN  | 2 | 1 | 1 | 1 | 1 | 2 | 1 | 1 | 0 | 2 | 1 | 2 | 0 | 1 | 16 |
| PRO   | OR | 32802436 | CM       | EL  | 2 | 1 | 1 | 1 | 1 | 2 | 1 | 1 | 0 | 2 | 1 | 2 | 0 | 1 | 16 |
| PRE   | OR | 32833853 | DCr      | LB  | 2 | 1 | 1 | 1 | 1 | 2 | 1 | 1 | 0 | 2 | 1 | 2 | 0 | 1 | 16 |
| PRO   | OR | 32838754 | CM       | TR  | 2 | 1 | 1 | 1 | 1 | 2 | 1 | 1 | 0 | 2 | 1 | 2 | 0 | 1 | 16 |
| PRE   | OR | 32847734 | DCr      | DCr | 2 | 1 | 1 | 1 | 1 | 2 | 1 | 1 | 2 | 2 | 1 | 0 | 0 | 1 | 16 |
| PRO   | OR | 32864644 | CM       | EL  | 2 | 1 | 1 | 1 | 1 | 2 | 1 | 1 | 0 | 2 | 1 | 2 | 0 | 1 | 16 |
| PRO   | OR | 32918986 | CM       | TR  | 2 | 1 | 1 | 1 | 1 | 2 | 1 | 1 | 0 | 2 | 1 | 2 | 0 | 1 | 16 |
| EPH   | OR | 32925479 | MPB/MABC | SB  | 2 | 1 | 1 | 1 | 1 | 2 | 1 | 1 | 2 | 2 | 1 | 0 | 0 | 1 | 16 |
| IN    | OR | 32948171 | CH       | DCu | 2 | 1 | 1 | 1 | 1 | 2 | 1 | 1 | 0 | 2 | 1 | 2 | 0 | 1 | 16 |
| EPH   | OR | 32961310 | MPB/MABC | CP  | 2 | 1 | 1 | 1 | 1 | 2 | 1 | 1 | 2 | 2 | 1 | 0 | 0 | 1 | 16 |
| PRO   | OR | 32968178 | CM       | SZ  | 2 | 1 | 1 | 1 | 1 | 2 | 1 | 1 | 2 | 2 | 1 | 0 | 0 | 1 | 16 |
| PRO   | OR | 32976962 | CM       | JN  | 2 | 1 | 1 | 1 | 1 | 2 | 1 | 1 | 0 | 2 | 1 | 2 | 0 | 1 | 16 |
| PRE   | OR | 32979404 | DCr      | MB  | 1 | 0 | 1 | 1 | 1 | 2 | 1 | 1 | 2 | 2 | 1 | 2 | 0 | 1 | 16 |
| PRO   | OR | 32985950 | CM       | PP  | 4 | 1 | 1 | 1 | 1 | 2 | 1 | 1 | 0 | 2 | 1 | 0 | 0 | 1 | 16 |
| PRO   | OR | 32986490 | CM       | TK  | 2 | 1 | 1 | 1 | 1 | 2 | 1 | 1 | 0 | 2 | 1 | 2 | 0 | 1 | 16 |
| IN    | OR | 32986781 | CH       | AS  | 2 | 1 | 1 | 1 | 1 | 2 | 1 | 0 | 2 | 2 | 1 | 2 | 0 | 0 | 16 |
| PRE   | OR | 32997721 | DCr      | LB  | 2 | 1 | 1 | 1 | 1 | 2 | 1 | 1 | 2 | 2 | 1 | 0 | 0 | 1 | 16 |
| COVID | OR | 32998872 | YE       | MA  | 1 | 1 | 1 | 1 | 1 | 0 | 1 | 0 | 2 | 2 | 1 | 2 | 2 | 1 | 16 |
| EPH   | OR | 32998954 | MPB/MABC | JA  | 2 | 1 | 1 | 1 | 1 | 2 | 1 | 1 | 0 | 2 | 1 | 0 | 2 | 1 | 16 |
| IN    | OR | 33021889 | CH       | DB  | 2 | 0 | 1 | 1 | 1 | 2 | 0 | 1 | 2 | 2 | 1 | 2 | 0 | 1 | 16 |
| COVID | OR | 33023348 | YE       | JW  | 2 | 1 | 1 | 1 | 1 | 2 | 1 | 1 | 0 | 2 | 1 | 2 | 0 | 1 | 16 |
| PED   | OR | 33027241 | LA       | AH  | 2 | 1 | 1 | 1 | 1 | 2 | 1 | 1 | 2 | 2 | 1 | 0 | 0 | 1 | 16 |
| IN    | OR | 33028139 | CH       | MM  | 1 | 1 | 1 | 1 | 1 | 0 | 0 | 1 | 2 | 2 | 1 | 2 | 2 | 1 | 16 |
| EPH   | OR | 33039589 | MPB/MABC | SB  | 2 | 1 | 1 | 1 | 1 | 2 | 1 | 1 | 2 | 2 | 1 | 0 | 0 | 1 | 16 |
| PRE   | OR | 33045006 | DCr      | DCr | 2 | 1 | 1 | 1 | 1 | 2 | 1 | 1 | 2 | 2 | 1 | 0 | 0 | 1 | 16 |
| PRE   | OR | 33054829 | DCr      | JPo | 2 | 1 | 1 | 1 | 1 | 2 | 1 | 1 | 0 | 2 | 1 | 2 | 0 | 1 | 16 |
| PRE   | OR | 33060410 | DCr      | RC  | 2 | 1 | 1 | 1 | 1 | 2 | 1 | 1 | 0 | 2 | 1 | 2 | 0 | 1 | 16 |

|       |    |          |          |       |   |   |   |   |   |   |   |   |   |   |   |   |   |   |    |
|-------|----|----------|----------|-------|---|---|---|---|---|---|---|---|---|---|---|---|---|---|----|
| PRO   | OR | 33067528 | CM       | JN    | 2 | 1 | 1 | 1 | 1 | 2 | 1 | 1 | 0 | 2 | 1 | 2 | 0 | 1 | 16 |
| COVID | OR | 33074594 | YE       | SF    | 2 | 1 | 1 | 1 | 1 | 2 | 1 | 1 | 0 | 2 | 1 | 2 | 0 | 1 | 16 |
| PRO   | OR | 33082979 | CM       | PP    | 2 | 1 | 1 | 1 | 1 | 2 | 1 | 1 | 0 | 2 | 1 | 2 | 0 | 1 | 16 |
| COVID | OR | 33093278 | YE       | MD    | 2 | 1 | 1 | 1 | 1 | 2 | 1 | 1 | 0 | 2 | 1 | 2 | 0 | 1 | 16 |
| PRE   | OR | 33133695 | DCr      | MB    | 4 | 1 | 1 | 1 | 0 | 2 | 0 | 1 | 0 | 2 | 1 | 2 | 0 | 1 | 16 |
| IN    | OR | 33134932 | CH       | SK    | 1 | 1 | 1 | 1 | 0 | 2 | 1 | 1 | 2 | 2 | 1 | 2 | 0 | 1 | 16 |
| PED   | OR | 33147522 | LAv      | NA    | 2 | 1 | 1 | 1 | 1 | 2 | 1 | 1 | 2 | 2 | 1 | 0 | 0 | 1 | 16 |
| COVID | OR | 33188678 | YE       | FA    | 2 | 1 | 1 | 1 | 1 | 2 | 1 | 1 | 2 | 2 | 1 | 0 | 0 | 1 | 16 |
| IN    | OR | 33201736 | CH       | JR    | 1 | 1 | 1 | 1 | 1 | 2 | 1 | 1 | 2 | 2 | 1 | 2 | 0 | 0 | 16 |
| PRE   | OR | 33211698 | DCr      | RC    | 2 | 1 | 1 | 1 | 1 | 2 | 1 | 1 | 0 | 2 | 1 | 2 | 0 | 1 | 16 |
| PRE   | OR | 33221365 | DCr      | JPo   | 2 | 1 | 1 | 1 | 1 | 2 | 1 | 1 | 0 | 2 | 1 | 0 | 2 | 1 | 16 |
| PRO   | OR | 33231635 | CM       | EL    | 2 | 1 | 1 | 1 | 1 | 2 | 1 | 1 | 0 | 2 | 1 | 2 | 0 | 1 | 16 |
| EPH   | OR | 33237971 | MPB/MABC | YT    | 2 | 1 | 1 | 1 | 1 | 2 | 1 | 1 | 0 | 2 | 1 | 0 | 2 | 1 | 16 |
| IN    | OR | 33241716 | CH       | JR    | 2 | 1 | 1 | 1 | 1 | 2 | 1 | 1 | 2 | 2 | 1 | 0 | 0 | 1 | 16 |
| PRO   | OR | 33247898 | CM       | TR    | 2 | 1 | 1 | 1 | 1 | 2 | 1 | 1 | 0 | 2 | 1 | 2 | 0 | 1 | 16 |
| IN    | OR | 33248155 | CH       | DCu   | 2 | 1 | 1 | 1 | 1 | 2 | 1 | 1 | 2 | 2 | 1 | 0 | 0 | 1 | 16 |
| IN    | OR | 33253736 | CH       | LAI   | 2 | 1 | 1 | 1 | 1 | 2 | 1 | 1 | 0 | 0 | 1 | 2 | 2 | 1 | 16 |
| PED   | OR | 33282317 | LAv      | LA/JP | 2 | 1 | 1 | 1 | 1 | 2 | 1 | 1 | 2 | 2 | 1 | 0 | 0 | 1 | 16 |
| IN    | OR | 33285379 | CH       | NSh   | 2 | 1 | 1 | 1 | 1 | 0 | 1 | 1 | 2 | 2 | 1 | 2 | 0 | 1 | 16 |
| EPH   | OR | 33289793 | MPB/MABC | EM    | 2 | 1 | 1 | 1 | 1 | 2 | 1 | 1 | 2 | 2 | 1 | 0 | 0 | 1 | 16 |
| PRE   | OR | 33292296 | DCr      | DCr   | 2 | 1 | 1 | 1 | 1 | 2 | 1 | 1 | 0 | 2 | 1 | 2 | 0 | 1 | 16 |
| EPH   | OR | 33310659 | MPB/MABC | YT    | 2 | 1 | 1 | 1 | 1 | 2 | 1 | 1 | 0 | 2 | 1 | 0 | 2 | 1 | 16 |
| PRE   | OR | 33313710 | DCr      | AFe   | 2 | 1 | 1 | 1 | 1 | 2 | 1 | 1 | 0 | 2 | 1 | 0 | 2 | 1 | 16 |
| EPH   | OR | 33317326 | MPB/MABC | SB    | 3 | 1 | 1 | 1 | 1 | 2 | 1 | 1 | 2 | 2 | 1 | 0 | 0 | 0 | 16 |
| COVID | OR | 33317467 | YE       | FA    | 2 | 1 | 1 | 1 | 1 | 2 | 1 | 1 | 0 | 2 | 1 | 2 | 0 | 1 | 16 |
| PRO   | OR | 33335205 | CM       | TR    | 2 | 1 | 1 | 1 | 1 | 2 | 1 | 1 | 0 | 2 | 1 | 2 | 0 | 1 | 16 |
| EPH   | OR | 33337538 | MPB/MABC | EM    | 2 | 1 | 1 | 1 | 1 | 2 | 1 | 1 | 0 | 2 | 1 | 0 | 2 | 1 | 16 |
| IN    | OR | 33340642 | CH       | JR    | 2 | 1 | 1 | 1 | 1 | 2 | 1 | 1 | 2 | 2 | 1 | 0 | 0 | 1 | 16 |
| PRE   | OR | 33380857 | DCr      | LB    | 2 | 1 | 1 | 1 | 1 | 2 | 1 | 1 | 0 | 2 | 1 | 2 | 0 | 1 | 16 |
| PRO   | OR | 33385471 | CM       | JN    | 2 | 1 | 1 | 1 | 1 | 2 | 1 | 1 | 0 | 2 | 1 | 2 | 0 | 1 | 16 |
| PRE   | OR | 33388365 | DCr      | CE    | 2 | 1 | 1 | 1 | 1 | 2 | 1 | 1 | 2 | 2 | 1 | 0 | 0 | 1 | 16 |
| PRO   | OR | 33388366 | CM       | EL    | 2 | 1 | 1 | 1 | 1 | 2 | 1 | 1 | 0 | 2 | 1 | 2 | 0 | 1 | 16 |
| PRO   | OR | 33437558 | CM       | JN    | 2 | 1 | 1 | 1 | 1 | 2 | 1 | 1 | 0 | 2 | 1 | 2 | 0 | 1 | 16 |
| COVID | OR | 33263244 | YE       | SC    | 2 | 1 | 1 | 1 | 1 | 2 | 1 | 1 | 0 | 2 | 1 | 2 | 0 | 1 | 16 |
| COVID | OR | 33049385 | YE       | SC    | 2 | 1 | 1 | 1 | 1 | 2 | 1 | 1 | 2 | 2 | 1 | 0 | 0 | 1 | 16 |
| EPH   | OR | 32860854 | MPB/MABC | SC    | 2 | 1 | 1 | 1 | 1 | 2 | 1 | 1 | 2 | 2 | 1 | 0 | 0 | 1 | 16 |
| EPH   | OR | 33086085 | MPB/MABC | SC    | 2 | 1 | 1 | 1 | 1 | 2 | 1 | 1 | 2 | 2 | 1 | 0 | 0 | 1 | 16 |
| EPH   | OR | 32710916 | MPB/MABC | SC    | 2 | 1 | 1 | 1 | 1 | 2 | 1 | 1 | 2 | 2 | 1 | 0 | 0 | 1 | 16 |
| EPH   | OR | 32673732 | MPB/MABC | SC    | 2 | 1 | 1 | 1 | 1 | 2 | 1 | 1 | 2 | 2 | 1 | 0 | 0 | 1 | 16 |
| IN    | OR | 32371666 | CH       | SC    | 2 | 1 | 1 | 1 | 1 | 2 | 1 | 1 | 0 | 2 | 1 | 2 | 0 | 1 | 16 |
| IN    | OR | 32629093 | CH       | SC    | 2 | 1 | 1 | 1 | 1 | 2 | 1 | 1 | 0 | 2 | 1 | 2 | 0 | 1 | 16 |
| IN    | OR | 32853724 | CH       | SC    | 2 | 1 | 1 | 1 | 1 | 2 | 1 | 1 | 0 | 2 | 1 | 2 | 0 | 1 | 16 |
| PED   | OR | 32795596 | LAv      | SC    | 2 | 1 | 1 | 1 | 1 | 2 | 1 | 1 | 0 | 2 | 1 | 2 | 0 | 1 | 16 |
| PED   | OR | 32740187 | LAv      | SC    | 2 | 1 | 1 | 1 | 1 | 2 | 1 | 1 | 0 | 2 | 1 | 2 | 0 | 1 | 16 |

|     |    |          |          |       |   |   |   |   |   |   |   |   |   |   |   |   |   |   |    |
|-----|----|----------|----------|-------|---|---|---|---|---|---|---|---|---|---|---|---|---|---|----|
| PRE | OR | 32841678 | DCr      | SC    | 2 | 1 | 1 | 1 | 1 | 2 | 1 | 1 | 2 | 2 | 1 | 0 | 0 | 1 | 16 |
| PRE | OR | 32673735 | DCr      | SC    | 2 | 1 | 1 | 1 | 1 | 2 | 1 | 1 | 0 | 2 | 1 | 2 | 0 | 1 | 16 |
| PRE | OR | 32918983 | DCr      | SC    | 2 | 1 | 1 | 1 | 1 | 2 | 1 | 1 | 2 | 2 | 1 | 0 | 0 | 1 | 16 |
| PRE | OR | 32682641 | DCr      | SC    | 2 | 1 | 1 | 1 | 1 | 2 | 1 | 1 | 0 | 2 | 1 | 2 | 0 | 1 | 16 |
| PRO | OR | 32731260 | CM       | SC    | 2 | 1 | 1 | 1 | 1 | 2 | 1 | 1 | 0 | 2 | 1 | 2 | 0 | 1 | 16 |
| PRO | OR | 32684378 | CM       | SC    | 2 | 1 | 1 | 1 | 1 | 2 | 1 | 1 | 0 | 2 | 1 | 0 | 2 | 1 | 16 |
| PRO | OR | 32853726 | CM       | SC    | 2 | 1 | 1 | 1 | 1 | 2 | 1 | 1 | 2 | 2 | 1 | 0 | 0 | 1 | 16 |
| PRO | OR | 32828820 | CM       | SC    | 2 | 1 | 1 | 1 | 1 | 2 | 1 | 1 | 2 | 2 | 1 | 0 | 0 | 1 | 16 |
| PRO | OR | 32710915 | CM       | SC    | 2 | 1 | 1 | 1 | 1 | 2 | 1 | 1 | 0 | 2 | 1 | 2 | 0 | 1 | 16 |
| PRO | OR | 32858156 | CM       | SC    | 2 | 1 | 1 | 1 | 1 | 2 | 1 | 1 | 2 | 2 | 1 | 0 | 0 | 1 | 16 |
| PRO | OR | 32931850 | CM       | SC    | 2 | 1 | 1 | 1 | 1 | 2 | 1 | 1 | 0 | 2 | 1 | 2 | 0 | 1 | 16 |
| IN  | OR | 30213223 | CH       | DB    | 2 | 1 | 0 | 1 | 0 | 2 | 0 | 1 | 2 | 2 | 1 | 2 | 0 | 1 | 15 |
| PRO | OR | 30857978 | CM       | CC    | 2 | 1 | 1 | 1 | 1 | 2 | 0 | 1 | 0 | 2 | 1 | 2 | 0 | 1 | 15 |
| PRO | OR | 31187435 | CM       | TK    | 2 | 1 | 1 | 1 | 1 | 2 | 0 | 1 | 2 | 2 | 1 | 0 | 0 | 1 | 15 |
| EPH | OR | 31422358 | MPB/MABC | EM    | 2 | 1 | 1 | 1 | 1 | 2 | 1 | 0 | 0 | 2 | 1 | 2 | 0 | 1 | 15 |
| EPH | OR | 31558356 | MPB/MABC | EM    | 3 | 1 | 1 | 1 | 1 | 2 | 1 | 1 | 0 | 2 | 1 | 0 | 0 | 1 | 15 |
| EPH | OR | 31613657 | MPB/MABC | SB    | 2 | 1 | 1 | 1 | 1 | 2 | 1 | 1 | 2 | 0 | 1 | 2 | 0 | 0 | 15 |
| PRO | OR | 31613696 | CM       | AFr   | 2 | 1 | 1 | 1 | 1 | 2 | 1 | 1 | 0 | 2 | 1 | 2 | 0 | 0 | 15 |
| EPH | OR | 31829067 | MPB/MABC | JA    | 1 | 1 | 1 | 1 | 1 | 2 | 1 | 1 | 0 | 2 | 1 | 0 | 2 | 1 | 15 |
| PRE | OR | 31924467 | DCr      | JPo   | 2 | 1 | 1 | 1 | 1 | 2 | 1 | 0 | 0 | 2 | 1 | 2 | 0 | 1 | 15 |
| IN  | OR | 31962179 | CH       | DCu   | 2 | 1 | 1 | 1 | 1 | 2 | 0 | 1 | 2 | 2 | 1 | 0 | 0 | 1 | 15 |
| PRE | OR | 31974211 | DCr      | JPo   | 2 | 1 | 1 | 1 | 1 | 2 | 1 | 0 | 2 | 2 | 1 | 0 | 0 | 1 | 15 |
| PRO | OR | 31982504 | CM       | TP    | 2 | 1 | 1 | 1 | 1 | 2 | 0 | 1 | 0 | 2 | 1 | 0 | 2 | 1 | 15 |
| PRO | OR | 31982505 | CM       | AFr   | 2 | 1 | 0 | 1 | 1 | 2 | 1 | 1 | 2 | 2 | 1 | 0 | 0 | 1 | 15 |
| PRE | OR | 32002593 | DCr      | RC    | 2 | 1 | 1 | 1 | 1 | 0 | 0 | 1 | 2 | 2 | 1 | 2 | 0 | 1 | 15 |
| PRO | OR | 32018074 | CM       | PP    | 3 | 1 | 1 | 1 | 1 | 2 | 1 | 1 | 0 | 2 | 1 | 0 | 0 | 1 | 15 |
| PRE | OR | 32045662 | DCr      | AFe   | 1 | 1 | 1 | 1 | 1 | 2 | 1 | 1 | 2 | 2 | 1 | 0 | 0 | 1 | 15 |
| IN  | OR | 32052366 | CH       | SK    | 1 | 1 | 1 | 1 | 1 | 2 | 1 | 1 | 2 | 2 | 1 | 0 | 0 | 1 | 15 |
| PED | OR | 32057946 | LAv      | ME/JH | 2 | 1 | 1 | 0 | 1 | 2 | 1 | 1 | 2 | 2 | 1 | 0 | 0 | 1 | 15 |
| PRO | OR | 32057947 | CM       | SG    | 2 | 1 | 1 | 0 | 1 | 2 | 1 | 1 | 2 | 2 | 1 | 0 | 0 | 1 | 15 |
| PRE | OR | 32091295 | DCr      | JPo   | 1 | 1 | 1 | 1 | 1 | 2 | 1 | 1 | 0 | 2 | 1 | 2 | 0 | 1 | 15 |
| IN  | OR | 32114072 | CH       | DB    | 2 | 0 | 1 | 1 | 1 | 2 | 1 | 1 | 2 | 2 | 1 | 0 | 0 | 1 | 15 |
| PRE | OR | 32130193 | DCr      | MB    | 3 | 1 | 1 | 0 | 1 | 2 | 0 | 1 | 2 | 2 | 1 | 0 | 0 | 1 | 15 |
| PRE | OR | 32131894 | DCr      | RC    | 3 | 1 | 1 | 1 | 1 | 2 | 1 | 1 | 0 | 2 | 1 | 0 | 0 | 1 | 15 |
| IN  | OR | 32133760 | CH       | AS    | 2 | 1 | 1 | 1 | 1 | 2 | 1 | 0 | 2 | 2 | 0 | 2 | 0 | 0 | 15 |
| IN  | OR | 32152653 | CH       | AS    | 2 | 1 | 1 | 1 | 1 | 2 | 1 | 0 | 2 | 2 | 1 | 0 | 0 | 1 | 15 |
| IN  | OR | 32169605 | CH       | GS    | 2 | 1 | 1 | 1 | 1 | 2 | 0 | 1 | 2 | 2 | 1 | 0 | 0 | 1 | 15 |
| PRO | OR | 32169607 | CM       | PP    | 3 | 1 | 1 | 1 | 1 | 2 | 1 | 1 | 2 | 0 | 1 | 0 | 0 | 1 | 15 |
| PRO | OR | 32173702 | CM       | AFr   | 2 | 1 | 1 | 1 | 1 | 2 | 1 | 1 | 0 | 2 | 1 | 2 | 0 | 0 | 15 |
| PRE | OR | 32178958 | DCr      | MB    | 2 | 1 | 1 | 1 | 1 | 0 | 1 | 0 | 0 | 2 | 1 | 2 | 2 | 1 | 15 |
| IN  | OR | 32186517 | CH       | AS    | 2 | 1 | 1 | 1 | 1 | 2 | 1 | 1 | 2 | 2 | 0 | 0 | 0 | 1 | 15 |
| PRO | OR | 32194164 | CM       | AFr   | 3 | 1 | 1 | 1 | 1 | 2 | 1 | 1 | 0 | 2 | 1 | 0 | 0 | 1 | 15 |
| IN  | OR | 32200716 | CH       | NSh   | 2 | 1 | 1 | 1 | 1 | 2 | 1 | 0 | 2 | 2 | 1 | 0 | 0 | 1 | 15 |
| IN  | OR | 32228640 | CH       | DB    | 2 | 0 | 1 | 1 | 1 | 2 | 1 | 1 | 0 | 2 | 1 | 2 | 0 | 1 | 15 |

|       |    |          |          |       |   |   |   |   |   |   |   |   |   |   |   |   |   |   |    |
|-------|----|----------|----------|-------|---|---|---|---|---|---|---|---|---|---|---|---|---|---|----|
| PRE   | OR | 32252130 | DCr      | DCr   | 2 | 1 | 1 | 1 | 1 | 2 | 1 | 1 | 2 | 2 | 1 | 0 | 0 | 0 | 15 |
| PRO   | OR | 32272234 | CM       | SZ    | 2 | 1 | 1 | 1 | 0 | 2 | 1 | 1 | 0 | 2 | 1 | 0 | 2 | 1 | 15 |
| PRO   | OR | 32282707 | CM       | TK    | 2 | 1 | 1 | 1 | 1 | 2 | 1 | 1 | 2 | 2 | 1 | 0 | 0 | 0 | 15 |
| PRE   | OR | 32286900 | DCr      | CE    | 1 | 1 | 1 | 1 | 1 | 2 | 1 | 1 | 2 | 2 | 1 | 0 | 0 | 1 | 15 |
| PRO   | OR | 32293300 | CM       | TK    | 2 | 1 | 1 | 1 | 0 | 2 | 1 | 1 | 0 | 2 | 1 | 2 | 0 | 1 | 15 |
| PRE   | OR | 32301640 | DCr      | JPo   | 3 | 1 | 1 | 1 | 1 | 2 | 1 | 1 | 0 | 2 | 1 | 0 | 0 | 1 | 15 |
| PRE   | OR | 32306856 | DCr      | LB    | 2 | 1 | 1 | 1 | 0 | 2 | 1 | 1 | 2 | 2 | 1 | 0 | 0 | 1 | 15 |
| EPH   | OR | 32346603 | MPB/MABC | CP    | 2 | 1 | 1 | 1 | 1 | 2 | 1 | 1 | 0 | 2 | 1 | 0 | 2 | 0 | 15 |
| PED   | OR | 32348794 | LAv      | ME/JH | 1 | 1 | 1 | 1 | 1 | 2 | 1 | 1 | 2 | 2 | 1 | 0 | 0 | 1 | 15 |
| EPH   | OR | 32371406 | MPB/MABC | EM    | 1 | 1 | 1 | 1 | 1 | 2 | 1 | 1 | 0 | 2 | 1 | 0 | 2 | 1 | 15 |
| EPH   | OR | 32376347 | MPB/MABC | JA    | 3 | 1 | 1 | 1 | 1 | 2 | 1 | 1 | 0 | 2 | 1 | 0 | 0 | 1 | 15 |
| PRE   | OR | 32399316 | DCr      | RC    | 2 | 1 | 1 | 1 | 1 | 2 | 1 | 0 | 2 | 2 | 1 | 0 | 0 | 1 | 15 |
| PRO   | OR | 32419397 | CM       | CC    | 2 | 1 | 1 | 1 | 1 | 2 | 1 | 1 | 0 | 2 | 1 | 2 | 0 | 0 | 15 |
| EPH   | OR | 32466885 | MPB/MABC | JA    | 1 | 1 | 1 | 1 | 1 | 2 | 1 | 1 | 0 | 2 | 1 | 0 | 2 | 1 | 15 |
| IN    | OR | 32479867 | CH       | DCu   | 2 | 1 | 1 | 1 | 1 | 2 | 0 | 1 | 2 | 2 | 1 | 0 | 0 | 1 | 15 |
| PRO   | OR | 32496423 | CM       | AFr   | 2 | 1 | 1 | 1 | 1 | 2 | 1 | 1 | 2 | 0 | 0 | 2 | 0 | 1 | 15 |
| EPH   | OR | 32502002 | MPB/MABC | CP    | 2 | 1 | 1 | 1 | 1 | 2 | 1 | 0 | 0 | 2 | 1 | 2 | 0 | 1 | 15 |
| PRO   | OR | 32573817 | CM       | SG    | 2 | 1 | 1 | 1 | 1 | 2 | 1 | 1 | 0 | 2 | 1 | 2 | 0 | 0 | 15 |
| PRE   | OR | 32593578 | DCr      | LB    | 2 | 1 | 1 | 1 | 1 | 2 | 1 | 0 | 0 | 2 | 1 | 2 | 0 | 1 | 15 |
| COVID | OR | 32618677 | YE       | JW    | 1 | 1 | 1 | 1 | 1 | 2 | 1 | 1 | 0 | 2 | 1 | 2 | 0 | 1 | 15 |
| IN    | OR | 32653389 | CH       | LAI   | 2 | 1 | 1 | 1 | 1 | 0 | 0 | 1 | 2 | 2 | 1 | 2 | 0 | 1 | 15 |
| IN    | OR | 32661097 | CH       | GS    | 2 | 1 | 1 | 1 | 1 | 2 | 1 | 1 | 2 | 0 | 0 | 2 | 0 | 1 | 15 |
| PRO   | OR | 32664989 | CM       | SC    | 2 | 1 | 1 | 1 | 1 | 2 | 1 | 1 | 2 | 2 | 1 | 0 | 0 | 0 | 15 |
| PRO   | OR | 32702410 | CM       | SC    | 1 | 1 | 1 | 1 | 1 | 2 | 1 | 1 | 2 | 2 | 1 | 0 | 0 | 1 | 15 |
| PRO   | OR | 32772282 | CM       | TR    | 2 | 1 | 1 | 1 | 0 | 2 | 1 | 1 | 0 | 2 | 1 | 2 | 0 | 1 | 15 |
| PRE   | OR | 32798357 | DCr      | BC    | 2 | 1 | 1 | 1 | 1 | 2 | 1 | 0 | 0 | 2 | 1 | 2 | 0 | 1 | 15 |
| IN    | OR | 32806620 | CH       | AS    | 2 | 1 | 1 | 1 | 1 | 0 | 0 | 1 | 2 | 2 | 1 | 2 | 0 | 1 | 15 |
| EPH   | OR | 32866165 | MPB/MABC | GK    | 2 | 1 | 1 | 1 | 0 | 2 | 1 | 1 | 2 | 2 | 1 | 0 | 0 | 1 | 15 |
| IN    | OR | 32911433 | CH       | NSh   | 2 | 1 | 1 | 1 | 0 | 2 | 1 | 1 | 2 | 2 | 1 | 0 | 0 | 1 | 15 |
| PRO   | OR | 32914452 | CM       | PP    | 3 | 1 | 1 | 1 | 1 | 2 | 1 | 1 | 0 | 2 | 1 | 0 | 0 | 1 | 15 |
| PRO   | OR | 32920792 | CM       | EL    | 2 | 1 | 1 | 1 | 1 | 2 | 1 | 1 | 0 | 2 | 1 | 2 | 0 | 0 | 15 |
| PRE   | OR | 32933179 | DCr      | AFe   | 3 | 1 | 1 | 1 | 1 | 2 | 1 | 1 | 0 | 2 | 1 | 0 | 0 | 1 | 15 |
| IN    | OR | 32962955 | CH       | AS    | 2 | 1 | 1 | 1 | 1 | 0 | 0 | 1 | 2 | 2 | 1 | 2 | 0 | 1 | 15 |
| PRE   | OR | 32979403 | DCr      | DCr   | 1 | 1 | 1 | 1 | 1 | 2 | 1 | 1 | 0 | 2 | 1 | 2 | 0 | 1 | 15 |
| IN    | OR | 32981529 | CH       | LAI   | 4 | 1 | 1 | 1 | 1 | 2 | 1 | 1 | 2 | 0 | 1 | 0 | 0 | 0 | 15 |
| PRO   | OR | 33046299 | CM       | EL    | 3 | 1 | 1 | 1 | 1 | 2 | 1 | 1 | 0 | 2 | 1 | 0 | 0 | 1 | 15 |
| PRE   | OR | 33074938 | DCr      | BC    | 1 | 1 | 1 | 1 | 1 | 2 | 1 | 1 | 0 | 2 | 1 | 2 | 0 | 1 | 15 |
| PRE   | OR | 33076942 | DCr      | JPo   | 1 | 1 | 1 | 1 | 1 | 2 | 1 | 1 | 2 | 2 | 1 | 0 | 0 | 1 | 15 |
| COVID | OR | 33091034 | YE       | SF    | 2 | 1 | 1 | 1 | 1 | 2 | 0 | 1 | 0 | 2 | 1 | 2 | 0 | 1 | 15 |
| PRO   | OR | 33106288 | CM       | CC    | 2 | 1 | 1 | 1 | 1 | 2 | 0 | 1 | 0 | 2 | 1 | 2 | 0 | 1 | 15 |
| PED   | OR | 33109667 | LAv      | KM    | 2 | 1 | 1 | 0 | 1 | 2 | 1 | 1 | 2 | 2 | 1 | 0 | 0 | 1 | 15 |
| EPH   | OR | 33221361 | MPB/MABC | CP    | 2 | 1 | 1 | 1 | 0 | 2 | 1 | 1 | 2 | 2 | 0 | 2 | 0 | 0 | 15 |
| EPH   | OR | 33221364 | MPB/MABC | SB    | 2 | 1 | 1 | 1 | 1 | 2 | 1 | 1 | 0 | 2 | 1 | 2 | 0 | 0 | 15 |
| PRE   | OR | 33247025 | DCr      | RC    | 2 | 1 | 1 | 0 | 1 | 2 | 1 | 1 | 0 | 2 | 1 | 2 | 0 | 1 | 15 |

|       |    |          |          |     |   |   |   |   |   |   |   |   |   |   |   |   |   |   |    |
|-------|----|----------|----------|-----|---|---|---|---|---|---|---|---|---|---|---|---|---|---|----|
| IN    | OR | 33309699 | CH       | MM  | 1 | 1 | 1 | 0 | 1 | 2 | 0 | 1 | 2 | 2 | 1 | 2 | 0 | 1 | 15 |
| IN    | OR | 33317367 | CH       | LAI | 2 | 1 | 1 | 1 | 1 | 2 | 1 | 0 | 2 | 0 | 1 | 2 | 0 | 1 | 15 |
| IN    | OR | 33332235 | CH       | LAI | 2 | 1 | 1 | 1 | 1 | 2 | 1 | 1 | 2 | 0 | 1 | 2 | 0 | 0 | 15 |
| IN    | OR | 33342651 | CH       | NSh | 1 | 1 | 1 | 1 | 1 | 2 | 1 | 1 | 0 | 0 | 1 | 2 | 2 | 1 | 15 |
| EPH   | OR | 33345270 | MPB/MABC | CP  | 2 | 1 | 1 | 1 | 1 | 2 | 1 | 1 | 2 | 2 | 1 | 0 | 0 | 0 | 15 |
| PED   | OR | 33350296 | LAav     | SL  | 1 | 1 | 1 | 1 | 1 | 2 | 1 | 1 | 2 | 2 | 1 | 0 | 0 | 1 | 15 |
| EPH   | OR | 33352202 | MPB/MABC | SC  | 2 | 1 | 1 | 1 | 0 | 2 | 1 | 1 | 2 | 2 | 1 | 0 | 0 | 1 | 15 |
| IN    | OR | 33362276 | CH       | DB  | 2 | 0 | 1 | 1 | 1 | 2 | 1 | 1 | 2 | 2 | 1 | 0 | 0 | 1 | 15 |
| EPH   | OR | 33383012 | MPB/MABC | GK  | 2 | 1 | 1 | 1 | 1 | 2 | 1 | 1 | 2 | 2 | 1 | 0 | 0 | 0 | 15 |
| COVID | OR | 33403368 | YE       | JW  | 2 | 1 | 1 | 1 | 1 | 2 | 0 | 1 | 0 | 2 | 1 | 2 | 0 | 1 | 15 |
| IN    | OR | 32905956 | CH       | SC  | 1 | 1 | 1 | 1 | 1 | 2 | 1 | 1 | 0 | 2 | 1 | 2 | 0 | 1 | 15 |
| PED   | OR | 32826836 | LAav     | SC  | 3 | 1 | 1 | 1 | 1 | 2 | 1 | 1 | 0 | 2 | 1 | 0 | 0 | 1 | 15 |
| PED   | OR | 32768496 | LAav     | SC  | 1 | 1 | 1 | 1 | 1 | 2 | 1 | 1 | 2 | 2 | 1 | 0 | 0 | 1 | 15 |
| PRE   | OR | 33080371 | DCr      | SC  | 3 | 1 | 1 | 1 | 1 | 2 | 1 | 1 | 0 | 2 | 1 | 0 | 0 | 1 | 15 |
| PRE   | OR | 32912645 | DCr      | SC  | 3 | 1 | 1 | 1 | 1 | 2 | 1 | 1 | 0 | 2 | 1 | 0 | 0 | 1 | 15 |
| PRO   | OR | 32653573 | CM       | SC  | 2 | 1 | 1 | 1 | 1 | 2 | 1 | 1 | 0 | 2 | 1 | 2 | 0 | 0 | 15 |
| PRO   | OR | 33120303 | CM       | SC  | 1 | 1 | 1 | 1 | 1 | 2 | 1 | 1 | 2 | 2 | 1 | 0 | 0 | 1 | 15 |
| PRO   | OR | 33022311 | CM       | SC  | 1 | 1 | 1 | 1 | 1 | 2 | 1 | 1 | 0 | 2 | 1 | 2 | 0 | 1 | 15 |
| PRO   | OR | 30632777 | CM       | EL  | 2 | 1 | 1 | 1 | 1 | 2 | 1 | 1 | 0 | 2 | 1 | 0 | 0 | 1 | 14 |
| PRO   | OR | 31306348 | CM       | CC  | 2 | 1 | 1 | 0 | 1 | 2 | 1 | 1 | 0 | 2 | 1 | 2 | 0 | 0 | 14 |
| PRO   | OR | 31351737 | CM       | PP  | 2 | 1 | 1 | 1 | 1 | 2 | 1 | 1 | 0 | 2 | 1 | 0 | 0 | 1 | 14 |
| PED   | OR | 31464818 | LAav     | DO  | 2 | 1 | 1 | 1 | 1 | 2 | 0 | 0 | 2 | 2 | 1 | 0 | 0 | 1 | 14 |
| PRO   | OR | 31466497 | CM       | TK  | 2 | 1 | 1 | 1 | 1 | 2 | 1 | 1 | 0 | 2 | 1 | 0 | 0 | 1 | 14 |
| EPH   | OR | 31567402 | MPB/MABC | SB  | 2 | 1 | 1 | 1 | 1 | 2 | 1 | 1 | 0 | 2 | 1 | 0 | 0 | 1 | 14 |
| PRE   | OR | 31900203 | DCr      | RC  | 2 | 1 | 1 | 1 | 1 | 2 | 1 | 1 | 2 | 0 | 1 | 0 | 0 | 1 | 14 |
| EPH   | OR | 31906816 | MPB/MABC | GK  | 2 | 1 | 1 | 1 | 1 | 2 | 1 | 1 | 2 | 0 | 1 | 0 | 0 | 1 | 14 |
| PRO   | OR | 31926259 | CM       | TR  | 2 | 1 | 1 | 1 | 1 | 2 | 1 | 1 | 2 | 0 | 1 | 0 | 0 | 1 | 14 |
| PRO   | OR | 31936049 | CM       | CC  | 2 | 1 | 1 | 1 | 1 | 2 | 0 | 1 | 0 | 2 | 1 | 2 | 0 | 0 | 14 |
| IN    | OR | 31941835 | CH       | DB  | 1 | 0 | 1 | 1 | 1 | 2 | 1 | 1 | 0 | 2 | 1 | 2 | 0 | 1 | 14 |
| EPH   | OR | 31950980 | MPB/MABC | EM  | 2 | 1 | 1 | 1 | 1 | 2 | 1 | 1 | 0 | 2 | 1 | 0 | 0 | 1 | 14 |
| EPH   | OR | 31987889 | MPB/MABC | YT  | 2 | 1 | 1 | 1 | 1 | 2 | 1 | 1 | 0 | 2 | 1 | 0 | 0 | 1 | 14 |
| EPH   | OR | 31996008 | MPB/MABC | SC  | 2 | 1 | 1 | 1 | 1 | 2 | 1 | 1 | 0 | 2 | 1 | 0 | 0 | 1 | 14 |
| PED   | OR | 32010648 | LAav     | JN  | 2 | 1 | 1 | 1 | 1 | 2 | 1 | 1 | 0 | 2 | 1 | 0 | 0 | 1 | 14 |
| PRE   | OR | 32023141 | DCr      | AFe | 2 | 1 | 1 | 1 | 1 | 2 | 1 | 1 | 0 | 2 | 1 | 0 | 0 | 1 | 14 |
| PRO   | OR | 32062287 | CM       | EL  | 2 | 1 | 1 | 1 | 1 | 2 | 1 | 1 | 0 | 2 | 1 | 0 | 0 | 1 | 14 |
| EPH   | OR | 32068027 | MPB/MABC | JA  | 2 | 1 | 1 | 1 | 1 | 2 | 1 | 1 | 0 | 2 | 1 | 0 | 0 | 1 | 14 |
| PRO   | OR | 32074542 | CM       | SZ  | 2 | 1 | 1 | 1 | 0 | 2 | 0 | 1 | 0 | 2 | 1 | 2 | 0 | 1 | 14 |
| PRO   | OR | 32075160 | CM       | SG  | 2 | 1 | 1 | 1 | 1 | 2 | 1 | 1 | 0 | 2 | 1 | 0 | 0 | 1 | 14 |
| IN    | OR | 32098088 | CH       | JR  | 2 | 1 | 1 | 1 | 1 | 2 | 1 | 1 | 0 | 0 | 1 | 2 | 0 | 1 | 14 |
| PRE   | OR | 32191020 | DCr      | BC  | 2 | 1 | 1 | 1 | 1 | 2 | 1 | 1 | 0 | 2 | 1 | 0 | 0 | 1 | 14 |
| EPH   | OR | 32199902 | MPB/MABC | JA  | 1 | 1 | 1 | 1 | 1 | 2 | 0 | 1 | 0 | 2 | 1 | 0 | 2 | 1 | 14 |
| EPH   | OR | 32199903 | MPB/MABC | CP  | 2 | 1 | 1 | 1 | 1 | 2 | 1 | 1 | 0 | 2 | 1 | 0 | 0 | 1 | 14 |
| EPH   | OR | 32205157 | MPB/MABC | YT  | 2 | 1 | 1 | 1 | 1 | 2 | 1 | 1 | 0 | 2 | 1 | 0 | 0 | 1 | 14 |
| PRE   | OR | 32210644 | DCr      | MB  | 2 | 1 | 1 | 1 | 1 | 2 | 1 | 1 | 0 | 2 | 1 | 0 | 0 | 1 | 14 |

|       |    |          |          |     |   |   |   |   |   |   |   |   |   |   |   |   |   |   |    |
|-------|----|----------|----------|-----|---|---|---|---|---|---|---|---|---|---|---|---|---|---|----|
| EPH   | OR | 32212234 | MPB/MABC | YT  | 2 | 1 | 1 | 1 | 1 | 2 | 1 | 1 | 0 | 2 | 1 | 0 | 0 | 1 | 14 |
| PRO   | OR | 32218134 | CM       | CC  | 2 | 1 | 1 | 1 | 1 | 2 | 1 | 1 | 0 | 0 | 1 | 2 | 0 | 1 | 14 |
| EPH   | OR | 32233752 | MPB/MABC | SC  | 1 | 1 | 1 | 1 | 1 | 2 | 1 | 1 | 2 | 2 | 1 | 0 | 0 | 0 | 14 |
| IN    | OR | 32240233 | CH       | SK  | 1 | 1 | 1 | 1 | 1 | 2 | 1 | 1 | 2 | 2 | 0 | 0 | 0 | 1 | 14 |
| EPH   | OR | 32247800 | MPB/MABC | JA  | 2 | 1 | 1 | 1 | 1 | 2 | 1 | 1 | 0 | 2 | 1 | 0 | 0 | 1 | 14 |
| PRE   | OR | 32269273 | DCr      | JPo | 3 | 1 | 1 | 0 | 0 | 2 | 1 | 0 | 2 | 2 | 1 | 0 | 0 | 1 | 14 |
| PRE   | OR | 32286908 | DCr      | MB  | 2 | 1 | 1 | 1 | 1 | 2 | 1 | 1 | 0 | 2 | 1 | 0 | 0 | 1 | 14 |
| PED   | OR | 32294013 | LAv      | SL  | 2 | 1 | 1 | 1 | 1 | 2 | 1 | 1 | 0 | 2 | 1 | 0 | 0 | 1 | 14 |
| PRE   | OR | 32316924 | DCr      | AFe | 2 | 1 | 1 | 1 | 1 | 2 | 1 | 1 | 0 | 2 | 1 | 0 | 0 | 1 | 14 |
| PRE   | OR | 32319300 | DCr      | LB  | 2 | 1 | 1 | 1 | 1 | 2 | 1 | 1 | 0 | 2 | 1 | 0 | 0 | 1 | 14 |
| IN    | OR | 32347959 | CH       | SK  | 3 | 1 | 1 | 1 | 1 | 2 | 1 | 1 | 0 | 0 | 1 | 2 | 0 | 0 | 14 |
| IN    | OR | 32395800 | CH       | LAI | 3 | 1 | 1 | 1 | 1 | 2 | 1 | 1 | 0 | 0 | 1 | 2 | 0 | 0 | 14 |
| EPH   | OR | 32417269 | MPB/MABC | EM  | 2 | 1 | 1 | 1 | 1 | 2 | 1 | 1 | 0 | 2 | 1 | 0 | 0 | 1 | 14 |
| EPH   | OR | 32422243 | MPB/MABC | SB  | 1 | 1 | 1 | 1 | 1 | 2 | 1 | 1 | 2 | 2 | 1 | 0 | 0 | 0 | 14 |
| PRO   | OR | 32435222 | CM       | CC  | 2 | 1 | 1 | 1 | 1 | 2 | 1 | 1 | 0 | 2 | 1 | 0 | 0 | 1 | 14 |
| COVID | OR | 32473113 | YE       | JW  | 2 | 1 | 1 | 1 | 1 | 2 | 1 | 1 | 0 | 2 | 1 | 0 | 0 | 1 | 14 |
| IN    | OR | 32479713 | CH       | NSh | 2 | 1 | 1 | 1 | 1 | 2 | 0 | 1 | 0 | 2 | 0 | 2 | 0 | 1 | 14 |
| EPH   | OR | 32536380 | MPB/MABC | GK  | 2 | 1 | 1 | 1 | 1 | 2 | 1 | 1 | 0 | 2 | 1 | 0 | 0 | 1 | 14 |
| PRE   | OR | 32550730 | DCr      | CE  | 2 | 1 | 1 | 1 | 1 | 2 | 1 | 1 | 0 | 2 | 1 | 0 | 0 | 1 | 14 |
| PRE   | OR | 32566308 | DCr      | CE  | 2 | 1 | 1 | 1 | 1 | 2 | 1 | 1 | 0 | 2 | 1 | 0 | 0 | 1 | 14 |
| IN    | OR | 32574652 | CH       | DB  | 1 | 1 | 1 | 1 | 1 | 2 | 0 | 1 | 2 | 2 | 1 | 0 | 0 | 1 | 14 |
| PRO   | OR | 32592732 | CM       | SG  | 2 | 0 | 1 | 0 | 1 | 2 | 1 | 1 | 0 | 2 | 1 | 2 | 0 | 1 | 14 |
| PED   | OR | 32616330 | LAv      | DO  | 2 | 1 | 1 | 1 | 1 | 2 | 1 | 1 | 0 | 2 | 1 | 0 | 0 | 1 | 14 |
| PED   | OR | 32622016 | LAv      | DO  | 2 | 1 | 1 | 1 | 1 | 2 | 1 | 1 | 0 | 2 | 1 | 0 | 0 | 1 | 14 |
| PRO   | OR | 32678212 | CM       | SZ  | 2 | 1 | 1 | 1 | 1 | 2 | 1 | 1 | 0 | 2 | 1 | 0 | 0 | 1 | 14 |
| IN    | OR | 32746623 | CH       | DCu | 1 | 1 | 1 | 1 | 1 | 2 | 0 | 1 | 2 | 0 | 1 | 2 | 0 | 1 | 14 |
| PRE   | OR | 32749227 | DCr      | AFe | 2 | 1 | 1 | 1 | 1 | 2 | 1 | 1 | 0 | 2 | 1 | 0 | 0 | 1 | 14 |
| PED   | OR | 32751367 | LAv      | KM  | 2 | 1 | 1 | 1 | 1 | 2 | 1 | 1 | 0 | 2 | 1 | 0 | 0 | 1 | 14 |
| PED   | OR | 32789097 | LAv      | AL  | 2 | 1 | 1 | 1 | 1 | 2 | 1 | 1 | 0 | 2 | 1 | 0 | 0 | 1 | 14 |
| PRO   | OR | 32796672 | CM       | CC  | 2 | 1 | 1 | 1 | 1 | 2 | 1 | 1 | 0 | 2 | 1 | 0 | 0 | 1 | 14 |
| EPH   | OR | 32869475 | MPB/MABC | EM  | 2 | 1 | 1 | 1 | 1 | 2 | 1 | 1 | 0 | 2 | 1 | 0 | 0 | 1 | 14 |
| PRO   | OR | 32883318 | CM       | AFr | 2 | 1 | 1 | 1 | 1 | 2 | 1 | 1 | 0 | 2 | 1 | 0 | 0 | 1 | 14 |
| PRO   | OR | 32894077 | CM       | TR  | 2 | 1 | 1 | 1 | 1 | 2 | 1 | 1 | 0 | 2 | 1 | 0 | 0 | 1 | 14 |
| PRO   | OR | 32900330 | CM       | JN  | 2 | 1 | 1 | 1 | 1 | 2 | 1 | 1 | 0 | 2 | 1 | 0 | 0 | 1 | 14 |
| IN    | OR | 32907387 | CH       | LAI | 2 | 1 | 1 | 1 | 1 | 2 | 1 | 1 | 2 | 0 | 1 | 0 | 0 | 1 | 14 |
| PRO   | OR | 32927857 | CM       | CC  | 2 | 1 | 1 | 1 | 1 | 2 | 1 | 1 | 0 | 2 | 1 | 0 | 0 | 1 | 14 |
| PRO   | OR | 32931854 | CM       | TK  | 2 | 1 | 1 | 1 | 1 | 2 | 1 | 1 | 0 | 2 | 1 | 0 | 0 | 1 | 14 |
| COVID | OR | 32961304 | YE       | MD  | 2 | 1 | 1 | 1 | 1 | 2 | 1 | 1 | 0 | 2 | 1 | 0 | 0 | 1 | 14 |
| PRO   | OR | 33002033 | CM       | EL  | 2 | 1 | 1 | 1 | 1 | 2 | 1 | 1 | 0 | 2 | 1 | 0 | 0 | 1 | 14 |
| PED   | OR | 33046222 | LAv      | KM  | 2 | 1 | 1 | 1 | 1 | 2 | 1 | 1 | 0 | 2 | 1 | 0 | 0 | 1 | 14 |
| PRE   | OR | 33067067 | DCr      | RC  | 2 | 1 | 1 | 1 | 1 | 2 | 1 | 1 | 0 | 2 | 1 | 0 | 0 | 1 | 14 |
| EPH   | OR | 33077123 | MPB/MABC | EM  | 2 | 1 | 1 | 1 | 1 | 0 | 0 | 1 | 0 | 2 | 0 | 2 | 2 | 1 | 14 |
| IN    | OR | 33092729 | CH       | GS  | 2 | 1 | 1 | 1 | 1 | 2 | 1 | 1 | 0 | 2 | 1 | 0 | 0 | 1 | 14 |
| PRO   | OR | 33122807 | CM       | TK  | 2 | 1 | 1 | 1 | 1 | 2 | 1 | 1 | 0 | 2 | 1 | 0 | 0 | 1 | 14 |



|       |    |          |          |       |   |   |   |   |   |   |   |   |   |   |   |   |   |   |    |
|-------|----|----------|----------|-------|---|---|---|---|---|---|---|---|---|---|---|---|---|---|----|
| PED   | OR | 33134763 | LAv      | KC    | 1 | 1 | 1 | 1 | 1 | 0 | 0 | 1 | 0 | 2 | 1 | 2 | 2 | 1 | 14 |
| COVID | OR | 33140396 | YE       | FA    | 2 | 1 | 1 | 1 | 1 | 2 | 1 | 1 | 0 | 2 | 1 | 0 | 0 | 1 | 14 |
| PRE   | OR | 33188832 | DCr      | CE    | 1 | 1 | 1 | 1 | 1 | 0 | 0 | 1 | 2 | 2 | 1 | 2 | 0 | 1 | 14 |
| EPH   | OR | 33201082 | MPB/MABC | CP    | 2 | 1 | 1 | 1 | 0 | 2 | 1 | 0 | 2 | 2 | 1 | 0 | 0 | 1 | 14 |
| PRE   | OR | 33242937 | DCr      | MB    | 1 | 0 | 0 | 1 | 0 | 0 | 1 | 1 | 2 | 2 | 1 | 2 | 2 | 1 | 14 |
| EPH   | OR | 33253769 | MPB/MABC | EM    | 2 | 1 | 1 | 1 | 1 | 2 | 1 | 1 | 0 | 2 | 1 | 0 | 0 | 1 | 14 |
| PED   | OR | 33264117 | LAv      | NSa   | 2 | 1 | 1 | 1 | 1 | 2 | 1 | 1 | 0 | 2 | 1 | 0 | 0 | 1 | 14 |
| PRE   | OR | 33293876 | DCr      | DCr   | 2 | 1 | 1 | 1 | 1 | 2 | 1 | 1 | 0 | 2 | 1 | 0 | 0 | 1 | 14 |
| EPH   | OR | 33314514 | MPB/MABC | CP    | 2 | 1 | 1 | 1 | 0 | 2 | 1 | 1 | 2 | 2 | 1 | 0 | 0 | 0 | 14 |
| COVID | OR | 33339538 | YE       | MA    | 2 | 1 | 1 | 0 | 1 | 0 | 1 | 0 | 0 | 2 | 1 | 2 | 2 | 1 | 14 |
| PRO   | OR | 33362228 | CM       | SC    | 2 | 1 | 1 | 1 | 1 | 2 | 1 | 1 | 0 | 2 | 1 | 0 | 0 | 1 | 14 |
| IN    | OR | 33369528 | CH       | SK    | 1 | 1 | 1 | 1 | 0 | 2 | 1 | 1 | 0 | 2 | 1 | 2 | 0 | 1 | 14 |
| PRO   | OR | 33440102 | CM       | CC    | 2 | 1 | 1 | 1 | 1 | 2 | 1 | 1 | 0 | 2 | 1 | 0 | 0 | 1 | 14 |
| COVID | OR | 33447325 | YE       | SF    | 2 | 1 | 1 | 1 | 1 | 2 | 1 | 1 | 0 | 2 | 1 | 0 | 0 | 1 | 14 |
| COVID | OR | 33472127 | YE       | FA    | 2 | 1 | 1 | 1 | 1 | 2 | 1 | 1 | 0 | 2 | 1 | 0 | 0 | 1 | 14 |
| EPH   | OR | 32853725 | MPB/MABC | SC    | 2 | 1 | 1 | 1 | 1 | 2 | 1 | 1 | 2 | 0 | 1 | 0 | 0 | 1 | 14 |
| EPH   | OR | 32791472 | MPB/MABC | SC    | 2 | 1 | 1 | 1 | 1 | 2 | 1 | 1 | 2 | 0 | 1 | 0 | 0 | 1 | 14 |
| EPH   | OR | 33164882 | MPB/MABC | SC    | 2 | 1 | 1 | 1 | 1 | 2 | 1 | 1 | 0 | 2 | 1 | 0 | 0 | 1 | 14 |
| EPH   | OR | 32653865 | MPB/MABC | SC    | 2 | 1 | 1 | 1 | 1 | 2 | 1 | 1 | 0 | 2 | 1 | 0 | 0 | 1 | 14 |
| IN    | OR | 33191207 | CH       | SC    | 2 | 1 | 1 | 1 | 1 | 2 | 1 | 1 | 0 | 2 | 1 | 0 | 0 | 1 | 14 |
| IN    | OR | 33129913 | CH       | SC    | 2 | 1 | 1 | 1 | 1 | 2 | 1 | 1 | 0 | 2 | 1 | 0 | 0 | 1 | 14 |
| IN    | OR | 32653570 | CH       | SC    | 2 | 1 | 1 | 1 | 1 | 2 | 1 | 1 | 0 | 2 | 1 | 0 | 0 | 1 | 14 |
| IN    | OR | 33009952 | CH       | SC    | 2 | 1 | 1 | 1 | 1 | 2 | 1 | 1 | 0 | 2 | 1 | 0 | 0 | 1 | 14 |
| PED   | OR | 32653571 | LAv      | SC    | 2 | 1 | 1 | 1 | 1 | 2 | 1 | 1 | 0 | 2 | 1 | 0 | 0 | 1 | 14 |
| PED   | OR | 32788142 | LAv      | SC    | 3 | 1 | 1 | 1 | 1 | 2 | 1 | 1 | 0 | 1 | 1 | 0 | 0 | 1 | 14 |
| PED   | OR | 32808054 | LAv      | SC    | 2 | 1 | 1 | 1 | 1 | 2 | 1 | 1 | 0 | 2 | 1 | 0 | 0 | 1 | 14 |
| PRE   | OR | 32814479 | DCr      | SC    | 2 | 1 | 1 | 1 | 1 | 2 | 1 | 1 | 0 | 2 | 1 | 0 | 0 | 1 | 14 |
| PRE   | OR | 32771318 | DCr      | SC    | 2 | 1 | 1 | 1 | 1 | 2 | 1 | 1 | 0 | 2 | 1 | 0 | 0 | 1 | 14 |
| PRO   | OR | 32653575 | CM       | SC    | 2 | 1 | 1 | 1 | 1 | 2 | 1 | 1 | 0 | 2 | 1 | 0 | 0 | 1 | 14 |
| PRO   | OR | 32673734 | CM       | SC    | 2 | 1 | 1 | 1 | 1 | 2 | 1 | 1 | 0 | 2 | 1 | 0 | 0 | 1 | 14 |
| PRO   | OR | 33027618 | CM       | SC    | 2 | 1 | 1 | 1 | 1 | 2 | 1 | 1 | 0 | 2 | 1 | 0 | 0 | 1 | 14 |
| PRO   | OR | 33059990 | CM       | SC    | 2 | 1 | 1 | 1 | 1 | 2 | 1 | 1 | 0 | 2 | 1 | 0 | 0 | 1 | 14 |
| PRO   | OR | 33069866 | CM       | SC    | 1 | 1 | 1 | 1 | 1 | 2 | 1 | 1 | 2 | 2 | 1 | 0 | 0 | 0 | 14 |
| PRO   | OR | 32755664 | CM       | SC    | 2 | 1 | 1 | 1 | 1 | 2 | 1 | 1 | 0 | 2 | 1 | 0 | 0 | 1 | 14 |
| PED   | OR | 30714507 | LAv      | AH    | 2 | 1 | 1 | 1 | 1 | 0 | 0 | 1 | 2 | 2 | 1 | 0 | 0 | 1 | 13 |
| PRO   | OR | 31526251 | CM       | JN    | 2 | 1 | 1 | 0 | 1 | 2 | 1 | 1 | 0 | 2 | 1 | 0 | 0 | 1 | 13 |
| PRE   | OR | 31910801 | DCr      | AFe   | 1 | 1 | 1 | 1 | 1 | 2 | 1 | 1 | 0 | 2 | 1 | 0 | 0 | 1 | 13 |
| PED   | OR | 31913406 | LAv      | NA    | 2 | 1 | 1 | 1 | 1 | 2 | 1 | 1 | 0 | 2 | 0 | 0 | 0 | 1 | 13 |
| EPH   | OR | 32045663 | MPB/MABC | JA    | 1 | 1 | 1 | 1 | 1 | 2 | 1 | 1 | 0 | 2 | 1 | 0 | 0 | 1 | 13 |
| IN    | OR | 32066312 | CH       | JR    | 2 | 1 | 1 | 1 | 0 | 2 | 0 | 1 | 2 | 0 | 1 | 0 | 2 | 0 | 13 |
| PED   | OR | 32088254 | LAv      | LA/JP | 2 | 1 | 1 | 1 | 1 | 0 | 0 | 1 | 2 | 2 | 1 | 0 | 0 | 1 | 13 |
| EPH   | OR | 32110121 | MPB/MABC | SB    | 2 | 1 | 1 | 1 | 1 | 2 | 1 | 1 | 0 | 2 | 1 | 0 | 0 | 0 | 13 |
| EPH   | OR | 32294490 | MPB/MABC | SB    | 2 | 1 | 1 | 1 | 1 | 2 | 1 | 1 | 0 | 2 | 1 | 0 | 0 | 0 | 13 |
| PRO   | OR | 32380938 | CM       | CC    | 2 | 1 | 1 | 1 | 1 | 2 | 0 | 1 | 0 | 2 | 1 | 0 | 0 | 1 | 13 |

|       |    |          |          |       |   |   |   |   |   |   |   |   |   |   |   |   |   |   |    |
|-------|----|----------|----------|-------|---|---|---|---|---|---|---|---|---|---|---|---|---|---|----|
| PRO   | OR | 32531404 | CM       | SG    | 2 | 0 | 1 | 1 | 1 | 2 | 1 | 1 | 0 | 2 | 1 | 0 | 0 | 1 | 13 |
| PRO   | OR | 32531406 | CM       | SG    | 2 | 0 | 1 | 1 | 1 | 2 | 1 | 1 | 0 | 2 | 1 | 0 | 0 | 1 | 13 |
| PRO   | OR | 32532312 | CM       | EL    | 2 | 1 | 1 | 1 | 1 | 0 | 0 | 1 | 0 | 2 | 1 | 0 | 2 | 1 | 13 |
| IN    | OR | 32533313 | CH       | NSh   | 2 | 1 | 1 | 1 | 1 | 2 | 1 | 1 | 0 | 2 | 0 | 0 | 0 | 1 | 13 |
| PRO   | OR | 32544414 | CM       | SG    | 2 | 0 | 1 | 1 | 1 | 2 | 1 | 1 | 0 | 2 | 1 | 0 | 0 | 1 | 13 |
| EPH   | OR | 32546506 | MPB/MABC | GK    | 2 | 1 | 1 | 1 | 1 | 2 | 1 | 1 | 2 | 0 | 1 | 0 | 0 | 0 | 13 |
| EPH   | OR | 32674809 | MPB/MABC | EM    | 2 | 1 | 1 | 1 | 1 | 2 | 0 | 1 | 0 | 2 | 1 | 0 | 0 | 1 | 13 |
| COVID | OR | 32758516 | YE       | MA    | 2 | 1 | 1 | 1 | 1 | 0 | 0 | 1 | 0 | 2 | 1 | 2 | 0 | 1 | 13 |
| IN    | OR | 32791707 | CH       | GS    | 2 | 1 | 1 | 1 | 1 | 2 | 1 | 1 | 2 | 0 | 1 | 0 | 0 | 0 | 13 |
| PRE   | OR | 32814922 | DCr      | DCr   | 3 | 1 | 1 | 1 | 1 | 0 | 0 | 0 | 2 | 2 | 1 | 0 | 0 | 1 | 13 |
| PRO   | OR | 32871190 | CM       | TK    | 2 | 1 | 1 | 1 | 1 | 0 | 0 | 1 | 0 | 2 | 1 | 2 | 0 | 1 | 13 |
| IN    | OR | 32919449 | CH       | DB    | 2 | 0 | 1 | 1 | 1 | 2 | 1 | 1 | 0 | 2 | 1 | 0 | 0 | 1 | 13 |
| EPH   | OR | 32946861 | MPB/MABC | SC    | 2 | 1 | 1 | 1 | 1 | 2 | 0 | 1 | 2 | 0 | 1 | 0 | 0 | 1 | 13 |
| PRO   | OR | 32962022 | CM       | CC    | 2 | 1 | 1 | 1 | 1 | 2 | 0 | 1 | 0 | 2 | 1 | 0 | 0 | 1 | 13 |
| COVID | OR | 32975134 | YE       | JW    | 2 | 1 | 1 | 1 | 1 | 2 | 0 | 1 | 0 | 2 | 1 | 0 | 0 | 1 | 13 |
| PED   | OR | 32978195 | LAv      | ME/JH | 2 | 1 | 0 | 0 | 0 | 2 | 1 | 1 | 2 | 2 | 1 | 0 | 0 | 1 | 13 |
| PRO   | OR | 33020969 | CM       | SC    | 2 | 1 | 1 | 0 | 1 | 2 | 1 | 1 | 0 | 2 | 1 | 0 | 0 | 1 | 13 |
| IN    | OR | 33041520 | CH       | JR    | 1 | 1 | 1 | 1 | 1 | 2 | 1 | 1 | 0 | 2 | 1 | 0 | 0 | 1 | 13 |
| PRE   | OR | 33044927 | DCr      | MB    | 2 | 1 | 1 | 1 | 0 | 0 | 1 | 1 | 2 | 2 | 1 | 0 | 0 | 1 | 13 |
| PED   | OR | 33087375 | LAv      | KC    | 2 | 1 | 0 | 0 | 0 | 2 | 1 | 1 | 2 | 2 | 1 | 0 | 0 | 1 | 13 |
| PRE   | OR | 33103746 | DCr      | AFe   | 1 | 1 | 1 | 1 | 1 | 2 | 1 | 1 | 0 | 2 | 1 | 0 | 0 | 1 | 13 |
| EPH   | OR | 33155574 | MPB/MABC | YT    | 1 | 1 | 1 | 1 | 1 | 2 | 1 | 1 | 0 | 2 | 1 | 0 | 0 | 1 | 13 |
| PRO   | OR | 33227398 | CM       | SZ    | 2 | 1 | 1 | 1 | 1 | 2 | 1 | 1 | 0 | 2 | 1 | 0 | 0 | 0 | 13 |
| EPH   | OR | 33294518 | MPB/MABC | GK    | 4 | 1 | 1 | 1 | 1 | 2 | 1 | 1 | 0 | 0 | 1 | 0 | 0 | 0 | 13 |
| EPH   | OR | 33361135 | MPB/MABC | GK    | 2 | 1 | 1 | 1 | 1 | 2 | 1 | 1 | 0 | 2 | 1 | 0 | 0 | 0 | 13 |
| PRO   | OR | 33380239 | CM       | AFr   | 2 | 1 | 1 | 1 | 1 | 0 | 0 | 1 | 2 | 2 | 1 | 0 | 0 | 1 | 13 |
| PRO   | OR | 33385467 | CM       | CC    | 2 | 1 | 1 | 1 | 1 | 2 | 0 | 1 | 0 | 2 | 1 | 0 | 0 | 1 | 13 |
| EPH   | OR | 33137419 | MPB/MABC | SC    | 1 | 1 | 1 | 1 | 1 | 2 | 1 | 1 | 2 | 0 | 1 | 0 | 0 | 1 | 13 |
| IN    | OR | 33080369 | CH       | SC    | 1 | 1 | 1 | 1 | 1 | 2 | 1 | 1 | 2 | 0 | 1 | 0 | 0 | 1 | 13 |
| IN    | OR | 32711346 | CH       | SC    | 1 | 1 | 1 | 1 | 1 | 2 | 1 | 1 | 0 | 0 | 1 | 2 | 0 | 1 | 13 |
| IN    | OR | 32866549 | CH       | SC    | 1 | 1 | 1 | 1 | 1 | 2 | 1 | 1 | 0 | 2 | 1 | 0 | 0 | 1 | 13 |
| PRE   | OR | 32622015 | DCr      | SC    | 2 | 1 | 0 | 1 | 1 | 2 | 1 | 1 | 0 | 2 | 1 | 0 | 0 | 1 | 13 |
| IN    | OR | 33058992 | CH       | SC    | 1 | 1 | 1 | 1 | 1 | 2 | 1 | 1 | 0 | 2 | 1 | 0 | 0 | 1 | 13 |
| PED   | OR | 32669214 | LAv      | SC    | 1 | 1 | 1 | 1 | 1 | 2 | 1 | 1 | 0 | 2 | 1 | 0 | 0 | 1 | 13 |
| PRO   | OR | 32629092 | CM       | SC    | 1 | 1 | 1 | 1 | 1 | 2 | 1 | 1 | 0 | 2 | 1 | 0 | 0 | 1 | 13 |
| PRO   | OR | 32697963 | CM       | SC    | 1 | 1 | 1 | 1 | 1 | 2 | 1 | 1 | 0 | 2 | 1 | 0 | 0 | 1 | 13 |
| EPH   | OR | 31124734 | MPB/MABC | YT    | 2 | 1 | 1 | 1 | 1 | 2 | 0 | 0 | 0 | 2 | 1 | 0 | 0 | 1 | 12 |
| IN    | OR | 31287385 | CH       | DB    | 1 | 0 | 1 | 1 | 1 | 0 | 0 | 1 | 2 | 2 | 0 | 2 | 0 | 1 | 12 |
| EPH   | OR | 31371337 | MPB/MABC | EM    | 2 | 1 | 1 | 1 | 1 | 2 | 1 | 1 | 0 | 0 | 1 | 0 | 0 | 1 | 12 |
| PRO   | OR | 31714000 | CM       | SZ    | 2 | 1 | 1 | 1 | 1 | 2 | 0 | 1 | 0 | 2 | 1 | 0 | 0 | 0 | 12 |
| EPH   | OR | 31911523 | MPB/MABC | GK    | 2 | 1 | 1 | 1 | 1 | 2 | 1 | 1 | 0 | 0 | 1 | 0 | 0 | 1 | 12 |
| PRO   | OR | 31918812 | CM       | JN    | 2 | 1 | 1 | 1 | 1 | 2 | 1 | 1 | 0 | 2 | 0 | 0 | 0 | 0 | 12 |
| PRE   | OR | 31926614 | DCr      | MB    | 1 | 0 | 1 | 0 | 1 | 2 | 1 | 0 | 2 | 2 | 1 | 0 | 0 | 1 | 12 |
| IN    | OR | 32004661 | CH       | DB    | 1 | 0 | 1 | 1 | 1 | 2 | 0 | 1 | 2 | 2 | 0 | 0 | 0 | 1 | 12 |

|       |    |          |          |     |   |   |   |   |   |   |   |   |   |   |   |   |   |   |    |
|-------|----|----------|----------|-----|---|---|---|---|---|---|---|---|---|---|---|---|---|---|----|
| EPH   | OR | 32027981 | MPB/MABC | YT  | 2 | 1 | 1 | 1 | 1 | 0 | 1 | 1 | 0 | 2 | 1 | 0 | 0 | 1 | 12 |
| IN    | OR | 32114070 | CH       | DB  | 2 | 0 | 1 | 1 | 1 | 2 | 0 | 1 | 2 | 0 | 1 | 0 | 0 | 1 | 12 |
| EPH   | OR | 32339953 | MPB/MABC | CP  | 1 | 1 | 1 | 1 | 1 | 2 | 1 | 1 | 0 | 2 | 1 | 0 | 0 | 0 | 12 |
| EPH   | OR | 32464107 | MPB/MABC | GK  | 2 | 1 | 1 | 1 | 1 | 2 | 1 | 1 | 0 | 0 | 1 | 0 | 0 | 1 | 12 |
| EPH   | OR | 32482170 | MPB/MABC | EM  | 1 | 1 | 1 | 1 | 1 | 2 | 1 | 1 | 0 | 2 | 0 | 0 | 0 | 1 | 12 |
| EPH   | OR | 32573508 | MPB/MABC | GK  | 2 | 1 | 1 | 1 | 1 | 2 | 1 | 1 | 0 | 2 | 0 | 0 | 0 | 0 | 12 |
| EPH   | OR | 32639440 | MPB/MABC | CP  | 2 | 1 | 1 | 1 | 1 | 2 | 1 | 0 | 0 | 0 | 1 | 2 | 0 | 0 | 12 |
| EPH   | OR | 32645615 | MPB/MABC | CP  | 2 | 1 | 1 | 1 | 0 | 2 | 1 | 1 | 0 | 0 | 0 | 2 | 0 | 1 | 12 |
| IN    | OR | 32695997 | CH       | NSh | 1 | 0 | 1 | 1 | 1 | 2 | 0 | 1 | 0 | 2 | 1 | 2 | 0 | 0 | 12 |
| IN    | OR | 32775119 | CH       | NSh | 2 | 1 | 1 | 1 | 1 | 0 | 1 | 1 | 2 | 0 | 1 | 0 | 0 | 1 | 12 |
| COVID | OR | 32986117 | YE       | MA  | 2 | 1 | 1 | 1 | 1 | 0 | 1 | 1 | 0 | 2 | 1 | 0 | 0 | 1 | 12 |
| IN    | OR | 32990791 | CH       | DB  | 1 | 0 | 1 | 1 | 1 | 2 | 1 | 1 | 0 | 2 | 1 | 0 | 0 | 1 | 12 |
| IN    | OR | 33063020 | CH       | MM  | 2 | 1 | 1 | 1 | 1 | 2 | 0 | 0 | 0 | 2 | 1 | 0 | 0 | 1 | 12 |
| EPH   | OR | 33098255 | MPB/MABC | YT  | 1 | 1 | 1 | 1 | 1 | 0 | 1 | 0 | 0 | 2 | 1 | 0 | 2 | 1 | 12 |
| PRE   | OR | 33107394 | DCr      | LB  | 2 | 1 | 1 | 1 | 1 | 0 | 1 | 1 | 0 | 2 | 1 | 0 | 0 | 1 | 12 |
| PRO   | OR | 33157983 | CM       | AFr | 2 | 0 | 1 | 1 | 1 | 2 | 1 | 1 | 0 | 2 | 1 | 0 | 0 | 0 | 12 |
| EPH   | OR | 33177892 | MPB/MABC | SB  | 1 | 1 | 1 | 1 | 1 | 2 | 1 | 1 | 0 | 2 | 1 | 0 | 0 | 0 | 12 |
| PRO   | OR | 33336526 | CM       | TR  | 2 | 1 | 1 | 1 | 1 | 0 | 1 | 1 | 0 | 2 | 1 | 0 | 0 | 1 | 12 |
| IN    | OR | 33359178 | CH       | GS  | 1 | 1 | 1 | 1 | 1 | 2 | 1 | 1 | 0 | 0 | 1 | 2 | 0 | 0 | 12 |
| EPH   | OR | 33379208 | MPB/MABC | CP  | 2 | 1 | 1 | 1 | 1 | 2 | 1 | 1 | 0 | 0 | 1 | 0 | 0 | 1 | 12 |
| EPH   | OR | 31974532 | MPB/MABC | EM  | 2 | 1 | 1 | 1 | 1 | 0 | 0 | 1 | 0 | 2 | 1 | 0 | 0 | 1 | 11 |
| IN    | OR | 32027055 | CH       | SK  | 2 | 1 | 1 | 1 | 1 | 2 | 1 | 1 | 0 | 0 | 0 | 0 | 0 | 1 | 11 |
| EPH   | OR | 32074552 | MPB/MABC | CP  | 1 | 1 | 1 | 1 | 1 | 2 | 1 | 1 | 0 | 0 | 1 | 0 | 0 | 1 | 11 |
| EPH   | OR | 32143653 | MPB/MABC | SB  | 1 | 1 | 1 | 1 | 1 | 2 | 1 | 1 | 0 | 0 | 1 | 0 | 0 | 1 | 11 |
| PRO   | OR | 32156250 | CM       | AFr | 2 | 1 | 1 | 1 | 1 | 2 | 1 | 1 | 0 | 0 | 1 | 0 | 0 | 0 | 11 |
| EPH   | OR | 32166951 | MPB/MABC | GK  | 2 | 1 | 1 | 1 | 1 | 2 | 1 | 1 | 0 | 0 | 1 | 0 | 0 | 0 | 11 |
| PRO   | OR | 32167216 | CM       | TK  | 2 | 1 | 1 | 1 | 1 | 2 | 1 | 1 | 0 | 0 | 1 | 0 | 0 | 0 | 11 |
| IN    | OR | 32167977 | CH       | NSh | 2 | 1 | 1 | 1 | 1 | 2 | 1 | 1 | 0 | 0 | 0 | 0 | 0 | 1 | 11 |
| PRO   | OR | 32180344 | CM       | TK  | 2 | 1 | 1 | 1 | 1 | 2 | 1 | 1 | 0 | 0 | 1 | 0 | 0 | 0 | 11 |
| IN    | OR | 32201581 | CH       | MM  | 2 | 1 | 1 | 1 | 1 | 2 | 1 | 1 | 0 | 0 | 0 | 0 | 0 | 1 | 11 |
| EPH   | OR | 32246986 | MPB/MABC | SB  | 2 | 1 | 1 | 1 | 1 | 2 | 1 | 1 | 0 | 0 | 1 | 0 | 0 | 0 | 11 |
| EPH   | OR | 32308184 | MPB/MABC | CP  | 2 | 1 | 1 | 1 | 1 | 2 | 1 | 0 | 0 | 0 | 1 | 0 | 0 | 1 | 11 |
| PRO   | OR | 32360319 | CM       | TK  | 2 | 1 | 1 | 1 | 1 | 2 | 0 | 1 | 0 | 0 | 1 | 0 | 0 | 1 | 11 |
| EPH   | OR | 32377439 | MPB/MABC | CP  | 1 | 1 | 1 | 1 | 1 | 2 | 1 | 1 | 0 | 0 | 1 | 0 | 0 | 1 | 11 |
| EPH   | OR | 32410575 | MPB/MABC | SB  | 1 | 1 | 1 | 1 | 1 | 2 | 1 | 1 | 0 | 2 | 0 | 0 | 0 | 0 | 11 |
| EPH   | OR | 32713583 | MPB/MABC | SB  | 2 | 1 | 1 | 1 | 1 | 2 | 1 | 1 | 0 | 0 | 1 | 0 | 0 | 0 | 11 |
| EPH   | OR | 32878960 | MPB/MABC | GK  | 2 | 1 | 1 | 1 | 1 | 2 | 1 | 1 | 0 | 0 | 0 | 0 | 0 | 1 | 11 |
| PRO   | OR | 32994252 | CM       | TR  | 2 | 1 | 1 | 0 | 0 | 2 | 1 | 1 | 0 | 2 | 1 | 0 | 0 | 0 | 11 |
| EPH   | OR | 33184114 | MPB/MABC | GK  | 2 | 1 | 1 | 1 | 1 | 2 | 1 | 1 | 0 | 0 | 1 | 0 | 0 | 0 | 11 |
| EPH   | OR | 33334420 | MPB/MABC | GK  | 2 | 1 | 1 | 1 | 1 | 2 | 1 | 1 | 0 | 0 | 1 | 0 | 0 | 0 | 11 |
| EPH   | OR | 29611174 | MPB/MABC | JA  | 2 | 1 | 1 | 0 | 1 | 0 | 0 | 1 | 0 | 2 | 1 | 0 | 0 | 1 | 10 |
| EPH   | OR | 31422363 | MPB/MABC | GK  | 2 | 1 | 1 | 1 | 0 | 2 | 1 | 1 | 0 | 0 | 1 | 0 | 0 | 0 | 10 |
| EPH   | OR | 32196360 | MPB/MABC | CP  | 2 | 1 | 1 | 1 | 1 | 2 | 1 | 1 | 0 | 0 | 0 | 0 | 0 | 0 | 10 |
| EPH   | OR | 32259608 | MPB/MABC | SB  | 2 | 1 | 1 | 1 | 1 | 2 | 1 | 1 | 0 | 0 | 0 | 0 | 0 | 0 | 10 |

|     |    |          |          |     |   |   |   |   |   |   |   |   |   |   |   |   |   |   |    |
|-----|----|----------|----------|-----|---|---|---|---|---|---|---|---|---|---|---|---|---|---|----|
| PRE | OR | 32355897 | DCr      | MB  | 2 | 1 | 1 | 1 | 0 | 0 | 0 | 1 | 0 | 2 | 1 | 0 | 0 | 1 | 10 |
| EPH | OR | 32370539 | MPB/MABC | SB  | 1 | 1 | 1 | 1 | 1 | 2 | 1 | 1 | 0 | 0 | 1 | 0 | 0 | 0 | 10 |
| PRO | OR | 32435933 | CM       | CC  | 2 | 0 | 1 | 1 | 1 | 2 | 1 | 1 | 0 | 0 | 1 | 0 | 0 | 0 | 10 |
| PRE | OR | 32445305 | DCr      | AS  | 2 | 1 | 1 | 1 | 1 | 0 | 0 | 0 | 0 | 2 | 1 | 0 | 0 | 1 | 10 |
| EPH | OR | 32520239 | MPB/MABC | SB  | 1 | 1 | 1 | 1 | 1 | 2 | 1 | 1 | 0 | 0 | 1 | 0 | 0 | 0 | 10 |
| PRO | OR | 32684603 | CM       | AFr | 2 | 1 | 1 | 1 | 0 | 2 | 1 | 1 | 0 | 0 | 1 | 0 | 0 | 0 | 10 |
| PRO | OR | 32794489 | CM       | AFr | 2 | 1 | 1 | 1 | 0 | 2 | 1 | 1 | 0 | 0 | 1 | 0 | 0 | 0 | 10 |
| PRO | OR | 33149947 | CM       | CC  | 2 | 1 | 1 | 1 | 1 | 0 | 0 | 1 | 0 | 2 | 1 | 0 | 0 | 0 | 10 |
| EPH | OR | 33234358 | MPB/MABC | CP  | 2 | 1 | 1 | 1 | 1 | 2 | 1 | 1 | 0 | 0 | 0 | 0 | 0 | 0 | 10 |
| EPH | OR | 33359108 | MPB/MABC | SB  | 2 | 1 | 1 | 1 | 1 | 2 | 1 | 1 | 0 | 0 | 0 | 0 | 0 | 0 | 10 |
| IN  | OR | 32103748 | CH       | LAI | 1 | 1 | 1 | 1 | 1 | 2 | 1 | 1 | 0 | 0 | 0 | 0 | 0 | 0 | 9  |
| PRE | OR | 32197687 | DCr      | BC  | 2 | 1 | 1 | 1 | 1 | 2 | 1 | 0 | 0 | 0 | 0 | 0 | 0 | 0 | 9  |
| EPH | OR | 32422245 | MPB/MABC | JA  | 1 | 0 | 1 | 1 | 1 | 0 | 0 | 1 | 0 | 2 | 1 | 0 | 0 | 1 | 9  |
| EPH | OR | 32900253 | MPB/MABC | EM  | 1 | 1 | 1 | 1 | 1 | 0 | 0 | 0 | 0 | 2 | 1 | 0 | 0 | 1 | 9  |
| PRO | OR | 31270799 | CM       | TP  | 2 | 1 | 1 | 1 | 0 | 0 | 1 | 0 | 2 | 0 | 0 | 0 | 0 | 0 | 8  |
| EPH | OR | 33027401 | MPB/MABC | CP  | 1 | 1 | 1 | 1 | 0 | 2 | 1 | 0 | 0 | 0 | 1 | 0 | 0 | 0 | 8  |
| PRO | OR | 33289651 | CM       | PP  | 2 | 1 | 1 | 1 | 1 | 0 | 0 | 1 | 0 | 0 | 1 | 0 | 0 | 0 | 8  |
| PRO | OR | 32052370 | CM       | AFr | 1 | 1 | 1 | 1 | 1 | 0 | 1 | 0 | 0 | 0 | 1 | 0 | 0 | 0 | 7  |
| EPH | OR | 32244225 | MPB/MABC | GK  | 2 | 0 | 0 | 1 | 1 | 0 | 0 | 0 | 0 | 0 | 1 | 0 | 0 | 1 | 6  |
